# Supplementary material for: Hypoxia-inducible factor cell non-autonomously regulates C. elegans stress responses and behavior via a nuclear receptor
Source: eLife journal article supplement (doi:10.7554/elife.36828), 2018-07-16
Supplement: supp [file elife-36828-supp-v1.zip]

Archive with 14 entries (14 files):
- elife_poa_e36828_Figure_2_figure_supplement_1.pdf
- elife_poa_e36828_Figure_4_figure_supplement_2.pdf
- elife_poa_e36828_Supplementary_file_1.xlsx
- elife_poa_e36828_Figure_4_figure_supplement_1.pdf
- elife_poa_e36828_Figure_3_figure_supplement_1.pdf
- elife_poa_e36828_Figure_1_figure_supplement_1.pdf
- elife_poa_e36828_Figure_3_figure_supplement_4.pdf
- elife_poa_e36828_Figure_5_figure_supplement_1.pdf
- elife_poa_e36828_Figure_3_figure_supplement_2.pdf
- elife_poa_e36828_Figure_3_figure_supplement_3.pdf
- elife_poa_e36828_Transparent_Reporting_File.pdf
- elife_poa_e36828_Supplementary_file_2.xlsx
- elife_poa_e36828_Figure_2_source_data_1.xlsx
- elife_poa_e36828_Figure_1_figure_supplement_2.pdf
