# Supplementary material for: Hypoxia-inducible factor cell non-autonomously regulates C. elegans stress responses and behavior via a nuclear receptor
Source: eLife journal article supplement (doi:10.7554/elife.36828), 2018-07-16

**A**

| Allele       | Cloning method                          | Gene            | Mutation                       |
|--------------|-----------------------------------------|-----------------|--------------------------------|
| <i>n5666</i> | Mapping and whole-genome sequencing     | <i>cyp-36A1</i> | GGA->AGA[Gly->Arg]             |
| <i>n5668</i> | Failure to complement <i>hif-1(ia4)</i> | <i>hif-1</i>    | agGAG->aaGAG [Splice acceptor] |
| <i>n5678</i> | Failure to complement <i>hif-1(ia4)</i> | <i>hif-1</i>    | CGA->TGA[Arg->STOP]            |

**B**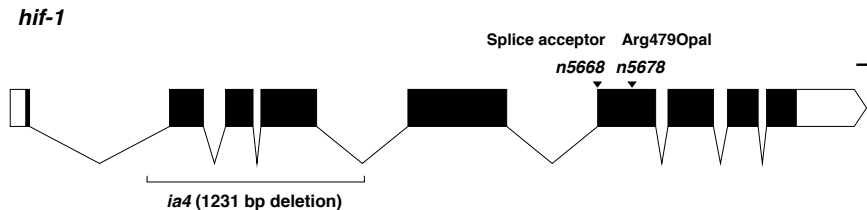**C**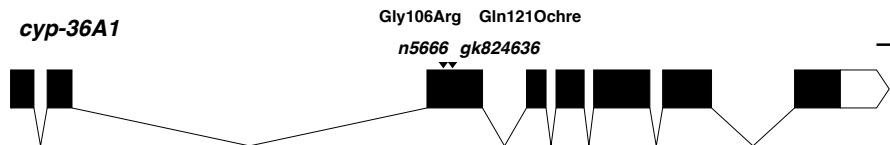

Supplement: supp [file elife-36828-supp-v1.zip › elife_poa_e36828_Figure_1_figure_supplement_1.pdf]
