# Supplementary material for: Hypoxia-inducible factor cell non-autonomously regulates C. elegans stress responses and behavior via a nuclear receptor
Source: eLife journal article supplement (doi:10.7554/elife.36828), 2018-07-16
Supplement: supp [file elife-36828-supp-v1.zip › elife_poa_e36828_Figure_2_source_data_1.xlsx]

## Sheet: Sheet1
GO term	Description	P-value	FDR q-value
GO:0002376	immune system process	2.22e-07	0.000172
GO:0006955	immune response	2.22e-07	8.58e-05
GO:0045087	innate immune response	2.22e-07	5.72e-05
GO:0006952	defense response	5e-07	9.64e-05
GO:0006950	response to stress	2.36e-06	0.000365
GO:0050896	response to stimulus	9.87e-06	0.00127
GO:0098542	defense response to other organism	0.000158	0.0175
GO:0050829	defense response to Gram-negative bacterium	0.000261	0.0251
GO:0042742	defense response to bacterium	0.000349	0.03
GO:0009617	response to bacterium	0.000349	0.027
GO:0043207	response to external biotic stimulus	0.000356	0.025
GO:0009607	response to biotic stimulus	0.000356	0.0229
GO:0009605	response to external stimulus	0.000356	0.0212
GO:0051707	response to other organism	0.000356	0.0197
GO:0051704	multi-organism process	0.00074	0.0381
