# Supplementary material for: Hypoxia-inducible factor cell non-autonomously regulates C. elegans stress responses and behavior via a nuclear receptor
Source: eLife journal article supplement (doi:10.7554/elife.36828), 2018-07-16
Supplement: supp [file elife_poa_e36828_Supplementary_file_1.xlsx]

## Sheet: egl-9(lf) downregulated genes
Supplementary File 1. Genes which were significantly differentially expressed between wild type and egl-9(lf) and at least twofold downregulated in egl-9(lf) vs. wild type
		egl-9(lf) vs. wild type				egl-9(lf) hif-1(lf) vs. egl-9(lf)				cyp-36A1(lf); egl-9(lf) vs. egl-9(lf)
gene_id	genename	log2 FC	log2 CPM	P-value	FDR	log2 FC	log2 CPM	P-value	FDR	log2 FC	log2 CPM	P-value	FDR	Suppressed by hif-1(lf)?	Suppressed by cyp-36A1(lf)?
AC3.10	spe-10	-1.56662	1.13638	0.000247259	0.00567423	2.01466	1.13638	1.43314e-06	5.07811e-05	0.352475	1.13638	0.441147	1	yes	no
AC7.3	AC7.3	-1.6335	0.390178	0.00163658	0.0285389	2.11503	0.390178	2.57984e-05	0.000689489	0.111717	0.390178	0.846688	1	yes	no
AH10.1	acs-10	-1.18011	4.0527	2.28627e-07	1.08042e-05	1.40749	4.0527	6.03601e-10	4.02606e-08	0.249638	4.0527	0.279178	1	yes	no
AH6.3	AH6.3	-1.5958	2.20165	2.24823e-06	8.70295e-05	1.72879	2.20165	2.5972e-07	1.07926e-05	0.412096	2.20165	0.239378	1	yes	no
B0025.5	B0025.5	-1.2203	3.31498	5.14169e-06	0.00018233	1.33579	3.31498	5.36575e-07	2.08489e-05	0.22114	3.31498	0.416892	1	yes	no
B0205.10	B0205.10	-1.09366	4.6571	2.75994e-08	1.53951e-06	1.36149	4.6571	4.13851e-12	3.76281e-10	0.150705	4.6571	0.44848	1	yes	no
B0207.1	B0207.1	-2.008	1.33521	1.28181e-06	5.22621e-05	2.2846	1.33521	2.3375e-08	1.18335e-06	0.749283	1.33521	0.0881499	1	yes	no
B0207.11	B0207.11	-1.32451	1.40834	0.000596776	0.0121225	1.33204	1.40834	0.00053401	0.0105857	0.274694	1.40834	0.496972	1	yes	no
B0207.7	B0207.7	-1.68084	0.956207	0.000158394	0.00384862	2.34294	0.956207	5.16675e-08	2.44673e-06	-0.206607	0.956207	0.682171	1	yes	no
B0207.9	B0207.9	-1.391	1.30547	0.000509322	0.0105921	1.48206	1.30547	0.000185576	0.00410334	0.0614327	1.30547	0.885981	1	yes	no
B0213.14	cyp-34A8	-1.05587	3.3507	5.07681e-05	0.00142015	1.05595	3.3507	4.84576e-05	0.00121844	-1.0138	3.3507	0.000278752	0.0239553	yes	no
B0213.15	cyp-34A9	-1.16165	2.24785	0.000398284	0.00858123	0.691414	2.24785	0.0373875	0.387611	0.210599	2.24785	0.533252	1	no	no
B0218.5	B0218.5	-1.67943	1.20429	5.80983e-05	0.00159686	1.82093	1.20429	1.07615e-05	0.000312806	0.919698	1.20429	0.0331588	1	yes	no
B0218.6	clec-51	-1.55419	4.78255	2.11344e-15	2.8342e-13	1.54801	4.78255	2.42224e-15	3.00048e-13	0.807383	4.78255	3.90436e-05	0.00418565	yes	yes
B0218.7	B0218.7	-1.54343	4.38843	3.56488e-13	3.91456e-11	1.66506	4.38843	3.86832e-15	4.68954e-13	0.313085	4.38843	0.14484	1	yes	no
B0222.9	gad-3	-1.40577	4.26315	8.56143e-11	7.14149e-09	1.16256	4.26315	7.82123e-08	3.54144e-06	-0.372041	4.26315	0.0969859	1	yes	no
B0244.9	B0244.9	-1.65926	2.52648	2.6402e-07	1.22102e-05	2.01269	2.52648	3.14134e-10	2.20724e-08	0.323766	2.52648	0.333508	1	yes	no
B0252.5	B0252.5	-1.21886	3.40788	3.2887e-06	0.000122648	1.28424	3.40788	8.60046e-07	3.19694e-05	0.0152624	3.40788	0.954601	1	yes	no
B0261.5	B0261.5	-1.51719	0.528981	0.00122232	0.0222539	1.31866	0.528981	0.00495755	0.0736369	-0.269986	0.528981	0.609043	1	no	no
B0261.6	B0261.6	-1.55208	4.46748	1.02145e-13	1.19373e-11	1.60773	4.46748	1.14445e-14	1.3205e-12	0.408032	4.46748	0.0526489	1	yes	no
B0272.4	B0272.4	-1.1137	2.70859	0.000288818	0.00649677	1.06547	2.70859	0.00050525	0.0100963	0.664878	2.70859	0.0314906	1	yes	no
B0273.1	B0273.1	-1.31619	3.32638	9.55231e-07	3.98036e-05	1.53513	3.32638	9.37539e-09	5.12893e-07	0.187526	3.32638	0.494763	1	yes	no
B0280.17	B0280.17	-1.22853	4.59435	9.73373e-10	6.93582e-08	1.41311	4.59435	1.82748e-12	1.72007e-10	0.388746	4.59435	0.0546983	1	yes	no
B0286.3	B0286.3	-1.42033	4.74272	4.39752e-13	4.75989e-11	1.09069	4.74272	2.54693e-08	1.28082e-06	0.564533	4.74272	0.0041455	0.231521	yes	no
B0310.5	ugt-46	-1.44341	5.18501	8.02815e-16	1.1441e-13	1.39019	5.18501	7.36609e-15	8.60848e-13	0.513524	5.18501	0.00431623	0.239292	yes	no
B0379.2	B0379.2	-1.34689	3.16973	1.14338e-06	4.69975e-05	1.38111	3.16973	5.60884e-07	2.16639e-05	0.390323	3.16973	0.165611	1	yes	no
B0379.7	B0379.7	-1.11102	4.94886	1.72105e-09	1.17127e-07	1.19475	4.94886	8.65678e-11	6.65898e-09	0.13611	4.94886	0.464432	1	yes	no
B0393.4	B0393.4	-1.686	1.00201	8.7877e-05	0.00228807	2.08883	1.00201	6.99032e-07	2.64602e-05	0.143217	1.00201	0.760719	1	yes	no
B0432.12	clec-117	-1.41809	1.54901	0.000187408	0.00444665	1.62353	1.54901	1.46559e-05	0.000414347	0.0986005	1.54901	0.806151	1	yes	no
B0491.3	rmd-3	-1.29785	5.06455	8.44582e-13	9.03425e-11	1.356	5.06455	6.98172e-14	7.48576e-12	0.323051	5.06455	0.0765937	1	yes	no
B0511.11	B0511.11	-1.32763	4.24382	1.59361e-09	1.09437e-07	1.78652	4.24382	4.2802e-16	5.65646e-14	0.328063	4.24382	0.140902	1	yes	no
B0511.4	tag-344	-1.65793	1.74427	1.03419e-05	0.000343929	2.04592	1.74427	3.20218e-08	1.5789e-06	0.761665	1.74427	0.0495968	1	yes	no
B0523.1	kin-31	-1.38166	1.52749	0.000392043	0.00847085	1.8508	1.52749	1.2677e-06	4.55579e-05	0.26133	1.52749	0.524507	1	yes	no
B0545.3	scl-23	-1.20832	1.30838	0.00201312	0.0340344	1.46013	1.30838	0.000156474	0.00350536	-0.723461	1.30838	0.099814	1	yes	no
BE10.1	BE10.1	-1.41368	2.41898	1.25054e-05	0.000408998	1.4811	2.41898	4.15284e-06	0.000131838	0.334478	2.41898	0.315729	1	yes	no
C01B4.6	C01B4.6	-1.54929	4.34203	1.0693e-12	1.1305e-10	-0.38206	4.34203	0.0941996	0.753282	0.681521	4.34203	0.0018499	0.118615	no	no
C01B4.7	C01B4.7	-1.53653	2.78173	3.53858e-07	1.60386e-05	-0.040118	2.78173	0.899322	1	0.0187148	2.78173	0.952655	1	no	no
C01B9.1	C01B9.1	-1.03432	2.93341	0.000369617	0.00808234	0.536068	2.93341	0.0670673	0.596174	0.0123688	2.93341	0.966974	1	no	no
C01F1.3	C01F1.3	-1.85313	2.3707	2.48347e-08	1.4025e-06	1.54512	2.3707	3.62323e-06	0.000117069	0.520034	2.3707	0.132594	1	yes	no
C01F6.2	C01F6.2	-1.40334	2.75375	4.33255e-06	0.000156071	1.79795	2.75375	2.85011e-09	1.71614e-07	0.270622	2.75375	0.389562	1	yes	no
C01G10.1	C01G10.1	-2.02385	2.06464	1.60524e-08	9.37992e-07	2.29153	2.06464	1.06199e-10	8.04655e-09	0.504744	2.06464	0.184344	1	yes	no
C01G10.14	C01G10.14	-1.68551	2.76369	5.38136e-08	2.85463e-06	1.96818	2.76369	1.67043e-10	1.22285e-08	0.649575	2.76369	0.0407445	1	yes	no
C01G12.13	C01G12.13	-2.2954	0.713276	4.54696e-06	0.00016302	2.43771	0.713276	7.79554e-07	2.92403e-05	0.929006	0.713276	0.0885426	1	yes	no
C01G12.3	C01G12.3	-1.09612	2.88854	0.00016136	0.00390247	1.1382	2.88854	8.36557e-05	0.00199114	0.322921	2.88854	0.273773	1	yes	no
C01G12.8	catp-4	-1.40852	5.36373	1.29524e-16	1.97593e-14	1.53411	5.36373	1.9014e-19	3.37654e-17	-0.0111116	5.36373	0.948543	1	yes	no
C01G12.9	C01G12.9	-1.3562	1.21513	0.000923692	0.0175552	1.67427	1.21513	3.20657e-05	0.000838262	0.346771	1.21513	0.419862	1	yes	no
C01G5.3	C01G5.3	-1.74113	1.00066	7.42943e-05	0.00197523	1.99495	1.00066	3.94336e-06	0.000125627	0.103159	1.00066	0.832943	1	yes	no
C01G5.4	C01G5.4	-1.64249	2.02735	3.04889e-06	0.000114456	1.87788	2.02735	7.30848e-08	3.33921e-06	0.180951	2.02735	0.628454	1	yes	no
C01G6.2	C01G6.2	-1.43714	1.15703	0.000474324	0.00994155	1.82389	1.15703	6.13808e-06	0.000189439	-0.0786532	1.15703	0.860529	1	yes	no
C01H6.8	C01H6.8	-1.17718	2.16026	0.000395403	0.00853128	0.760106	2.16026	0.0231446	0.2655	0.301226	2.16026	0.375955	1	no	no
C02B10.6	C02B10.6	-1.39691	3.25748	2.40178e-07	1.12913e-05	1.69286	3.25748	3.02779e-10	2.13075e-08	-0.284086	3.25748	0.313188	1	yes	no
C02F5.2	C02F5.2	-1.18898	1.38844	0.00213468	0.0357703	1.28609	1.38844	0.000823121	0.0155981	0.0428017	1.38844	0.916532	1	yes	no
C02F5.5	C02F5.5	-1.35595	4.29806	3.62215e-10	2.74903e-08	1.46193	4.29806	1.22914e-11	1.07457e-09	0.358572	4.29806	0.10052	1	yes	no
C03A7.11	ugt-51	-1.41993	3.45633	6.69306e-08	3.48937e-06	1.0482	3.45633	7.21266e-05	0.00174227	0.292343	3.45633	0.276826	1	yes	no
C03B8.3	C03B8.3	-1.48206	2.00165	2.31097e-05	0.000702267	1.60968	2.00165	3.63811e-06	0.000117299	0.430076	2.00165	0.235611	1	yes	no
C03C10.2	C03C10.2	-1.26953	1.48076	0.00102891	0.0192809	1.55168	1.48076	4.75657e-05	0.00119932	0.0899402	1.48076	0.826387	1	yes	no
C03C11.1	C03C11.1	-1.5566	3.00365	6.47949e-08	3.39359e-06	1.55524	3.00365	5.9064e-08	2.7653e-06	0.332237	3.00365	0.259906	1	yes	no
C03G5.11	nspc-4	-1.31907	4.32348	1.73751e-09	1.1807e-07	1.22968	4.32348	1.91648e-08	9.91182e-07	1.33619	4.32348	9.43813e-10	2.20034e-07	yes	yes
C03G5.12	nspc-5	-1.65229	1.22058	0.000189979	0.00450059	1.38205	1.22058	0.00227125	0.0378771	-0.143016	1.22058	0.780535	1	yes	no
C03G5.13	nspc-6	-1.34168	3.17763	1.92761e-06	7.60685e-05	1.27052	3.17763	6.23539e-06	0.000192051	1.20688	3.17763	1.75975e-05	0.00207254	yes	yes
C03G5.9	nspc-2	-1.34168	3.17763	1.92761e-06	7.60685e-05	1.27052	3.17763	6.23539e-06	0.000192051	1.20688	3.17763	1.75975e-05	0.00207254	yes	yes
C03G6.15	cyp-35A2	-1.70563	4.49403	9.5927e-17	1.46833e-14	0.807428	4.49403	8.45618e-05	0.00200955	-0.158589	4.49403	0.449495	1	yes	no
C04E12.2	C04E12.2	-1.65509	2.38347	8.10659e-06	0.000276677	1.74313	2.38347	2.13536e-06	7.25528e-05	2.77907	2.38347	6.8741e-15	2.69903e-12	yes	yes
C04E6.5	C04E6.5	-1.5982	1.61714	3.51602e-05	0.00102397	1.92422	1.61714	4.23925e-07	1.6935e-05	0.438471	1.61714	0.280552	1	yes	no
C04F12.12	C04F12.12	-1.60349	1.16152	0.000161641	0.00390247	1.90922	1.16152	4.81834e-06	0.000151171	0.57644	1.16152	0.198495	1	yes	no
C04F12.7	C04F12.7	-1.15055	6.73319	6.36754e-16	9.27804e-14	1.09116	6.73319	1.61276e-14	1.8148e-12	0.215092	6.73319	0.129699	1	yes	no
C04G2.2	C04G2.2	-1.37165	2.81191	4.15314e-06	0.000150204	1.31529	2.81191	9.56726e-06	0.000281331	0.386652	2.81191	0.203659	1	yes	no
C04G2.3	C04G2.3	-1.70588	3.57799	4.34085e-11	3.81701e-09	1.91315	3.57799	1.27746e-13	1.33505e-11	0.173716	3.57799	0.512721	1	yes	no
C04G2.4	msp-36	-1.27417	7.07057	1.15069e-19	2.18876e-17	1.37365	7.07057	1.43584e-22	3.09359e-20	0.46305	7.07057	0.000899182	0.0641722	yes	no
C04G2.5	C04G2.5	-1.55378	1.77361	2.25058e-05	0.000687592	1.63575	1.77361	6.82265e-06	0.000208865	0.67743	1.77361	0.0722146	1	yes	no
C04G2.8	C04G2.8	-1.34492	5.92359	1.42469e-18	2.51038e-16	1.43862	5.92359	4.60197e-21	9.05671e-19	0.387609	5.92359	0.0112029	0.496387	yes	no
C04G2.9	C04G2.9	-1.35578	7.47122	2.02698e-22	4.6776e-20	1.43332	7.47122	7.90132e-25	1.99557e-22	0.286203	7.47122	0.0378952	1	yes	no
C04G6.6	C04G6.6	-1.29961	0.974246	0.00226369	0.0375308	0.578775	0.974246	0.191036	1	0.352066	0.974246	0.43238	1	no	no
C05B5.2	C05B5.2	-1.04924	4.7776	3.69759e-08	2.02039e-06	0.958674	4.7776	4.61159e-07	1.82461e-05	0.0301532	4.7776	0.875603	1	yes	no
C05C10.4	pho-11	-1.02473	8.47637	5.85773e-14	7.02634e-12	0.828395	8.47637	1.1248e-09	7.17175e-08	0.861795	8.47637	2.37972e-10	6.07779e-08	yes	yes
C05C12.1	C05C12.1	-1.24547	2.4339	0.000101045	0.00258795	1.49447	2.4339	2.58839e-06	8.60797e-05	0.150586	2.4339	0.649346	1	yes	no
C05C12.5	C05C12.5	-1.25464	3.60731	7.47034e-07	3.18583e-05	1.30808	3.60731	2.2386e-07	9.41433e-06	0.211516	3.60731	0.411275	1	yes	no
C05D10.3	wht-1	-1.62013	1.78586	5.28763e-06	0.000187067	0.570286	1.78586	0.122804	0.891426	-0.148912	1.78586	0.698848	1	no	no
C05D11.5	C05D11.5	-1.0831	2.49502	0.00089417	0.0170726	0.950497	2.49502	0.00351348	0.0551351	0.963829	2.49502	0.00302303	0.177558	no	no
C05D2.3	basl-1	-1.16048	2.61899	0.000151637	0.00371621	0.959425	2.61899	0.00171649	0.0297496	0.0515709	2.61899	0.869897	1	yes	no
C05D2.4	bas-1	-1.14176	4.90807	1.55341e-09	1.06838e-07	1.20722	4.90807	1.52115e-10	1.11898e-08	0.615246	4.90807	0.00116206	0.0794413	yes	no
C05E11.4	amt-1	-4.33724	3.31728	1.41019e-17	2.24943e-15	5.7227	3.31728	9.35676e-36	3.83214e-33	7.01364	3.31728	2.97674e-58	1.04096e-54	yes	yes
C05E4.9	icl-1	-1.09883	7.3402	2.00758e-15	2.71626e-13	0.296828	7.3402	0.031251	0.33778	-1.9718	7.3402	2.72487e-41	4.76444e-38	no	no
C05G6.1	nhr-76	-1.30163	4.06082	1.20178e-08	7.16043e-07	1.14755	4.06082	4.75842e-07	1.87292e-05	0.275827	4.06082	0.232696	1	yes	no
C06A1.3	C06A1.3	-1.19723	3.58164	2.74754e-06	0.000104349	1.69013	3.58164	3.02471e-11	2.52305e-09	0.100839	3.58164	0.698649	1	yes	no
C06A5.2	C06A5.2	-2.03012	0.384584	0.000180961	0.00431394	2.3626	0.384584	7.81371e-06	0.0002354	1.26689	0.384584	0.025313	0.897242	yes	no
C06A8.6	C06A8.6	-1.67386	3.59896	9.01605e-11	7.50693e-09	1.97989	3.59896	1.52297e-14	1.72657e-12	0.175051	3.59896	0.508934	1	yes	no
C06B3.3	cyp-35C1	-2.36635	3.11066	3.87841e-16	5.74321e-14	1.8031	3.11066	5.82562e-10	3.90042e-08	0.255795	3.11066	0.401734	1	yes	no
C06C6.7	C06C6.7	-1.52118	1.65473	3.36615e-05	0.000983473	1.27986	1.65473	0.000493402	0.00988566	-0.171242	1.65473	0.665029	1	yes	no
C06E7.6	spe-27	-1.56796	0.291238	0.00283835	0.0454345	1.82512	0.291238	0.000375538	0.00773905	0.759271	0.291238	0.167067	1	yes	no
C06G4.4	C06G4.4	-1.20097	1.89933	0.000680403	0.0135547	1.1277	1.89933	0.00140481	0.0248499	0.391529	1.89933	0.281854	1	yes	no
C07A4.2	C07A4.2	-1.76726	0.569632	0.000158628	0.00385223	1.53215	0.569632	0.00117038	0.0212147	0.611095	0.569632	0.219544	1	yes	no
C07B5.5	nuc-1	-1.05895	6.64928	1.61136e-13	1.83135e-11	0.904283	6.64928	2.70754e-10	1.91725e-08	0.529514	6.64928	0.000215153	0.0191785	yes	yes
C07G1.6	C07G1.6	-1.11864	2.74364	0.000188947	0.00447847	1.16418	2.74364	9.6495e-05	0.00225773	0.192649	2.74364	0.529714	1	yes	no
C08F11.10	C08F11.10	-1.15926	3.17431	2.35172e-05	0.00071322	1.27676	3.17431	2.89708e-06	9.55765e-05	0.273528	3.17431	0.325885	1	yes	no
C08F11.14	C08F11.14	-1.84202	0.167893	0.000718178	0.0142014	2.44166	0.167893	3.17545e-06	0.000104155	-1.39942	0.167893	0.0614024	1	yes	no
C08F11.8	ugt-22	-1.4891	6.75853	2.78142e-25	7.438e-23	1.10611	6.75853	8.42497e-15	9.79559e-13	-0.41888	6.75853	0.00367009	0.20752	yes	no
C08F8.6	C08F8.6	-1.30005	3.6754	2.12195e-07	1.01543e-05	1.39488	3.6754	2.3581e-08	1.19246e-06	0.340526	3.6754	0.179278	1	yes	no
C09B9.2	C09B9.2	-1.38787	3.9385	4.09602e-09	2.62636e-07	1.4864	3.9385	2.67494e-10	1.89712e-08	0.124275	3.9385	0.605213	1	yes	no
C09B9.4	C09B9.4	-1.4073	3.4242	1.10442e-07	5.54787e-06	1.76501	3.4242	2.24602e-11	1.91929e-09	0.286716	3.4242	0.288452	1	yes	no
C09B9.6	msp-55	-1.01978	5.64519	1.34816e-10	1.08974e-08	1.13367	5.64519	8.77218e-13	8.5212e-11	0.141365	5.64519	0.375528	1	yes	no
C09B9.7	C09B9.7	-1.76578	1.13563	3.8695e-05	0.00111548	2.40284	1.13563	8.93183e-09	4.90991e-07	0.399707	1.13563	0.388144	1	yes	no
C09D4.3	C09D4.3	-1.539	2.91909	1.40179e-07	6.91931e-06	1.79887	2.91909	6.05228e-10	4.02845e-08	0.0183682	2.91909	0.95182	1	yes	no
C09F12.2	C09F12.2	-2.26428	1.50976	1.22419e-07	6.1157e-06	2.61788	1.50976	5.00205e-10	3.394e-08	1.40839	1.50976	0.00153502	0.101136	yes	no
C09F9.3	glna-1	-1.31173	3.84736	5.5838e-08	2.95512e-06	0.848082	3.84736	0.000460554	0.0092807	0.401666	3.84736	0.0999442	1	yes	no
C09F9.7	C09F9.7	-1.18875	3.12804	1.78563e-05	0.000562554	0.838036	3.12804	0.00253689	0.0415607	0.550785	3.12804	0.0484263	1	yes	no
C09G5.7	C09G5.7	-1.65118	1.38193	5.01822e-05	0.00140736	1.96943	1.38193	8.90279e-07	3.29049e-05	0.805553	1.38193	0.0559941	1	yes	no
C09G9.4	hdl-2	-1.46904	2.50341	4.22404e-06	0.000152525	1.65145	2.50341	1.98415e-07	8.4164e-06	0.316101	2.50341	0.337757	1	yes	no
C09H10.1	rpl-42	-1.81469	1	2.69683e-05	0.000804188	1.72592	1	6.40653e-05	0.00156922	0.429668	1	0.356073	1	yes	no
C09H10.9	C09H10.9	-1.7229	1.47761	8.2986e-06	0.000282382	1.60825	1.47761	3.11703e-05	0.000817675	0.413751	1.47761	0.31048	1	yes	no
C10C6.3	C10C6.3	-2.06257	0.932995	2.91537e-06	0.000109988	2.21536	0.932995	3.76025e-07	1.52221e-05	-0.311284	0.932995	0.54684	1	yes	no
C10F3.2	dhs-16	-6.7604	1.25955	5.08907e-21	1.06126e-18	6.76757	1.25955	3.18252e-21	6.3736e-19	5.56644	1.25955	2.53622e-12	8.00688e-10	yes	yes
C10G11.10	C10G11.10	-1.88177	0.306396	0.000511868	0.0106353	2.30889	0.306396	1.13345e-05	0.000327788	1.00379	0.306396	0.0803627	1	yes	no
C10G11.8	C10G11.8	-1.30063	6.27938	1.53528e-18	2.69481e-16	1.21464	6.27938	1.96953e-16	2.70504e-14	0.343417	6.27938	0.0200458	0.759418	yes	no
C10G11.9	C10G11.9	-1.07798	4.30717	4.87334e-07	2.16354e-05	1.22341	4.30717	1.02566e-08	5.57743e-07	0.434836	4.30717	0.0434553	1	yes	no
C10H11.7	C10H11.7	-1.00564	2.37074	0.00161406	0.0282219	1.0841	2.37074	0.000628109	0.0122551	-0.0441154	2.37074	0.893511	1	yes	no
C12C8.2	cbl-1	-1.30448	5.32095	5.68467e-14	6.85492e-12	1.35317	5.32095	5.36855e-15	6.389e-13	0.544313	5.32095	0.00174754	0.113493	yes	no
C12D5.2	nhr-152	-1.791	0.471105	0.00058852	0.0119976	1.72404	0.471105	0.000861962	0.0162139	1.22773	0.471105	0.0213558	0.795133	yes	no
C12D5.9	C12D5.9	-2.01155	1.78212	2.76506e-07	1.27487e-05	2.08582	1.78212	7.84719e-08	3.54966e-06	1.38735	1.78212	0.000502904	0.0393503	yes	yes
C12D8.9	C12D8.9	-2.1603	0.122578	0.000146684	0.0036026	2.33808	0.122578	2.86146e-05	0.000754553	0.0991328	0.122578	0.882796	1	yes	no
C13D9.8	ncx-9	-2.16492	0.0288876	0.000106654	0.00271173	2.04694	0.0288876	0.000258691	0.0055213	-1.20664	0.0288876	0.117936	1	yes	no
C14A4.13	C14A4.13	-1.4544	1.98183	2.65627e-05	0.000793928	1.60232	1.98183	3.20704e-06	0.00010504	0.0430442	1.98183	0.90639	1	yes	no
C14A4.8	C14A4.8	-1.87534	0.540811	0.000211647	0.00495707	2.06481	0.540811	3.24681e-05	0.00084732	0.877912	0.540811	0.102043	1	yes	no
C14A6.1	clec-48	-1.18324	4.85986	3.94356e-10	2.96818e-08	1.13984	4.85986	1.54767e-09	9.74498e-08	-0.00770591	4.85986	0.967972	1	yes	no
C14C10.1	C14C10.1	-1.10265	5.02939	1.28416e-09	8.94013e-08	1.13798	5.02939	3.43448e-10	2.40207e-08	0.256827	5.02939	0.159762	1	yes	no
C14C11.1	C14C11.1	-1.00509	4.12623	5.91572e-06	0.000206396	0.903373	4.12623	4.50818e-05	0.00114176	-0.0268849	4.12623	0.904975	1	yes	no
C14F5.2	zig-3	-2.16727	0.317132	7.73228e-05	0.00204252	2.13939	0.317132	9.46872e-05	0.00222326	0.915639	0.317132	0.126154	1	yes	no
C15A11.2	C15A11.2	-1.13777	1.69092	0.00153197	0.0270047	1.0435	1.69092	0.0035696	0.0559192	0.00692871	1.69092	0.985243	1	no	no
C15C6.2	C15C6.2	-1.22351	6.3585	7.52567e-17	1.15974e-14	1.23458	6.3585	3.62842e-17	5.27002e-15	0.234087	6.3585	0.110078	1	yes	no
C15F1.2	C15F1.2	-2.62647	0.13977	1.14098e-05	0.000376688	1.61946	0.13977	0.0120315	0.157083	2.00876	0.13977	0.00123544	0.0840782	no	no
C15H11.1	C15H11.1	-1.25504	2.4297	0.000111955	0.00282129	1.53895	2.4297	1.69622e-06	5.88493e-05	0.378438	2.4297	0.255548	1	yes	no
C15H7.3	C15H7.3	-1.53415	2.98424	1.23401e-07	6.15124e-06	1.6377	2.98424	1.43401e-08	7.59806e-07	0.446402	2.98424	0.132296	1	yes	no
C15H9.7	C15H9.7	-1.74966	5.54059	5.62742e-26	1.58899e-23	1.61946	5.54059	1.30465e-22	2.82432e-20	0.20692	5.54059	0.215041	1	yes	no
C16A11.7	C16A11.7	-1.8294	3.15982	1.2096e-10	9.83714e-09	1.80416	3.15982	1.86388e-10	1.36009e-08	0.591644	3.15982	0.041486	1	yes	no
C16C10.12	wht-3	-1.50837	0.570664	0.00140282	0.0250013	1.9743	0.570664	1.70094e-05	0.000474397	-0.0377498	0.570664	0.942044	1	yes	no
C16C8.18	C16C8.18	-1.55436	2.81981	1.72933e-07	8.40823e-06	1.46337	2.81981	8.16855e-07	3.05387e-05	0.291697	2.81981	0.33982	1	yes	no
C16D2.1	C16D2.1	-1.61426	2.27928	1.22933e-06	5.02576e-05	1.39922	2.27928	2.56957e-05	0.000687149	0.583455	2.27928	0.0873131	1	yes	no
C17B7.10	C17B7.10	-4.50235	0.589417	9.45525e-07	3.95078e-05	4.66823	0.589417	2.17489e-07	9.17188e-06	6.05194	0.589417	1.26895e-14	4.93057e-12	yes	yes
C17B7.3	C17B7.3	-6.09324	0.0986022	2.17214e-05	0.000665417	6.93187	0.0986022	6.09823e-08	2.8434e-06	8.23904	0.0986022	5.15364e-14	1.88943e-11	yes	yes
C17B7.4	C17B7.4	-5.32303	0.66752	2.23208e-10	1.74953e-08	5.34475	0.66752	1.51565e-10	1.11674e-08	5.67056	0.66752	2.11861e-12	6.87957e-10	yes	yes
C17B7.5	C17B7.5	-1.64276	0.765949	0.00152881	0.0269594	1.50071	0.765949	0.00400531	0.0617645	2.41987	0.765949	8.43518e-07	0.000128682	no	yes
C17B7.8	C17B7.8	-3.01119	0.622002	5.2345e-08	2.78648e-06	2.24011	0.622002	0.000118446	0.00272642	2.33062	0.622002	5.41476e-05	0.00564588	yes	yes
C17C3.19	ins-12	-2.03231	0.277378	0.000246143	0.00565719	2.20167	0.277378	5.8977e-05	0.00145873	1.20638	0.277378	0.0390829	1	yes	no
C17C3.3	C17C3.3	-3.73103	0.645305	1.02948e-09	7.3013e-08	3.27565	0.645305	1.98464e-07	8.4164e-06	2.95429	0.645305	4.35885e-06	0.000567787	yes	yes
C17C3.5	C17C3.5	-1.44903	0.52488	0.00261805	0.0425677	1.06617	0.52488	0.0297054	0.323924	0.546984	0.52488	0.280834	1	no	no
C17D12.6	spe-9	-1.44099	0.844672	0.000897724	0.0171333	1.33273	0.844672	0.00211422	0.035664	0.140255	0.844672	0.76394	1	yes	no
C17E4.1	C17E4.1	-1.48433	0.961547	0.000516388	0.0107096	1.45069	0.961547	0.000636703	0.0123962	0.0784942	0.961547	0.865443	1	yes	no
C17F3.1	C17F3.1	-1.23387	4.60303	7.56002e-10	5.47271e-08	1.40123	4.60303	2.42144e-12	2.24198e-10	0.227678	4.60303	0.260693	1	yes	no
C17F3.3	C17F3.3	-1.36294	2.54466	1.3523e-05	0.00043787	1.19853	2.54466	0.00012857	0.00294011	0.395116	2.54466	0.21728	1	yes	no
C17F4.7	C17F4.7	-1.01762	5.99368	7.17321e-11	6.12972e-09	1.22901	5.99368	2.67412e-15	3.29453e-13	1.31538	5.99368	2.59961e-17	1.27076e-14	yes	yes
C17G10.3	C17G10.3	-1.47324	2.52451	3.61176e-06	0.000133167	1.72256	2.52451	5.17822e-08	2.44961e-06	0.101056	2.52451	0.760798	1	yes	no
C17H12.12	C17H12.12	-1.05639	4.52407	1.75023e-07	8.49168e-06	1.32497	4.52407	5.19562e-11	4.13657e-09	-0.150538	4.52407	0.465178	1	yes	no
C17H12.3	C17H12.3	-1.38461	3.91508	5.64812e-09	3.55144e-07	1.52996	3.91508	1.06136e-10	8.04655e-09	0.233152	3.91508	0.333745	1	yes	no
C17H12.5	C17H12.5	-1.40657	3.29188	2.41606e-07	1.13468e-05	1.67676	3.29188	5.9647e-10	3.98766e-08	0.369829	3.29188	0.182358	1	yes	no
C18A3.7	C18A3.7	-1.28996	2.04795	0.000169745	0.00407863	1.48141	2.04795	1.33175e-05	0.000380055	0.356701	2.04795	0.312727	1	yes	no
C18C4.3	ugt-48	-1.22537	2.80059	5.96853e-05	0.00163258	1.95785	2.80059	7.64082e-11	5.94793e-09	-0.0679242	2.80059	0.831099	1	yes	no
C18E9.8	C18E9.8	-2.38094	2.07891	3.76409e-11	3.33566e-09	2.67188	2.07891	7.08882e-14	7.5827e-12	-0.0073691	2.07891	0.985272	1	yes	no
C18G1.9	C18G1.9	-1.42133	2.82072	2.04566e-06	8.03089e-05	1.32585	2.82072	8.8822e-06	0.000263745	0.460074	2.82072	0.131887	1	yes	no
C18H2.1	C18H2.1	-1.26554	2.153	0.000133756	0.00331192	1.36155	2.153	3.50317e-05	0.000906417	-0.128653	2.153	0.711644	1	yes	no
C18H2.4	C18H2.4	-2.1543	0.210188	0.000101336	0.00259394	2.49698	0.210188	3.7133e-06	0.000119234	-0.0813552	0.210188	0.902897	1	yes	no
C18H2.5	C18H2.5	-1.33637	2.26237	5.36591e-05	0.00148894	1.57569	2.26237	1.53194e-06	5.40246e-05	-0.169794	2.26237	0.628139	1	yes	no
C18H7.11	C18H7.11	-1.11495	2.33169	0.000759139	0.0148563	1.26136	2.33169	0.00012182	0.002797	0.423816	2.33169	0.209435	1	yes	no
C18H7.4	C18H7.4	-1.50041	2.92532	2.53724e-07	1.18425e-05	1.55666	2.92532	7.71807e-08	3.50521e-06	0.186224	2.92532	0.534049	1	yes	no
C18H7.7	C18H7.7	-1.22401	1.59748	0.0010693	0.0198598	1.53831	1.59748	2.98977e-05	0.000787473	-0.0501476	1.59748	0.899373	1	yes	no
C18H9.6	C18H9.6	-4.05126	3.42217	7.46361e-38	3.42731e-35	3.1416	3.42217	3.09659e-23	7.00368e-21	-0.346666	3.42217	0.379138	1	yes	no
C23G10.1	C23G10.1	-1.45056	1.77948	7.11101e-05	0.00190273	1.77783	1.77948	7.97232e-07	2.98296e-05	0.198826	1.77948	0.605066	1	yes	no
C23H4.3	C23H4.3	-1.09781	2.56647	0.000499135	0.010404	0.975431	2.56647	0.00195626	0.0333459	0.360268	2.56647	0.26221	1	yes	no
C23H4.4	C23H4.4	-2.0273	1.57427	2.05271e-07	9.87496e-06	1.46296	1.57427	0.000227377	0.00490592	0.342487	1.57427	0.417191	1	yes	no
C23H4.7	C23H4.7	-1.07113	2.89172	0.000225794	0.00525054	0.860579	2.89172	0.00306319	0.0488787	-0.0625668	2.89172	0.834495	1	yes	no
C24A11.1	C24A11.1	-1.33823	3.00459	2.71e-06	0.000103009	1.31506	3.00459	3.71386e-06	0.000119234	0.25103	3.00459	0.389351	1	yes	no
C24D10.1	C24D10.1	-1.36508	2.62072	9.64218e-06	0.000322311	1.47004	2.62072	1.6693e-06	5.81517e-05	-0.0904343	2.62072	0.778642	1	yes	no
C24D10.2	C24D10.2	-1.33519	3.65528	1.30055e-07	6.4476e-06	1.40905	3.65528	2.27279e-08	1.15316e-06	0.439976	3.65528	0.0851875	1	yes	no
C24D10.7	nspd-3	-1.28553	5.98335	2.51175e-17	3.96482e-15	1.39644	5.98335	3.46128e-20	6.42259e-18	0.259666	5.98335	0.0875283	1	yes	no
C24D10.8	nspd-6	-1.25959	3.82281	2.49056e-07	1.16485e-05	1.73734	3.82281	9.43741e-13	9.05136e-11	0.352443	3.82281	0.154337	1	yes	no
C24F3.5	abt-1	-1.58987	3.12655	1.22818e-08	7.30818e-07	1.54286	3.12655	2.92832e-08	1.45491e-06	-0.0591378	3.12655	0.838602	1	yes	no
C24G7.2	acd-1	-2.80938	0.490714	8.21609e-08	4.18266e-06	1.6196	0.490714	0.00391123	0.060438	1.15906	0.490714	0.0465732	1	no	no
C24G7.4	acd-2	-1.67944	2.35893	3.45269e-07	1.56963e-05	1.15457	2.35893	0.000509658	0.01018	0.61816	2.35893	0.0681	1	yes	no
C24H11.2	C24H11.2	-1.62926	1.18863	1.49909e-05	0.000480009	-0.540364	1.18863	0.194312	1	-1.32572	1.18863	0.00253566	0.153903	no	no
C25A8.5	C25A8.5	-1.0657	2.56839	0.000652486	0.0130672	1.50212	2.56839	1.16266e-06	4.21834e-05	0.073516	2.56839	0.818964	1	yes	no
C25D7.1	C25D7.1	-1.18006	2.66996	0.000106776	0.00271333	1.27766	2.66996	2.40034e-05	0.000646839	-0.074104	2.66996	0.814032	1	yes	no
C25D7.16	C25D7.16	-8.5901	0.0537934	6.89786e-16	9.95504e-14	8.39194	0.0537934	8.55745e-15	9.92424e-13	2.88935	0.0537934	0.155253	1	yes	no
C25D7.2	C25D7.2	-3.05156	0.048441	5.0943e-07	2.25284e-05	3.45533	0.048441	5.06092e-09	2.90132e-07	0.834894	0.048441	0.250424	1	yes	no
C25G4.6	smz-1	-1.28943	5.34959	4.49365e-14	5.46219e-12	1.49964	5.34959	1.60502e-18	2.65329e-16	0.381058	5.34959	0.026158	0.913967	yes	no
C26B2.2	C26B2.2	-1.6139	1.80307	1.02648e-05	0.000341867	1.77361	1.80307	9.75922e-07	3.58082e-05	0.40636	1.80307	0.287763	1	yes	no
C26C6.6	C26C6.6	-1.64598	0.55824	0.000640288	0.0128968	1.78729	0.55824	0.000166376	0.00371443	0.447349	0.55824	0.386662	1	yes	no
C27B7.6	C27B7.6	-1.11978	2.60426	0.000296685	0.00665726	1.41747	2.60426	3.89972e-06	0.000124411	-0.0612314	2.60426	0.848566	1	yes	no
C27C7.3	nhr-74	-6.18777	2.41554	8.32549e-31	2.74264e-28	6.5966	2.41554	4.11206e-36	1.78036e-33	5.76935	2.41554	6.03991e-26	5.08482e-23	yes	yes
C27D6.11	C27D6.11	-1.44286	2.97955	5.27401e-07	2.31479e-05	1.51105	2.97955	1.32316e-07	5.75071e-06	-0.0629022	2.97955	0.833413	1	yes	no
C27D6.3	C27D6.3	-1.4275	3.6489	1.91066e-08	1.09807e-06	1.55485	3.6489	8.24843e-10	5.38767e-08	0.285991	3.6489	0.268281	1	yes	no
C27D8.1	C27D8.1	-1.39008	4.32935	8.22902e-11	6.91496e-09	1.31206	4.32935	7.93347e-10	5.19688e-08	0.284108	4.32935	0.189059	1	yes	no
C27D8.2	C27D8.2	-1.40482	4.18881	2.37399e-10	1.84801e-08	1.43726	4.18881	8.17891e-11	6.3235e-09	0.320546	4.18881	0.152879	1	yes	no
C27D8.3	C27D8.3	-1.14833	4.2283	1.82362e-07	8.81954e-06	1.1126	4.2283	4.03864e-07	1.62048e-05	0.417065	4.2283	0.0600983	1	yes	no
C27H5.4	C27H5.4	-1.11293	4.18165	6.90393e-07	2.95536e-05	0.917021	4.18165	4.22654e-05	0.00107885	1.02687	4.18165	4.34584e-06	0.000567719	yes	yes
C28A5.6	C28A5.6	-1.10701	4.24357	3.27954e-07	1.4939e-05	1.18429	4.24357	4.28865e-08	2.06314e-06	0.0544399	4.24357	0.804506	1	yes	no
C28C12.11	C28C12.11	-1.35014	2.66329	1.03132e-05	0.000343228	1.40957	2.66329	3.75971e-06	0.000120536	0.0994773	2.66329	0.753169	1	yes	no
C28D4.4	C28D4.4	-1.23948	1.50176	0.0010334	0.0193331	1.28641	1.50176	0.000605854	0.0118719	-0.0235792	1.50176	0.952922	1	yes	no
C28D4.5	C28D4.5	-1.27077	3.88312	1.05579e-07	5.31531e-06	1.61672	3.88312	1.13345e-11	9.94745e-10	0.18435	3.88312	0.44763	1	yes	no
C28D4.7	C28D4.7	-1.322	3.60984	1.87929e-07	9.0791e-06	1.4165	3.60984	2.12768e-08	1.08438e-06	0.127668	3.60984	0.621822	1	yes	no
C28G1.1	ubc-23	-1.25793	1.64399	0.000965825	0.0182555	1.22303	1.64399	0.00128413	0.0229743	0.645931	1.64399	0.0973039	1	yes	no
C28H8.11	C28H8.11	-1.6306	4.00689	2.73571e-12	2.72141e-10	1.39418	4.00689	2.07653e-09	1.27569e-07	0.282744	4.00689	0.232426	1	yes	no
C29E4.14	C29E4.14	-2.6181	0.468833	4.99113e-07	2.21152e-05	2.73127	0.468833	1.20452e-07	5.25513e-06	0.338498	0.468833	0.582826	1	yes	no
C29E6.3	pph-2	-1.91355	1.84032	5.45817e-07	2.3882e-05	2.37321	1.84032	2.29457e-10	1.65314e-08	0.719189	1.84032	0.072598	1	yes	no
C29F9.2	C29F9.2	-1.83222	0.351958	0.000292785	0.00657623	0.919509	0.351958	0.086234	0.709735	0.993287	0.351958	0.061109	1	no	no
C30B5.3	cpb-2	-1.32159	3.01805	4.05915e-06	0.000147391	1.53937	3.01805	6.65481e-08	3.06519e-06	0.352952	3.01805	0.227831	1	yes	no
C30G12.2	C30G12.2	-5.53219	6.94554	4.30908e-218	2.44869e-214	4.72383	6.94554	2.73415e-167	8.28649e-164	1.41836	6.94554	5.68821e-17	2.72202e-14	yes	yes
C30G7.3	C30G7.3	-1.40169	4.20791	2.34157e-10	1.82591e-08	1.49325	4.20791	1.26725e-11	1.10576e-09	0.310827	4.20791	0.16453	1	yes	no
C31A11.5	oac-6	-2.30551	2.56626	2.28004e-08	1.29566e-06	2.29855	2.56626	2.02512e-08	1.04145e-06	0.75559	2.56626	0.102239	1	yes	no
C31G12.2	clec-245	-1.96525	0.363501	0.000755763	0.0148112	2.06623	0.363501	0.000328875	0.00687401	2.0532	0.363501	0.000352479	0.0289766	yes	yes
C31H1.1	C31H1.1	-1.85078	1.20059	1.87325e-05	0.000584487	2.70919	1.20059	9.37114e-11	7.16002e-09	0.359695	1.20059	0.445765	1	yes	no
C31H1.5	C31H1.5	-1.29099	3.42173	7.91855e-07	3.36121e-05	1.33347	3.42173	3.13693e-07	1.29174e-05	0.243356	3.42173	0.360029	1	yes	no
C32D5.4	C32D5.4	-1.26909	2.15402	0.000174514	0.00417776	1.58049	2.15402	2.35735e-06	7.91487e-05	0.18185	2.15402	0.605522	1	yes	no
C32E12.1	C32E12.1	-1.45248	3.42371	4.17341e-08	2.26135e-06	1.49641	3.42371	1.48099e-08	7.81965e-07	0.437751	3.42371	0.103841	1	yes	no
C32E8.4	C32E8.4	-1.06855	3.25276	7.36889e-05	0.00196249	1.27974	3.25276	1.79052e-06	6.18532e-05	0.378141	3.25276	0.164321	1	yes	no
C33A12.15	ttr-9	-1.55013	0.816309	0.000520065	0.0107711	1.65046	0.816309	0.000192383	0.00423122	0.0125567	0.816309	0.979671	1	yes	no
C33C12.4	C33C12.4	-1.605	1.05468	0.000225111	0.00523734	2.3389	1.05468	2.81363e-08	1.40407e-06	-0.00482208	1.05468	0.992076	1	yes	no
C33D12.3	twk-26	-1.14561	2.15333	0.000790776	0.015363	1.14894	2.15333	0.000732782	0.0140561	-0.396414	2.15333	0.281388	1	yes	no
C33E10.4	C33E10.4	-1.09151	3.54202	1.87569e-05	0.000584846	0.636354	3.54202	0.0129533	0.166954	-0.12576	3.54202	0.631117	1	no	no
C33F10.1	C33F10.1	-1.34016	6.07669	5.74354e-19	1.04443e-16	1.2495	6.07669	9.25707e-17	1.29888e-14	0.288192	6.07669	0.0556017	1	yes	no
C33F10.11	C33F10.11	-1.34549	4.49461	5.7773e-11	4.97428e-09	1.37112	4.49461	2.25424e-11	1.9227e-09	0.223928	4.49461	0.281143	1	yes	no
C33F10.12	C33F10.12	-1.51977	3.93706	1.63537e-10	1.29975e-08	1.74999	3.93706	1.62065e-13	1.67827e-11	0.139166	3.93706	0.566735	1	yes	no
C33F10.8	C33F10.8	-1.14405	1.558	0.00254812	0.0416247	1.71076	1.558	3.87613e-06	0.000123832	-0.0505847	1.558	0.899566	1	yes	no
C33F10.9	msp-40	-1.48809	6.78077	2.70693e-25	7.28163e-23	1.51853	6.78077	2.70542e-26	7.15063e-24	0.384106	6.78077	0.00688343	0.337825	yes	no
C33G8.3	C33G8.3	-1.926	3.39523	2.07839e-12	2.09503e-10	1.10802	3.39523	6.33515e-05	0.00155257	2.73458	3.39523	2.16904e-23	1.56518e-20	yes	yes
C33H5.16	C33H5.16	-1.55255	1.19027	0.000207392	0.00487665	2.05776	1.19027	4.72856e-07	1.86278e-05	-0.0981166	1.19027	0.831976	1	yes	no
C34B2.3	C34B2.3	-1.22257	2.45913	0.000120391	0.00301548	1.4012	2.45913	9.15963e-06	0.000271451	0.457289	2.45913	0.157565	1	yes	no
C34D4.2	C34D4.2	-1.68551	2.29752	5.36517e-07	2.35203e-05	2.17213	2.29752	6.55827e-11	5.16717e-09	0.343214	2.29752	0.32856	1	yes	no
C34D4.3	C34D4.3	-1.2669	4.7184	7.76432e-11	6.58533e-09	1.28074	4.7184	4.35488e-11	3.49783e-09	0.208734	4.7184	0.288319	1	yes	no
C34E10.9	C34E10.9	-1.40742	0.627127	0.00213818	0.0358157	1.07283	0.627127	0.0205342	0.24228	0.238543	0.627127	0.626221	1	no	no
C34E11.2	C34E11.2	-1.65534	0.291812	0.00145119	0.0257907	1.2424	0.291812	0.0196791	0.234197	0.627164	0.291812	0.260947	1	no	no
C34F11.1	C34F11.1	-2.27248	0.540944	8.34625e-06	0.000283791	2.53742	0.540944	3.81772e-07	1.54273e-05	1.02014	0.540944	0.0627884	1	yes	no
C34F11.2	C34F11.2	-1.50545	3.35711	1.7357e-08	1.00904e-06	1.512	3.35711	1.36467e-08	7.25605e-07	0.335636	3.35711	0.217127	1	yes	no
C34F11.4	msp-50	-1.41262	6.07633	9.04772e-21	1.86117e-18	1.47007	6.07633	2.14396e-22	4.49156e-20	0.24694	6.07633	0.102358	1	yes	no
C34F11.5	C34F11.5	-1.16017	4.32995	5.16592e-08	2.75643e-06	1.22905	4.32995	7.13238e-09	3.99317e-07	0.141101	4.32995	0.512883	1	yes	no
C34F11.6	msp-49	-1.49691	6.2762	9.91378e-24	2.43616e-21	1.60529	6.2762	4.94667e-27	1.33858e-24	0.235174	6.2762	0.113931	1	yes	no
C34G6.3	C34G6.3	-1.16209	2.73415	0.00012509	0.00311602	1.35247	2.73415	7.07054e-06	0.000214862	0.546172	2.73415	0.0748384	1	yes	no
C34G6.4	pgp-2	-1.00449	6.7158	1.69428e-12	1.71928e-10	0.770847	6.7158	5.69927e-08	2.67983e-06	0.221357	6.7158	0.119442	1	yes	no
C35A5.2	ugt-33	-2.77256	0.125687	2.8459e-06	0.000107815	2.5849	0.125687	1.55689e-05	0.00043771	1.49072	0.125687	0.0216535	0.802928	yes	no
C35A5.3	C35A5.3	-2.35365	2.29094	1.88271e-11	1.72561e-09	2.36457	2.29094	1.2824e-11	1.11684e-09	0.489956	2.29094	0.191986	1	yes	no
C35A5.4	C35A5.4	-1.7979	0.940335	3.57608e-05	0.0010388	2.00034	0.940335	3.21202e-06	0.000105127	-0.0337045	0.940335	0.944643	1	yes	no
C35D10.11	msd-4	-1.213	6.33809	1.48527e-16	2.25074e-14	1.14529	6.33809	5.6222e-15	6.65601e-13	0.197903	6.33809	0.177498	1	yes	no
C35D10.14	clec-5	-1.24989	4.9619	1.86289e-11	1.71089e-09	1.37684	4.9619	1.22155e-13	1.28548e-11	-0.127604	4.9619	0.5013	1	yes	no
C35D10.2	gipc-1	-1.28633	6.87039	9.9396e-20	1.9066e-17	1.29672	6.87039	4.69382e-20	8.60427e-18	0.385037	6.87039	0.00621049	0.31312	yes	no
C35E7.10	C35E7.10	-1.54108	3.5195	3.09123e-09	2.01622e-07	1.68105	3.5195	8.72864e-11	6.69161e-09	0.175169	3.5195	0.510315	1	yes	no
C35E7.9	C35E7.9	-1.39174	2.3109	2.10013e-05	0.000645967	1.55943	2.3109	1.53461e-06	5.40393e-05	0.0523964	2.3109	0.877988	1	yes	no
C36A4.1	cyp-25A1	-1.87728	2.43153	2.97952e-08	1.65589e-06	1.82057	2.43153	6.79693e-08	3.12748e-06	0.870056	2.43153	0.0123992	0.532777	yes	no
C36A4.2	cyp-25A2	-1.0591	3.2469	9.4637e-05	0.00243756	0.691024	3.2469	0.0110101	0.146068	0.439271	3.2469	0.108184	1	no	no
C36A4.3	cyp-25A3	-1.15437	3.12056	4.0569e-05	0.00116213	0.977544	3.12056	0.000518441	0.0103191	0.923424	3.12056	0.00102632	0.0712327	yes	no
C36B1.10	gska-3	-1.48082	3.67545	5.06294e-09	3.22814e-07	1.94188	3.67545	1.53872e-14	1.7401e-12	0.120211	3.67545	0.642971	1	yes	no
C36C5.5	C36C5.5	-1.98261	3.04028	1.6895e-11	1.56111e-09	1.82464	3.04028	5.47115e-10	3.6848e-08	0.681249	3.04028	0.0240139	0.866357	yes	no
C36F7.5	C36F7.5	-1.20017	2.8941	4.47601e-05	0.00126781	1.54997	2.8941	1.05077e-07	4.62877e-06	0.335656	2.8941	0.262521	1	yes	no
C36H8.1	C36H8.1	-1.43401	3.95611	1.24599e-09	8.70106e-08	1.83755	3.95611	6.25986e-15	7.37253e-13	0.0469552	3.95611	0.845853	1	yes	no
C37A2.3	acdh-5	-1.70635	3.0228	2.84745e-09	1.86524e-07	1.65314	3.0228	7.83725e-09	4.36629e-07	0.191804	3.0228	0.518405	1	yes	no
C38C10.3	C38C10.3	-1.33535	2.20993	6.63605e-05	0.00178721	1.62516	2.20993	9.05785e-07	3.34236e-05	0.400656	2.20993	0.242865	1	yes	no
C38C3.3	C38C3.3	-1.12566	3.59674	9.26175e-06	0.000311888	1.28713	3.59674	3.52254e-07	1.43622e-05	0.181831	3.59674	0.480113	1	yes	no
C38D9.5	C38D9.5	-1.56665	0.165244	0.00243776	0.0401097	1.759	0.165244	0.000527231	0.0104711	0.0542643	0.165244	0.9247	1	yes	no
C39E9.2	scl-5	-1.16549	1.99735	0.00121588	0.0221544	0.779647	1.99735	0.0326026	0.349331	0.891779	1.99735	0.0136198	0.570665	no	no
C39H7.1	C39H7.1	-1.328	5.60285	2.24002e-16	3.36084e-14	1.43584	5.60285	6.34405e-19	1.08017e-16	0.258744	5.60285	0.11108	1	yes	no
C40H1.4	elo-4	-1.34847	0.944639	0.0015387	0.027087	1.39973	0.944639	0.000895986	0.01679	-0.0931983	0.944639	0.839906	1	yes	no
C41A3.1	C41A3.1	-1.04947	3.35143	7.54207e-05	0.00200158	1.47244	3.35143	2.37238e-08	1.19834e-06	-0.5635	3.35143	0.0436586	1	yes	no
C41G7.6	C41G7.6	-1.38228	4.48738	1.89414e-11	1.72911e-09	1.61481	4.48738	4.00004e-15	4.83632e-13	0.107109	4.48738	0.608036	1	yes	no
C42C1.9	C42C1.9	-1.04884	2.68605	0.00055092	0.0113072	1.24538	2.68605	3.57713e-05	0.000924503	0.0358687	2.68605	0.908446	1	yes	no
C42D8.5	acn-1	-1.15746	2.08624	0.000596193	0.012116	1.12954	2.08624	0.000773737	0.0147739	-0.390062	2.08624	0.279831	1	yes	no
C43E11.5	C43E11.5	-1.10021	3.01132	0.00010328	0.00263777	1.3718	3.01132	1.1028e-06	4.02686e-05	0.116026	3.01132	0.688806	1	yes	no
C43F9.6	nkb-2	-1.32258	3.80563	6.56625e-08	3.43113e-06	1.63929	3.80563	1.85316e-11	1.59558e-09	0.426717	3.80563	0.084754	1	yes	no
C43G2.3	C43G2.3	-1.12317	3.25967	2.95849e-05	0.00087335	1.28669	3.25967	1.55888e-06	5.47245e-05	0.167813	3.25967	0.540094	1	yes	no
C43H6.1	trpp-12	-1.41519	3.72408	1.85123e-08	1.06936e-06	1.56952	3.72408	3.72939e-10	2.59238e-08	0.45804	3.72408	0.0721688	1	yes	no
C44B11.6	C44B11.6	-1.39716	2.35671	2.66826e-05	0.000796991	1.14263	2.35671	0.00060383	0.0118424	0.616746	2.35671	0.0691342	1	yes	no
C44B7.11	C44B7.11	-1.09104	5.25977	3.74368e-10	2.82971e-08	0.829313	5.25977	1.89177e-06	6.4956e-05	0.0685872	5.25977	0.697028	1	yes	no
C44C1.5	C44C1.5	-1.47158	6.53584	2.29807e-23	5.58677e-21	1.6017	6.53584	2.15307e-27	6.00495e-25	1.05262	6.53584	8.09177e-13	2.68511e-10	yes	yes
C44C8.2	fbxc-4	-1.85546	1.43038	8.43762e-06	0.000286256	2.14465	1.43038	1.95693e-07	8.3144e-06	0.699635	1.43038	0.116125	1	yes	no
C44C8.3	fbxc-2	-1.85546	1.43038	8.43762e-06	0.000286256	2.14465	1.43038	1.95693e-07	8.3144e-06	0.699635	1.43038	0.116125	1	yes	no
C44F1.3	lec-4	-1.01761	5.32974	2.06931e-09	1.38139e-07	0.813925	5.32974	1.57994e-06	5.54209e-05	0.0992627	5.32974	0.561236	1	yes	no
C45B11.8	C45B11.8	-1.91954	0.0933924	0.000410558	0.00882477	1.68374	0.0933924	0.00213385	0.0359284	0.814883	0.0933924	0.162799	1	yes	no
C45G9.4	C45G9.4	-2.33914	0.944751	1.25096e-07	6.22207e-06	2.48115	0.944751	1.28106e-08	6.84349e-07	-0.402682	0.944751	0.446741	1	yes	no
C45G9.9	C45G9.9	-1.29324	4.9664	2.46669e-12	2.47001e-10	1.22544	4.9664	2.92708e-11	2.4506e-09	0.294525	4.9664	0.112824	1	yes	no
C46A5.1	C46A5.1	-1.45785	2.91324	6.1183e-07	2.65409e-05	1.51162	2.91324	2.10937e-07	8.92867e-06	0.487704	2.91324	0.101469	1	yes	no
C46E10.1	C46E10.1	-1.5034	3.29146	2.72957e-08	1.52443e-06	1.608	3.29146	2.46228e-09	1.49649e-07	0.0469782	3.29146	0.866272	1	yes	no
C46F2.1	C46F2.1	-1.65408	2.99363	8.82566e-09	5.42328e-07	1.33073	2.99363	3.63271e-06	0.000117208	-0.210296	2.99363	0.487031	1	yes	no
C46G7.1	C46G7.1	-1.32828	4.27969	1.3027e-09	9.05532e-08	1.10634	4.27969	4.32128e-07	1.72476e-05	-0.390811	4.27969	0.0871397	1	yes	no
C46H11.6	C46H11.6	-1.27888	0.946403	0.0027971	0.0448849	1.63921	0.946403	9.25257e-05	0.00217944	0.128848	0.946403	0.777645	1	yes	no
C47A4.3	C47A4.3	-1.41059	2.36483	1.44534e-05	0.000466334	1.61694	2.36483	5.34886e-07	2.08189e-05	-0.0273914	2.36483	0.936017	1	yes	no
C47A4.5	C47A4.5	-1.63781	1.08276	0.000156651	0.00381441	2.16447	1.08276	3.17403e-07	1.30583e-05	0.603712	1.08276	0.186831	1	yes	no
C47D12.3	sfxn-1.4	-1.30116	1.82235	0.000266853	0.0060735	1.30175	1.82235	0.000246569	0.0052849	0.303234	1.82235	0.411793	1	yes	no
C47E12.10	C47E12.10	-2.00052	1.13803	3.59636e-06	0.000132899	2.14246	1.13803	5.15683e-07	2.01231e-05	0.535381	1.13803	0.251454	1	yes	no
C47E12.11	C47E12.11	-1.48517	2.55807	2.47725e-06	9.47965e-05	1.6671	2.55807	1.04533e-07	4.61823e-06	0.122373	2.55807	0.708881	1	yes	no
C47E8.1	C47E8.1	-1.66191	0.945101	0.000167263	0.00402538	1.87737	0.945101	1.74251e-05	0.0004848	0.799989	0.945101	0.0835745	1	yes	no
C48B6.4	C48B6.4	-1.56865	3.03464	3.87111e-08	2.10256e-06	1.61219	3.03464	1.46096e-08	7.72288e-07	0.249543	3.03464	0.395696	1	yes	no
C48E7.7	C48E7.7	-1.0939	6.27867	1.24741e-13	1.43566e-11	1.25193	6.27867	2.11884e-17	3.14786e-15	0.017354	6.27867	0.906617	1	yes	no
C48E7.8	oac-9	-1.29303	3.05737	4.07582e-06	0.000147878	1.27882	3.05737	4.99734e-06	0.000156248	0.126278	3.05737	0.661318	1	yes	no
C49C3.20	C49C3.20	-1.92852	0.0557081	0.00119493	0.0218515	2.09297	0.0557081	0.000341778	0.00711754	1.26794	0.0557081	0.0408018	1	yes	no
C49C8.1	C49C8.1	-1.6665	1.86754	3.34951e-06	0.000124711	1.5787	1.86754	9.77245e-06	0.000286808	0.293912	1.86754	0.435051	1	yes	no
C49F5.1	sams-1	-1.41224	8.61936	1.27889e-24	3.22998e-22	1.82353	8.61936	3.46107e-39	1.639e-36	0.598934	8.61936	1.08765e-05	0.00133637	yes	yes
C49F5.7	C49F5.7	-1.16139	4.60763	5.27631e-09	3.34076e-07	1.1735	4.60763	3.3104e-09	1.97758e-07	0.299543	4.60763	0.134512	1	yes	no
C49G7.1	C49G7.1	-1.59427	0.140018	0.00258852	0.0421371	1.79914	0.140018	0.000528724	0.0104913	0.108645	0.140018	0.85397	1	yes	no
C50A2.3	C50A2.3	-1.52441	1.42248	0.000132589	0.00328707	1.53786	1.42248	9.91172e-05	0.00231194	0.511679	1.42248	0.218211	1	yes	no
C50B6.7	C50B6.7	-1.48969	6.4638	3.37221e-23	8.06864e-21	1.51183	6.4638	6.56711e-24	1.58802e-21	2.18174	6.4638	4.47359e-47	9.68447e-44	yes	yes
C50C3.2	C50C3.2	-1.20808	2.65591	7.62165e-05	0.00201798	1.21494	2.65591	6.46055e-05	0.0015799	-0.0473101	2.65591	0.881153	1	yes	no
C50D2.3	C50D2.3	-1.55518	1.5978	4.93362e-05	0.00138449	1.54677	1.5978	4.93581e-05	0.00123902	0.776986	1.5978	0.047929	1	yes	no
C50E10.1	C50E10.1	-1.62684	3.74455	7.49648e-11	6.38197e-09	1.93656	3.74455	8.15099e-15	9.50134e-13	0.111527	3.74455	0.663597	1	yes	no
C50E10.2	C50E10.2	-1.9163	1.32109	3.66026e-06	0.000134518	2.11564	1.32109	2.2884e-07	9.57946e-06	0.650791	1.32109	0.138398	1	yes	no
C50F2.5	C50F2.5	-1.35009	3.24364	7.47883e-07	3.18646e-05	1.49209	3.24364	3.85738e-08	1.87351e-06	0.332799	3.24364	0.230436	1	yes	no
C50F4.10	C50F4.10	-1.18281	2.74959	8.86008e-05	0.00230165	1.41532	2.74959	2.3494e-06	7.89402e-05	0.372782	2.74959	0.22529	1	yes	no
C50F4.2	pfk-1.2	-1.47485	2.64156	2.44184e-06	9.36781e-05	1.74156	2.64156	2.04803e-08	1.05085e-06	0.434536	2.64156	0.175706	1	yes	no
C50F7.3	C50F7.3	-1.9338	2.00034	6.78906e-08	3.52728e-06	2.15108	2.00034	1.43823e-09	9.09367e-08	0.52819	2.00034	0.161476	1	yes	no
C52D10.1	C52D10.1	-4.03956	2.51045	4.74246e-23	1.11708e-20	4.01239	2.51045	5.82325e-23	1.29137e-20	3.32289	2.51045	1.41045e-15	5.88259e-13	yes	yes
C52D10.3	C52D10.3	-4.2819	1.60552	9.43059e-18	1.55335e-15	4.0449	1.60552	7.21445e-16	9.31046e-14	3.23858	1.60552	6.82933e-10	1.61702e-07	yes	yes
C52E12.6	lst-5	-1.30638	2.74273	2.21979e-05	0.000679096	1.38305	2.74273	6.18234e-06	0.000190675	0.890538	2.74273	0.00397583	0.223142	yes	no
C52E4.7	C52E4.7	-1.31473	2.60241	2.59138e-05	0.000776577	1.65826	2.60241	9.22038e-08	4.13658e-06	0.138047	2.60241	0.669921	1	yes	no
C53A3.2	C53A3.2	-1.66153	4.38181	2.75373e-15	3.63917e-13	1.15554	4.38181	3.76508e-08	1.83064e-06	-1.01974	4.38181	5.4929e-06	0.000703122	yes	no
C53A5.4	tag-191	-1.60186	0.916284	0.000285003	0.00642609	1.67073	0.916284	0.000137141	0.00311728	0.690602	0.916284	0.136106	1	yes	no
C53B4.2	C53B4.2	-1.7568	0.283904	0.00194449	0.0329599	2.93673	0.283904	2.61828e-08	1.31193e-06	0.951325	0.283904	0.112359	1	yes	no
C53D6.10	C53D6.10	-1.46154	2.87479	9.11828e-07	3.83111e-05	1.74245	2.87479	3.90988e-09	2.29055e-07	0.360872	2.87479	0.237845	1	yes	no
C54D10.4	C54D10.4	-1.13957	2.15319	0.000621204	0.0125569	1.38112	2.15319	2.77852e-05	0.000735668	-0.128113	2.15319	0.713271	1	yes	no
C54G4.2	C54G4.2	-1.23603	2.01224	0.000325912	0.00724159	1.37344	2.01224	5.80562e-05	0.00143831	0.0398145	2.01224	0.912059	1	yes	no
C54G4.3	C54G4.3	-1.21856	2.54756	0.000121921	0.00305044	1.52144	2.54756	1.25845e-06	4.52614e-05	0.453286	2.54756	0.159972	1	yes	no
C54G6.5	spp-17	-1.77109	7.60849	7.51177e-36	3.13296e-33	1.75989	7.60849	1.74147e-35	7.00609e-33	1.29263	7.60849	3.17638e-20	1.92535e-17	yes	yes
C55A6.3	C55A6.3	-1.16765	2.40627	0.000292466	0.00657232	1.43467	2.40627	7.07967e-06	0.000214996	0.0808803	2.40627	0.808451	1	yes	no
C55A6.4	C55A6.4	-2.434	3.01141	1.61012e-15	2.19155e-13	2.34185	3.01141	1.55849e-14	1.75807e-12	1.101	3.01141	0.000435925	0.0347677	yes	yes
C55A6.6	C55A6.6	-1.30434	1.47067	0.00196054	0.0332196	1.56296	1.47067	0.000153665	0.00344977	1.67442	1.47067	4.52533e-05	0.00476217	yes	yes
C55B7.10	C55B7.10	-1.35901	1.92566	0.000106416	0.00270722	1.72965	1.92566	5.98679e-07	2.28711e-05	-0.476628	1.92566	0.214408	1	yes	no
C55B7.3	C55B7.3	-1.83216	2.93787	7.75614e-10	5.59686e-08	2.19758	2.93787	1.25826e-13	1.31801e-11	-0.0004076	2.93787	0.998925	1	yes	no
C55B7.4	acdh-1	-6.48603	6.92694	2.70458e-242	3.07382e-238	6.6079	6.92694	2.55229e-250	2.90074e-246	-0.199021	6.92694	0.432105	1	yes	no
C55C3.3	C55C3.3	-1.09884	3.00384	0.000113421	0.00285665	1.42374	3.00384	4.68826e-07	1.85011e-05	0.386694	3.00384	0.179649	1	yes	no
C55C3.4	C55C3.4	-1.72233	2.33819	2.42319e-07	1.13685e-05	1.89801	2.33819	1.05432e-08	5.72647e-07	0.703664	2.33819	0.0399569	1	yes	no
C55C3.6	C55C3.6	-1.65098	0.739625	0.000235092	0.005438	1.39441	0.739625	0.0019901	0.0338467	0.367906	0.739625	0.443719	1	yes	no
C55F2.1	C55F2.1	-1.59203	5.21275	3.78506e-19	6.93841e-17	1.21674	5.21275	7.32953e-12	6.5207e-10	0.548527	5.21275	0.00212098	0.131724	yes	no
C56A3.2	ttr-44	-1.15233	5.75552	2.0062e-13	2.26876e-11	0.698094	5.75552	8.5238e-06	0.000254231	0.741736	5.75552	2.16471e-06	0.000296415	yes	yes
C56C10.6	C56C10.6	-1.15988	1.71299	0.00166496	0.0289338	1.58559	1.71299	1.17613e-05	0.000339264	0.169094	1.71299	0.65988	1	yes	no
D1005.t1	D1005.t1	-1.2858	1.1305	0.00273955	0.0441484	1.56729	1.1305	0.000206582	0.00450645	0.638677	1.1305	0.150043	1	yes	no
D1009.1	acs-22	-1.12067	5.78242	4.4878e-13	4.84608e-11	1.02248	5.78242	3.75915e-11	3.06263e-09	0.188952	5.78242	0.224456	1	yes	no
D1025.2	gcsh-1	-1.24519	4.29282	1.4988e-08	8.79186e-07	1.38772	4.29282	2.21031e-10	1.59496e-08	0.620911	4.29282	0.00490785	0.263419	yes	no
D1037.5	D1037.5	-1.49854	2.6543	1.87443e-06	7.42279e-05	1.77947	2.6543	1.22634e-08	6.58324e-07	0.62412	2.6543	0.051733	1	yes	no
D1044.1	D1044.1	-1.94384	3.35545	1.25993e-12	1.31371e-10	1.49982	3.35545	4.53078e-08	2.17043e-06	0.509437	3.35545	0.0694168	1	yes	no
D1053.1	gst-42	-1.3147	4.0724	9.58719e-09	5.8424e-07	1.33726	4.0724	4.81182e-09	2.76549e-07	0.101837	4.0724	0.662785	1	yes	no
D1054.8	D1054.8	-1.23398	3.91941	2.56216e-07	1.19099e-05	1.1743	3.91941	8.63119e-07	3.20574e-05	0.498243	3.91941	0.0390489	1	yes	no
D1081.12	D1081.12	-1.22583	2.63022	7.85851e-05	0.00207105	1.65822	2.63022	7.00011e-08	3.20475e-06	0.0715655	2.63022	0.823498	1	yes	no
D1081.5	D1081.5	-1.88421	1.92395	2.34262e-07	1.1036e-05	2.20106	1.92395	1.00231e-09	6.46327e-08	0.254777	1.92395	0.513785	1	yes	no
D1086.1	D1086.1	-1.45434	2.28664	1.80289e-05	0.000566422	1.41526	2.28664	2.79595e-05	0.000739421	0.955314	2.28664	0.0052525	0.277333	yes	no
D1086.17	D1086.17	-1.26526	4.57283	3.49129e-10	2.65414e-08	1.36576	4.57283	1.11882e-11	9.83807e-10	0.203845	4.57283	0.317251	1	yes	no
D1086.3	D1086.3	-4.00458	5.33988	7.78905e-91	9.83605e-88	4.24889	5.33988	3.81073e-101	5.58838e-98	1.03117	5.33988	3.57906e-07	5.81098e-05	yes	yes
D2023.7	col-158	-2.63021	1.07713	2.26852e-09	1.50115e-07	1.71483	1.07713	0.000169103	0.00377212	-0.255065	1.07713	0.632742	1	yes	no
D2024.2	afmd-1	-1.19051	1.78659	0.00147811	0.0262384	1.23611	1.78659	0.000867815	0.0163091	0.390033	1.78659	0.312919	1	yes	no
D2045.5	D2045.5	-1.46202	2.3013	1.11255e-05	0.000368105	1.58681	2.3013	1.55419e-06	5.46441e-05	0.605934	2.3013	0.0746991	1	yes	no
D2062.1	D2062.1	-1.88593	1.28329	1.28172e-05	0.000417394	2.51503	1.28329	2.31837e-09	1.4147e-07	1.06589	1.28329	0.0178568	0.701024	yes	no
D2062.13	D2062.13	-1.58209	1.31711	9.01433e-05	0.00233904	1.89054	1.31711	1.98918e-06	6.79925e-05	0.0213508	1.31711	0.961286	1	yes	no
D2062.4	D2062.4	-1.37899	1.16895	0.000648449	0.0130036	1.4257	1.16895	0.000374634	0.00773092	0.226952	1.16895	0.594877	1	yes	no
D2062.6	D2062.6	-1.62874	3.42039	9.66209e-10	6.90642e-08	1.70877	3.42039	1.22051e-10	9.09602e-09	0.157438	3.42039	0.565511	1	yes	no
D2062.7	D2062.7	-1.4092	4.33966	5.29268e-11	4.60058e-09	1.6676	4.33966	7.28761e-15	8.53871e-13	0.210657	4.33966	0.333445	1	yes	no
D2063.4	irld-1	-1.91347	1.89896	1.48926e-07	7.31925e-06	1.70923	1.89896	2.63603e-06	8.75998e-05	0.625115	1.89896	0.100297	1	yes	no
D2089.2	marc-2	-1.7294	1.31773	1.84866e-05	0.000578004	1.89624	1.31773	2.06725e-06	7.0555e-05	0.0997965	1.31773	0.820003	1	yes	no
D2092.7	tsp-19	-2.30923	0.264155	2.407e-05	0.000727558	2.1897	0.264155	6.11458e-05	0.00150746	0.405076	0.264155	0.52014	1	yes	no
DC2.5	DC2.5	-1.36424	1.94162	8.59816e-05	0.00224773	1.7733	1.94162	2.34007e-07	9.77773e-06	-1.0229	1.94162	0.00966195	0.445258	yes	no
DH11.1	glna-2	-1.19836	3.72124	1.63112e-06	6.50459e-05	0.957208	3.72124	0.000127352	0.00291518	0.760356	3.72124	0.00239964	0.147022	yes	no
DH11.2	DH11.2	-1.13562	4.06508	6.72523e-07	2.88975e-05	0.967284	4.06508	2.2634e-05	0.000613812	0.0672638	4.06508	0.772474	1	yes	no
DH11.3	pgp-11	-1.03263	2.80739	0.000437837	0.00929248	0.933392	2.80739	0.00144549	0.0255098	-0.0429386	2.80739	0.886918	1	yes	no
E01A2.10	E01A2.10	-1.32743	4.60582	7.01209e-11	6.00333e-09	1.45509	4.60582	7.5558e-13	7.45107e-11	1.16522	4.60582	9.48791e-09	1.91702e-06	yes	yes
E02C12.13	ttr-49	-1.23076	3.3122	4.11024e-06	0.000149008	0.963023	3.3122	0.000320302	0.00672265	0.153487	3.3122	0.57408	1	yes	no
E02H9.8	nhr-121	-1.0467	2.70523	0.000529765	0.0109471	0.901625	2.70523	0.00282327	0.0456269	0.297733	2.70523	0.331975	1	yes	no
E03A3.1	E03A3.1	-2.64288	0.74716	2.99146e-08	1.6605e-06	2.73684	0.74716	7.42618e-09	4.14235e-07	-0.546484	0.74716	0.373744	1	yes	no
E03A3.4	his-70	-1.93286	1.3817	2.29805e-06	8.87363e-05	2.22555	1.3817	3.62479e-08	1.7681e-06	0.514653	1.3817	0.240408	1	yes	no
E03H12.10	ssp-9	-1.22013	6.54228	3.90798e-17	6.08427e-15	1.48327	6.54228	1.84085e-24	4.54819e-22	0.341662	6.54228	0.0180974	0.708027	yes	no
E03H12.5	E03H12.5	-1.28509	5.50723	6.10351e-15	7.90518e-13	1.45314	5.50723	1.06501e-18	1.7932e-16	0.168725	5.50723	0.308345	1	yes	no
E03H12.7	E03H12.7	-1.4437	3.05285	3.73779e-07	1.6891e-05	1.63086	3.05285	8.0016e-09	4.43071e-07	0.268559	3.05285	0.356052	1	yes	no
E04F6.15	E04F6.15	-3.17072	2.66142	3.30629e-19	6.08532e-17	2.87573	2.66142	5.15821e-16	6.73844e-14	0.376747	2.66142	0.351743	1	yes	no
E04F6.7	dhs-7	-2.83317	2.98971	7.903e-19	1.41448e-16	2.52418	2.98971	3.27325e-15	4.01092e-13	1.85357	2.98971	1.19521e-08	2.40423e-06	yes	yes
EGAP2.3	pho-1	-1.42377	5.82658	7.44226e-20	1.45207e-17	1.1599	5.82658	9.15706e-14	9.70371e-12	0.305312	5.82658	0.0516573	1	yes	no
F01D4.1	ugt-43	-2.93242	0.295456	4.58439e-07	2.04325e-05	2.90096	0.295456	5.86346e-07	2.24565e-05	-1.19018	0.295456	0.181768	1	yes	no
F01D4.3	F01D4.3	-1.78108	0.0820474	0.00116716	0.0214644	2.3787	0.0820474	6.93722e-06	0.000211944	0.365915	0.0820474	0.548437	1	yes	no
F01G10.5	F01G10.5	-1.16063	2.35008	0.000350955	0.00771881	1.35872	2.35008	2.47777e-05	0.000664946	0.0565442	2.35008	0.866893	1	yes	no
F02C9.4	irld-3	-1.25227	2.20981	0.000159626	0.00387027	1.3902	2.20981	2.48417e-05	0.000666269	0.287336	2.20981	0.40063	1	yes	no
F02E11.1	wht-4	-1.2872	2.37067	6.45319e-05	0.00174624	1.40084	2.37067	1.19772e-05	0.000345053	0.25285	2.37067	0.445505	1	yes	no
F02E9.3	F02E9.3	-1.3613	3.19994	7.43109e-07	3.17206e-05	1.43105	3.19994	1.74843e-07	7.48479e-06	0.234522	3.19994	0.404322	1	yes	no
F07A5.2	F07A5.2	-1.18418	5.46212	9.31932e-13	9.92191e-11	1.34765	5.46212	4.11869e-16	5.45889e-14	0.136538	5.46212	0.413179	1	yes	no
F07B10.1	cln-3.1	-1.07238	2.92385	0.000237346	0.0054732	0.992357	2.92385	0.000655084	0.0126943	0.464911	2.92385	0.115112	1	yes	no
F07E5.8	F07E5.8	-1.4862	1.11783	0.000365112	0.00799151	1.72429	1.11783	2.69261e-05	0.000715841	-0.0765814	1.11783	0.866921	1	yes	no
F07F6.1	F07F6.1	-1.41624	2.67318	4.40279e-06	0.000158476	1.86768	2.67318	1.06493e-09	6.83793e-08	0.0338736	2.67318	0.916199	1	yes	no
F07G11.9	lmd-4	-1.60685	0.243801	0.00295599	0.047091	1.49105	0.243801	0.00582966	0.0849976	0.760603	0.243801	0.182419	1	no	no
F07H5.9	pho-13	-1.02912	4.60804	3.09543e-07	1.41571e-05	1.09797	4.60804	4.30863e-08	2.07055e-06	0.469511	4.60804	0.0200826	0.760177	yes	no
F08A8.2	F08A8.2	-2.2157	4.49763	5.40857e-25	1.42127e-22	1.84517	4.49763	6.20728e-18	9.83237e-16	1.03965	4.49763	1.35624e-06	0.000197616	yes	yes
F08A8.3	F08A8.3	-1.38469	5.18018	3.83872e-14	4.69118e-12	1.69004	5.18018	2.11622e-20	3.99193e-18	1.15662	5.18018	2.47113e-10	6.24113e-08	yes	yes
F08A8.8	F08A8.8	-1.34511	0.715687	0.00283039	0.0453551	1.39141	0.715687	0.00181169	0.031162	0.0466854	0.715687	0.923575	1	yes	no
F08B4.2	cdh-5	-1.01444	5.55589	3.64407e-10	2.76105e-08	1.04247	5.55589	1.0883e-10	8.20488e-09	0.0637883	5.55589	0.695303	1	yes	no
F08F8.6	F08F8.6	-1.6939	0.478188	0.000618008	0.0125114	2.03197	0.478188	2.60222e-05	0.000695063	-0.0900404	0.478188	0.872531	1	yes	no
F08G5.2	acl-13	-1.43766	2.33152	1.15972e-05	0.000382043	1.72326	2.33152	1.18638e-07	5.19595e-06	0.168559	2.33152	0.62232	1	yes	no
F08H9.2	F08H9.2	-1.00341	5.74525	1.1438e-10	9.386e-09	1.03483	5.74525	2.7442e-11	2.31026e-09	0.206964	5.74525	0.185168	1	yes	no
F08H9.5	clec-227	-1.36104	2.2578	0.000152484	0.00372771	1.07584	2.2578	0.00292676	0.0469987	1.42551	2.2578	6.12826e-05	0.00634617	yes	yes
F08H9.8	clec-54	-1.0121	2.56144	0.00169512	0.0294072	0.677912	2.56144	0.0369474	0.384451	0.955215	2.56144	0.00293598	0.173341	no	no
F09C12.8	F09C12.8	-1.47939	2.87232	6.33454e-07	2.7348e-05	1.76943	2.87232	2.03404e-09	1.25297e-07	0.392456	2.87232	0.197032	1	yes	no
F09C8.1	F09C8.1	-2.58799	1.85512	2.91874e-11	2.6275e-09	2.88104	1.85512	7.12192e-14	7.60022e-12	-1.62777	1.85512	0.00262611	0.158969	yes	no
F09E10.1	F09E10.1	-1.69132	1.03709	9.04266e-05	0.00234372	1.27545	1.03709	0.00351317	0.0551351	0.114247	1.03709	0.808288	1	no	no
F09F3.9	cpt-5	-1.21911	5.5763	5.73012e-14	6.89145e-12	1.2929	5.5763	1.40942e-15	1.78478e-13	-0.289388	5.5763	0.0796269	1	yes	no
F09F7.6	F09F7.6	-1.20492	3.03297	1.70387e-05	0.000540541	0.504002	3.03297	0.0768315	0.657343	-0.542225	3.03297	0.0677958	1	no	no
F10A3.4	F10A3.4	-1.10413	3.95375	3.93318e-06	0.000143504	1.09883	3.95375	4.17493e-06	0.000132354	1.13802	3.95375	1.80747e-06	0.000253609	yes	yes
F10C1.3	F10C1.3	-1.98486	1.68221	3.9315e-07	1.76961e-05	2.25433	1.68221	5.33591e-09	3.0322e-07	0.743779	1.68221	0.0711103	1	yes	no
F10C2.3	F10C2.3	-1.11981	3.52148	1.58681e-05	0.000506586	0.875032	3.52148	0.000773779	0.0147739	0.218465	3.52148	0.408487	1	yes	no
F10D11.4	F10D11.4	-1.77752	0.147697	0.000791368	0.015368	1.83384	0.147697	0.000470989	0.00947417	-0.156467	0.147697	0.798868	1	yes	no
F10D11.5	F10D11.5	-1.0957	1.84384	0.0021423	0.0358715	1.57435	1.84384	7.01224e-06	0.000213805	0.130943	1.84384	0.723402	1	yes	no
F10D2.9	fat-7	-1.8336	5.88475	1.42794e-26	4.10857e-24	4.95045	5.88475	8.83207e-167	2.50947e-163	-0.530862	5.88475	0.00525961	0.277387	yes	no
F10F2.2	F10F2.2	-1.15052	5.47016	3.41592e-12	3.36128e-10	0.708336	5.47016	1.81219e-05	0.000501637	0.201287	5.47016	0.225746	1	yes	no
F10F2.6	F10F2.6	-2.24224	0.492102	1.98332e-05	0.000615871	2.41252	0.492102	3.12169e-06	0.00010254	0.862274	0.492102	0.135774	1	yes	no
F10F2.7	clec-151	-1.17737	3.13381	2.28512e-05	0.000696272	1.69455	3.13381	8.18347e-10	5.35293e-08	0.128047	3.13381	0.652647	1	yes	no
F10F2.8	clec-153	-1.39999	2.64597	6.16324e-06	0.000214374	1.70489	2.64597	3.00346e-08	1.48896e-06	0.0504885	2.64597	0.875357	1	yes	no
F10G7.12	F10G7.12	-1.96304	0.183047	0.000277973	0.00629957	2.09227	0.183047	8.30085e-05	0.00197884	0.400787	0.183047	0.506031	1	yes	no
F10G8.1	F10G8.1	-1.79672	1.99746	5.80222e-07	2.53386e-05	2.27816	1.99746	1.30266e-10	9.69236e-09	0.393766	1.99746	0.300701	1	yes	no
F10G8.2	F10G8.2	-1.87949	0.746486	4.42509e-05	0.00125652	1.86091	0.746486	4.72714e-05	0.00119323	0.61678	0.746486	0.211436	1	yes	no
F11A5.15	F11A5.15	-3.25797	0.13563	1.4225e-07	7.01391e-06	3.41262	0.13563	2.61429e-08	1.31179e-06	1.24521	0.13563	0.089018	1	yes	no
F11A5.9	F11A5.9	-1.02677	5.18432	3.72849e-09	2.40087e-07	0.537601	5.18432	0.00206005	0.0349186	-0.748257	5.18432	3.31735e-05	0.00361655	yes	no
F11C7.2	F11C7.2	-1.22173	1.67178	0.00181736	0.0311182	1.70938	1.67178	7.93524e-06	0.000238587	1.03647	1.67178	0.00826355	0.392959	yes	no
F11D5.7	F11D5.7	-1.09494	2.39357	0.00124796	0.0226345	1.75317	2.39357	1.20353e-07	5.25513e-06	1.11464	2.39357	0.000923846	0.0657261	yes	no
F11E6.3	F11E6.3	-1.22638	10.2653	2.62922e-19	4.87865e-17	1.10653	10.2653	4.41034e-16	5.79476e-14	0.746175	10.2653	3.51875e-08	6.58295e-06	yes	yes
F11G11.4	F11G11.4	-1.30825	2.64585	2.29266e-05	0.000697633	1.44576	2.64585	2.50593e-06	8.35819e-05	0.250796	2.64585	0.428524	1	yes	no
F11G11.8	nspd-5	-1.15848	5.47559	2.90375e-12	2.86972e-10	1.49936	5.47559	1.62021e-19	2.89986e-17	0.260479	5.47559	0.117956	1	yes	no
F11G11.9	mpst-4	-2.38464	1.81853	3.39093e-10	2.58216e-08	2.43326	1.81853	1.21203e-10	9.04761e-09	0.34411	1.81853	0.409812	1	yes	no
F11H8.3	col-8	-1.79924	9.61488	1.91003e-38	8.95176e-36	1.68499	9.61488	3.75702e-34	1.44744e-31	0.81148	9.61488	2.25876e-09	4.91319e-07	yes	yes
F12A10.4	nep-5	-1.45213	0.965304	0.00078254	0.015229	1.65068	0.965304	0.000104665	0.00243013	0.381908	0.965304	0.40333	1	yes	no
F13A7.1	F13A7.1	-1.16986	4.78959	9.92746e-10	7.05175e-08	1.30367	4.78959	8.7387e-12	7.69903e-10	0.242565	4.78959	0.208506	1	yes	no
F13A7.7	F13A7.7	-1.58951	0.671213	0.000676294	0.0134906	2.18913	0.671213	1.38745e-06	4.93545e-05	-0.555126	0.671213	0.313023	1	yes	no
F13B12.2	F13B12.2	-1.08509	2.45384	0.000626857	0.0126431	0.755149	2.45384	0.0177256	0.215519	-0.153266	2.45384	0.642915	1	no	no
F13D12.9	F13D12.9	-1.62142	3.13943	8.91496e-09	5.45796e-07	2.0941	3.13943	8.76614e-14	9.33297e-12	-0.259421	3.13943	0.384664	1	yes	no
F13E9.13	F13E9.13	-2.72796	0.192017	4.01183e-06	0.000146044	3.00344	0.192017	2.27274e-07	9.52267e-06	0.0729439	0.192017	0.922549	1	yes	no
F13E9.5	F13E9.5	-1.62406	2.4118	5.89943e-07	2.57384e-05	1.75011	2.4118	6.31357e-08	2.92879e-06	0.416652	2.4118	0.215064	1	yes	no
F13G11.2	irld-4	-1.67894	1.62202	1.79779e-05	0.000565861	2.058	1.62202	9.75073e-08	4.33736e-06	0.999669	1.62202	0.0128076	0.544663	yes	no
F13H6.3	F13H6.3	-1.56894	4.17917	2.22428e-12	2.23219e-10	1.15048	4.17917	2.63762e-07	1.09406e-05	0.511949	4.17917	0.0231968	0.847709	yes	no
F13H8.3	F13H8.3	-1.08226	2.91845	0.000161403	0.00390247	0.97083	2.91845	0.00070018	0.0134877	-0.0762173	2.91845	0.796294	1	yes	no
F13H8.8	F13H8.8	-1.33259	1.97432	0.00014417	0.00355043	1.39267	1.97432	6.229e-05	0.00153151	-0.016736	1.97432	0.963962	1	yes	no
F14B6.6	F14B6.6	-1.12105	1.60265	0.00277034	0.0445183	0.689611	1.60265	0.0698831	0.613904	0.300425	1.60265	0.438249	1	no	no
F14D7.6	F14D7.6	-2.60412	2.79214	1.6753e-15	2.27346e-13	2.13568	2.79214	7.74022e-11	6.01501e-09	0.425425	2.79214	0.228247	1	yes	no
F14E5.3	acp-3	-1.45299	2.40108	7.34505e-06	0.000252773	1.55253	2.40108	1.50416e-06	5.3173e-05	0.27484	2.40108	0.41327	1	yes	no
F14F7.4	F14F7.4	-1.75065	1.9091	1.27258e-06	5.19326e-05	1.91252	1.9091	9.03153e-08	4.0692e-06	0.523464	1.9091	0.164951	1	yes	no
F14H3.10	cyp-35D1	-3.47875	0.288033	4.92317e-08	2.64241e-06	3.80586	0.288033	9.51716e-10	6.16324e-08	1.65346	0.288033	0.0258996	0.908503	yes	no
F14H3.11	nhr-176	-1.10322	2.56186	0.000459903	0.00967947	0.836923	2.56186	0.00802206	0.111629	0.288588	2.56186	0.36944	1	no	no
F14H3.2	best-12	-1.61424	0.530789	0.000822754	0.0158825	1.88936	0.530789	6.74119e-05	0.00164146	0.130296	0.530789	0.806831	1	yes	no
F15A2.1	col-184	-2.93808	9.78031	4.22987e-91	5.49411e-88	2.84739	9.78031	2.61361e-86	3.49463e-83	-0.0991866	9.78031	0.467064	1	yes	no
F15B9.3	far-5	-1.54765	2.3964	2.2286e-06	8.65935e-05	1.45081	2.3964	8.79555e-06	0.000261685	0.403583	2.3964	0.231867	1	yes	no
F15E11.1	pud-2.1	-2.90576	9.5662	3.5466e-89	4.13416e-86	3.30453	9.5662	3.87931e-111	6.78297e-108	1.42564	9.5662	6.96536e-25	5.45952e-22	yes	yes
F15E11.10	srbc-15	-6.67937	1.46844	1.03654e-32	3.83106e-30	1.68086	1.46844	0.0494696	0.475764	1.30315	1.46844	0.144892	1	no	no
F15E11.12	F15E11.12	-5.13844	6.663	3.90647e-178	1.77592e-174	5.36788	6.663	3.21876e-192	1.33025e-188	3.32994	6.663	9.33781e-80	5.30633e-76	yes	yes
F15E11.14	pud-2.2	-2.90576	9.5662	3.5466e-89	4.13416e-86	3.30453	9.5662	3.87931e-111	6.78297e-108	1.42564	9.5662	6.96536e-25	5.45952e-22	yes	yes
F15E11.15	F15E11.15	-5.39761	8.6515	9.10313e-228	6.89729e-224	5.71125	8.6515	1.20391e-248	1.09462e-244	3.60097	8.6515	3.68184e-116	3.34761e-112	yes	yes
F15E6.3	F15E6.3	-2.16602	3.01533	1.09486e-13	1.27624e-11	1.92871	3.01533	4.32244e-11	3.47792e-09	0.237847	3.01533	0.434968	1	yes	no
F15E6.4	F15E6.4	-3.47823	0.860755	1.58633e-12	1.61334e-10	3.20011	0.860755	1.18455e-10	8.85706e-09	-0.363783	0.860755	0.588483	1	yes	no
F15H10.4	tag-314	-1.6209	1.42814	5.70417e-05	0.00156972	1.83641	1.42814	3.77773e-06	0.000121029	0.730516	1.42814	0.079818	1	yes	no
F15H10.7	F15H10.7	-1.57917	3.24607	1.42302e-06	5.7351e-05	1.23339	3.24607	0.000197864	0.00433917	0.267022	3.24607	0.452049	1	yes	no
F16B4.12	nhr-117	-2.34218	2.92781	3.33656e-14	4.09955e-12	1.99649	2.92781	1.16466e-10	8.73709e-09	0.870327	2.92781	0.00647073	0.322197	yes	no
F16C3.4	F16C3.4	-1.8512	1.69853	1.13968e-06	4.68877e-05	2.12766	1.69853	1.56368e-08	8.1897e-07	0.318331	1.69853	0.433392	1	yes	no
F16H6.7	F16H6.7	-1.7731	0.872235	0.000327846	0.00726446	2.14802	0.872235	7.84655e-06	0.000236077	1.82489	0.872235	0.000186617	0.0168664	yes	yes
F17A9.4	F17A9.4	-1.17995	4.40911	3.66237e-08	2.00596e-06	0.896274	4.40911	2.85815e-05	0.000754116	1.40926	4.40911	3.72729e-11	1.05904e-08	yes	yes
F17A9.5	F17A9.5	-1.92181	4.21574	2.91146e-17	4.54838e-15	1.90876	4.21574	3.92561e-17	5.66547e-15	1.12484	4.21574	7.89448e-07	0.000121247	yes	yes
F17C11.6	F17C11.6	-1.15147	2.6733	0.000177352	0.00423679	1.14392	2.6733	0.000186244	0.00411612	0.310589	2.6733	0.322018	1	yes	no
F17C8.7	F17C8.7	-1.56188	3.4895	3.36572e-09	2.17651e-07	1.6657	3.4895	2.47339e-10	1.77268e-08	0.611381	3.4895	0.0222187	0.820538	yes	no
F17E9.5	F17E9.5	-1.44596	6.241	3.1097e-22	7.10403e-20	1.61891	6.241	2.11595e-27	5.93785e-25	0.243668	6.241	0.101622	1	yes	no
F18A12.1	nep-6	-1.56498	2.0243	4.53471e-06	0.000162709	1.55139	2.0243	5.19032e-06	0.000161725	-0.0690406	2.0243	0.849355	1	yes	no
F18A12.4	nep-8	-1.5372	2.79874	2.99537e-07	1.37132e-05	1.71004	2.79874	1.01563e-08	5.52955e-07	-0.0584886	2.79874	0.852199	1	yes	no
F18C5.4	mpz-3	-1.35663	2.53508	1.76582e-05	0.00055784	1.56868	2.53508	5.74417e-07	2.2074e-05	0.233205	2.53508	0.473766	1	yes	no
F18G5.4	lgc-4	-1.67606	1.77363	5.71925e-06	0.000200465	1.27653	1.77363	0.000601694	0.0118056	0.571821	1.77363	0.136206	1	yes	no
F19B6.4	wht-5	-1.44398	2.54842	4.75237e-06	0.000169849	1.64971	2.54842	1.40305e-07	6.09209e-06	-0.0421116	2.54842	0.898549	1	yes	no
F19C6.4	F19C6.4	-1.00822	3.20563	0.000188117	0.00446114	1.00691	3.20563	0.000181196	0.00402017	-0.260464	3.20563	0.349607	1	yes	no
F19C6.5	F19C6.5	-1.42506	1.45554	0.000287685	0.00647448	1.35364	1.45554	0.000547596	0.0108424	0.0446314	1.45554	0.915595	1	yes	no
F20D6.11	F20D6.11	-1.3735	4.14755	1.08251e-09	7.65351e-08	0.440309	4.14755	0.0530518	0.501724	0.284665	4.14755	0.212422	1	no	no
F20D6.5	F20D6.5	-1.93733	2.73663	7.08039e-10	5.15011e-08	1.6964	2.73663	6.65471e-08	3.06519e-06	1.33108	2.73663	2.59398e-05	0.00292618	yes	yes
F20D6.6	F20D6.6	-1.11064	3.42316	2.18408e-05	0.000668621	1.26825	3.42316	1.11811e-06	4.07294e-05	0.11258	3.42316	0.672809	1	yes	no
F20H11.4	F20H11.4	-1.25008	3.3957	2.3546e-06	9.05605e-05	1.31143	3.3957	6.69787e-07	2.54644e-05	0.133955	3.3957	0.620764	1	yes	no
F21A10.1	ncs-4	-1.20253	1.37271	0.00232057	0.0383899	0.942107	1.37271	0.0176496	0.214709	0.467215	1.37271	0.250421	1	no	no
F21C10.9	F21C10.9	-2.82763	2.46978	2.09444e-15	2.81702e-13	3.42915	2.46978	3.80991e-22	7.87284e-20	0.271237	2.46978	0.500062	1	yes	no
F21D9.2	F21D9.2	-1.30144	2.74884	1.45838e-05	0.000469544	1.40405	2.74884	2.65766e-06	8.82542e-05	0.119464	2.74884	0.699448	1	yes	no
F21F3.2	F21F3.2	-1.81976	1.96398	4.40847e-07	1.96677e-05	2.02303	1.96398	1.48928e-08	7.83614e-07	0.652478	1.96398	0.0820079	1	yes	no
F21H7.2	F21H7.2	-1.47225	3.4389	2.69738e-08	1.51199e-06	1.63493	3.4389	5.69814e-10	3.8207e-08	0.487155	3.4389	0.0698388	1	yes	no
F21H7.5	F21H7.5	-1.15325	6.03167	2.03188e-14	2.5446e-12	1.30458	6.03167	4.845e-18	7.81059e-16	0.325346	6.03167	0.0309555	1	yes	no
F22A3.6	ilys-5	-2.11736	8.7409	7.66981e-51	4.84274e-48	2.12314	8.7409	4.03151e-51	2.61824e-48	2.1405	8.7409	6.92072e-52	1.85072e-48	yes	yes
F22B3.8	F22B3.8	-1.53844	1.54517	5.59022e-05	0.00154022	1.66586	1.54517	1.04801e-05	0.000305212	0.195163	1.54517	0.629081	1	yes	no
F22B5.5	F22B5.5	-1.53915	2.4451	3.09953e-06	0.000116165	1.86067	2.4451	1.25819e-08	6.72922e-07	0.529902	2.4451	0.119329	1	yes	no
F22B8.6	cth-1	-1.8892	3.27992	2.95326e-10	2.27171e-08	2.03956	3.27992	6.80057e-12	6.10989e-10	2.15795	3.27992	3.42014e-13	1.1779e-10	yes	yes
F22D3.4	F22D3.4	-1.6841	0.978754	0.00010292	0.00263151	1.73584	0.978754	5.29449e-05	0.00132349	0.341318	0.978754	0.464223	1	yes	no
F22E10.2	pgp-13	-1.7061	1.86236	2.85515e-06	0.000108075	1.7828	1.86236	8.69564e-07	3.224e-05	-0.212849	1.86236	0.596148	1	yes	no
F22E10.3	pgp-14	-1.48147	4.89826	8.61025e-15	1.09952e-12	1.30702	4.89826	6.92308e-12	6.20769e-10	0.644334	4.89826	0.000778762	0.0568271	yes	no
F22E5.1	F22E5.1	-2.89627	0.826735	2.96966e-09	1.93971e-07	3.17953	0.826735	3.68371e-11	3.01196e-09	-0.373081	0.826735	0.556809	1	yes	no
F22H10.6	F22H10.6	-1.54442	2.75607	5.9897e-07	2.60822e-05	1.41504	2.75607	4.57721e-06	0.000144103	0.752866	2.75607	0.0164666	0.660714	yes	no
F23A7.4	F23A7.4	-1.0329	5.82592	1.9298e-11	1.75775e-09	0.936472	5.82592	1.06826e-09	6.8497e-08	0.502305	5.82592	0.00108801	0.0750559	yes	no
F23B12.1	F23B12.1	-1.90705	1.36897	3.29172e-06	0.00012266	2.20467	1.36897	4.93255e-08	2.35051e-06	0.394537	1.36897	0.373278	1	yes	no
F23B2.11	pcp-3	-1.58291	6.2857	6.67588e-26	1.87341e-23	1.22203	6.2857	3.23622e-16	4.33988e-14	1.11874	6.2857	7.52469e-14	2.6725e-11	yes	yes
F23B2.7	F23B2.7	-1.31953	1.65295	0.000401355	0.0086433	1.83244	1.65295	5.66195e-07	2.18134e-05	-0.378444	1.65295	0.353303	1	yes	no
F23C8.7	F23C8.7	-1.58782	2.15303	3.64932e-06	0.000134225	1.83684	2.15303	6.60913e-08	3.05343e-06	0.397774	2.15303	0.26618	1	yes	no
F23D12.11	F23D12.11	-3.52284	5.059	7.77425e-67	6.31117e-64	3.43795	5.059	4.79924e-64	4.54538e-61	1.278	5.059	4.66001e-10	1.12685e-07	yes	yes
F23F12.13	F23F12.13	-1.66151	1.99008	7.91535e-06	0.000270849	1.72651	1.99008	3.12782e-06	0.000102667	0.669673	1.99008	0.0849695	1	yes	no
F25B3.4	F25B3.4	-1.25051	1.57376	0.00105271	0.0196137	1.51798	1.57376	5.60298e-05	0.00139494	0.0257477	1.57376	0.949505	1	yes	no
F25C8.1	F25C8.1	-4.06127	1.43322	5.04514e-17	7.80126e-15	3.90546	1.43322	7.89423e-16	1.01378e-13	1.0299	1.43322	0.0860849	1	yes	no
F25F2.1	F25F2.1	-1.23748	2.98824	1.48083e-05	0.000474755	1.26643	2.98824	8.56683e-06	0.000255214	0.412021	2.98824	0.155349	1	yes	no
F25H5.7	F25H5.7	-1.07057	2.08152	0.00146647	0.0260418	1.27433	2.08152	0.000131822	0.00300993	-0.117491	2.08152	0.738618	1	yes	no
F26A1.4	F26A1.4	-2.74176	0.0769623	9.38783e-06	0.000315432	3.30003	0.0769623	2.87025e-08	1.42762e-06	0.975518	0.0769623	0.174269	1	yes	no
F26A3.5	F26A3.5	-1.68627	2.40089	2.46355e-07	1.1534e-05	2.11326	2.40089	6.86034e-11	5.37721e-09	-0.565903	2.40089	0.116674	1	yes	no
F26B1.8	F26B1.8	-1.17729	5.67039	1.14315e-13	1.32573e-11	1.16259	5.67039	2.07933e-13	2.13383e-11	0.26405	5.67039	0.0969558	1	yes	no
F26C11.1	F26C11.1	-2.59583	3.35894	4.44594e-19	8.11715e-17	2.22311	3.35894	2.10899e-14	2.34417e-12	1.76923	3.35894	1.51265e-09	3.42122e-07	yes	yes
F26D2.10	F26D2.10	-1.71828	2.60557	5.79081e-08	3.05401e-06	1.70376	2.60557	6.48912e-08	3.00409e-06	0.415958	2.60557	0.203531	1	yes	no
F26E4.5	F26E4.5	-1.25767	2.59134	5.93336e-05	0.00162492	1.47492	2.59134	2.19014e-06	7.3862e-05	0.27764	2.59134	0.38838	1	yes	no
F26F4.2	F26F4.2	-1.37608	3.88843	8.88051e-09	5.44827e-07	1.55483	3.88843	6.9861e-11	5.46635e-09	0.303783	3.88843	0.210012	1	yes	no
F26G1.7	msp-3	-1.531	5.84467	6.84677e-23	1.59621e-20	1.78815	5.84467	1.48234e-30	4.84812e-28	0.517101	5.84467	0.000869227	0.0626137	yes	no
F27C1.1	F27C1.1	-1.19114	6.52437	2.08535e-16	3.13914e-14	1.27215	6.52437	1.66216e-18	2.73781e-16	0.344735	6.52437	0.0170967	0.678215	yes	no
F27C1.3	F27C1.3	-1.44592	1.95219	4.49235e-05	0.00127086	1.648	1.95219	2.69052e-06	8.92649e-05	0.194858	1.95219	0.601078	1	yes	no
F27C8.5	F27C8.5	-1.35875	3.41725	2.57601e-07	1.19498e-05	1.64863	3.41725	3.513e-10	2.44946e-08	0.202229	3.41725	0.452995	1	yes	no
F27E5.3	F27E5.3	-1.84039	0.326121	0.000432581	0.00919382	2.51741	0.326121	5.62248e-07	2.16981e-05	0.0317768	0.326121	0.957784	1	yes	no
F28A12.4	asp-13	-1.65853	7.00624	5.06772e-31	1.68163e-28	1.87646	7.00624	5.85388e-39	2.74354e-36	0.657706	7.00624	3.52475e-06	0.000468534	yes	yes
F28D1.3	thn-1	-3.15122	0.282978	9.48172e-07	3.9582e-05	3.18255	0.282978	5.87879e-07	2.24963e-05	1.83504	0.282978	0.0101081	0.460909	yes	no
F28D1.5	thn-2	-2.43807	5.66047	7.31325e-46	4.26241e-43	2.63481	5.66047	3.71251e-53	2.59653e-50	2.08972	5.66047	1.78346e-34	2.31651e-31	yes	yes
F28E10.4	F28E10.4	-2.213	1.77965	4.13221e-09	2.64584e-07	2.00987	1.77965	9.67956e-08	4.31414e-06	0.446543	1.77965	0.27017	1	yes	no
F28F5.6	F28F5.6	-1.10224	2.66517	0.000377105	0.00820267	1.01732	2.66517	0.000998915	0.0184675	0.655032	2.66517	0.0355868	1	yes	no
F28H1.5	F28H1.5	-1.46271	1.05618	0.000414797	0.00890324	1.32421	1.05618	0.00139564	0.0246972	0.0184345	1.05618	0.967196	1	yes	no
F28H7.6	irld-6	-1.31659	1.58005	0.000488216	0.0102186	1.55528	1.58005	3.04168e-05	0.000799295	-0.358094	1.58005	0.385876	1	yes	no
F29B9.7	F29B9.7	-1.32759	2.0424	0.000109711	0.00276939	1.26115	2.0424	0.00022733	0.00490592	0.328633	2.0424	0.354024	1	yes	no
F30A10.12	F30A10.12	-1.63061	2.37293	7.97791e-07	3.38324e-05	1.78928	2.37293	5.16601e-08	2.44673e-06	0.531628	2.37293	0.118819	1	yes	no
F30F8.2	glna-3	-1.02894	3.83929	1.84102e-05	0.000576014	1.18131	3.83929	7.8766e-07	2.94957e-05	0.190395	3.83929	0.433526	1	yes	no
F31E8.5	F31E8.5	-1.62419	3.74331	7.3184e-11	6.24206e-09	1.74499	3.74331	2.28522e-12	2.12017e-10	0.206681	3.74331	0.416813	1	yes	no
F31F7.1	F31F7.1	-1.46868	5.81629	1.17421e-21	2.56637e-19	1.065	5.81629	3.32131e-12	3.04416e-10	-1.057	5.81629	4.2034e-11	1.1869e-08	yes	no
F32A11.3	F32A11.3	-1.67183	5.28837	1.40593e-21	3.05812e-19	1.96853	5.28837	3.30754e-29	1.00243e-26	0.161505	5.28837	0.361312	1	yes	no
F32B4.2	F32B4.2	-1.76098	2.66527	2.57108e-08	1.44838e-06	2.25325	2.66527	7.06487e-13	6.9973e-11	0.529035	2.66527	0.104934	1	yes	no
F32B5.1	F32B5.1	-1.86086	4.62475	9.39693e-20	1.81014e-17	2.3209	4.62475	1.17856e-29	3.64479e-27	0.237455	4.62475	0.25521	1	yes	no
F32B5.4	F32B5.4	-1.15821	4.28425	7.64007e-08	3.91573e-06	1.2938	4.28425	1.7327e-09	1.08499e-07	0.246122	4.28425	0.257892	1	yes	no
F32B5.8	cpz-1	-1.09596	9.09441	8.94036e-16	1.25444e-13	1.02762	9.09441	4.35769e-14	4.73936e-12	0.456277	9.09441	0.000737039	0.0543056	yes	no
F32B6.4	F32B6.4	-1.80496	3.79563	3.54995e-13	3.90761e-11	1.7935	3.79563	4.38109e-13	4.43583e-11	0.363484	3.79563	0.150438	1	yes	no
F32B6.5	sss-1	-1.15457	6.58362	1.07001e-15	1.48757e-13	1.20563	6.58362	5.37663e-17	7.68639e-15	0.218486	6.58362	0.128374	1	yes	no
F32B6.6	msp-77	-1.25652	6.89144	5.95281e-19	1.07817e-16	1.38796	6.89144	9.84263e-23	2.15123e-20	0.396777	6.89144	0.00474899	0.258556	yes	no
F32D8.9	spp-16	-1.01255	4.06005	1.13665e-05	0.000375531	0.976504	4.06005	2.17106e-05	0.000591009	0.563476	4.06005	0.0148765	0.614259	yes	no
F32G8.6	cat-4	-1.56921	4.00524	1.70848e-11	1.57544e-09	0.783615	4.00524	0.000808651	0.0153688	-0.505882	4.00524	0.0384732	1	yes	no
F32H2.7	F32H2.7	-1.31641	5.03934	5.8681e-13	6.30661e-11	1.55656	5.03934	1.55146e-17	2.32009e-15	0.272026	5.03934	0.13953	1	yes	no
F33D11.2	F33D11.2	-1.79924	1.57683	3.23361e-06	0.000120692	1.92245	1.57683	5.45314e-07	2.11271e-05	0.748858	1.57683	0.062896	1	yes	no
F33D11.7	F33D11.7	-1.59474	2.38058	1.34978e-06	5.47879e-05	1.84474	2.38058	1.76673e-08	9.18962e-07	0.508293	2.38058	0.135465	1	yes	no
F34D10.8	F34D10.8	-1.10135	3.51697	1.8808e-05	0.00058604	1.41453	3.51697	3.28771e-08	1.61756e-06	0.0216232	3.51697	0.934386	1	yes	no
F34D10.9	F34D10.9	-1.47178	2.73682	1.39822e-06	5.65017e-05	1.61536	2.73682	9.97245e-08	4.423e-06	0.527408	2.73682	0.0897184	1	yes	no
F35C11.2	F35C11.2	-1.50005	1.74955	6.6289e-05	0.00178721	1.80539	1.74955	1.08603e-06	3.97199e-05	0.592087	1.74955	0.127835	1	yes	no
F35C5.1	F35C5.1	-1.74472	0.503719	0.000534009	0.0110198	1.83201	0.503719	0.000232841	0.00501193	1.18879	0.503719	0.0215326	0.799751	yes	no
F35D11.10	clec-139	-1.74013	1.87509	2.29713e-06	8.87363e-05	1.98118	1.87509	5.45934e-08	2.57456e-06	0.428185	1.87509	0.270439	1	yes	no
F35E12.8	F35E12.8	-1.50129	2.60501	2.38587e-06	9.1608e-05	1.4026	2.60501	9.96519e-06	0.000292087	-1.23288	2.60501	0.000822437	0.0595363	yes	no
F35E2.5	F35E2.5	-1.75858	0.247989	0.00103699	0.0193905	2.31902	0.247989	7.09927e-06	0.000215447	0.293303	0.247989	0.624203	1	yes	no
F35E2.6	oac-19	-1.56897	1.21573	0.0001183	0.00296965	1.63395	1.21573	5.12702e-05	0.00128348	-0.100062	1.21573	0.822572	1	yes	no
F35E2.9	F35E2.9	-1.5833	2.94537	5.47054e-08	2.89856e-06	1.61012	2.94537	2.85169e-08	1.4215e-06	0.120902	2.94537	0.68861	1	yes	no
F35E8.8	gst-38	-1.55523	1.04325	0.000179575	0.00428539	1.37007	1.04325	0.000922461	0.0172505	-1.47695	1.04325	0.0044631	0.245045	yes	no
F35F10.1	F35F10.1	-3.32076	2.73054	3.6354e-21	7.65133e-19	3.52183	2.73054	9.60022e-24	2.29703e-21	2.35163	2.73054	5.34144e-11	1.47168e-08	yes	yes
F35F10.13	F35F10.13	-4.85757	1.15035	5.26993e-12	5.14112e-10	4.98378	1.15035	7.84076e-13	7.64912e-11	5.38382	1.15035	1.11249e-15	4.72663e-13	yes	yes
F35F10.5	F35F10.5	-6.79433	3.35835	6.6049e-37	2.88717e-34	6.79882	3.35835	4.85798e-37	2.14416e-34	7.67005	3.35835	9.5257e-52	2.40582e-48	yes	yes
F35F11.2	F35F11.2	-1.53607	0.452052	0.00165702	0.0288399	1.1076	0.452052	0.0262455	0.294313	0.686297	0.452052	0.179718	1	no	no
F35H8.4	F35H8.4	-1.21289	1.52061	0.00141108	0.0251369	1.31661	1.52061	0.000459691	0.00927152	0.385485	1.52061	0.324403	1	yes	no
F36A2.10	F36A2.10	-1.10147	4.69971	1.6222e-08	9.45472e-07	1.34978	4.69971	4.01495e-12	3.65779e-10	0.179493	4.69971	0.361794	1	yes	no
F36A2.11	F36A2.11	-1.25628	2.33337	0.0001227	0.00306487	1.27668	2.33337	8.66163e-05	0.00205194	0.39445	2.33337	0.238094	1	yes	no
F36A2.12	F36A2.12	-1.07916	3.12069	0.000107	0.00271597	1.36354	3.12069	8.25339e-07	3.08305e-05	0.245886	3.12069	0.384913	1	yes	no
F36A2.14	F36A2.14	-1.59888	3.43913	1.79139e-09	1.21008e-07	1.6383	3.43913	6.42168e-10	4.25563e-08	0.474283	3.43913	0.0795516	1	yes	no
F36A4.2	F36A4.2	-1.25277	1.36835	0.0014408	0.025626	1.60609	1.36835	3.18929e-05	0.000835186	0.108732	1.36835	0.793276	1	yes	no
F36A4.3	F36A4.3	-1.62575	0.290364	0.00127375	0.0229969	1.40014	0.290364	0.00561686	0.0821847	0.132209	0.290364	0.811247	1	no	no
F36A4.4	F36A4.4	-1.58553	2.62414	5.16575e-07	2.27779e-05	1.86167	2.62414	2.93441e-09	1.76215e-07	0.154708	2.62414	0.6387	1	yes	no
F36D1.4	F36D1.4	-1.90954	1.96731	1.54138e-07	7.55907e-06	2.10439	1.96731	5.3929e-09	3.06076e-07	0.621312	1.96731	0.103393	1	yes	no
F36D3.4	F36D3.4	-1.08628	4.36838	2.26179e-07	1.06996e-05	1.00788	4.36838	1.49492e-06	5.29289e-05	0.266873	4.36838	0.206763	1	yes	no
F36D3.5	F36D3.5	-1.42755	2.65632	4.62295e-06	0.000165614	1.81479	2.65632	4.4018e-09	2.56552e-07	0.0458892	2.65632	0.887994	1	yes	no
F36D3.8	F36D3.8	-1.36099	3.00339	2.13712e-06	8.36105e-05	1.45088	3.00339	3.92646e-07	1.58105e-05	0.456205	3.00339	0.118376	1	yes	no
F36G9.12	oac-20	-2.61037	3.51307	2.50429e-18	4.27998e-16	2.55856	3.51307	8.25678e-18	1.27241e-15	1.50822	3.51307	9.20422e-07	0.000139014	yes	yes
F36G9.13	F36G9.13	-1.81056	1.04958	3.39773e-05	0.000992062	2.10667	1.04958	9.57354e-07	3.51837e-05	0.0908804	1.04958	0.852641	1	yes	no
F36G9.3	F36G9.3	-2.05344	2.43951	1.42248e-09	9.83605e-08	2.4023	2.43951	9.35842e-13	8.99457e-11	1.16365	2.43951	0.000783629	0.0569993	yes	no
F36H1.3	F36H1.3	-1.17373	2.57026	0.000171585	0.00411415	1.61801	2.57026	1.69377e-07	7.27791e-06	0.054598	2.57026	0.865553	1	yes	no
F36H12.10	F36H12.10	-1.9014	2.48869	1.78515e-08	1.03646e-06	2.34436	2.48869	2.95e-12	2.72028e-10	0.993875	2.48869	0.00428617	0.238207	yes	no
F36H12.3	F36H12.3	-1.41087	3.2901	2.33834e-07	1.10273e-05	1.62067	3.2901	2.41778e-09	1.47141e-07	0.538347	3.2901	0.0516536	1	yes	no
F36H12.4	F36H12.4	-1.78476	2.09472	2.81928e-07	1.2959e-05	1.86505	2.09472	6.56056e-08	3.03407e-06	0.472348	2.09472	0.192355	1	yes	no
F36H12.5	F36H12.5	-1.44966	2.92054	7.77075e-07	3.30155e-05	1.64215	2.92054	1.79797e-08	9.34142e-07	0.382103	2.92054	0.202824	1	yes	no
F36H12.7	msp-19	-1.22122	7.1838	2.43589e-18	4.19462e-16	1.24669	7.1838	4.60848e-19	7.96601e-17	0.467679	7.1838	0.000757969	0.0556673	yes	no
F36H12.8	ttbk-2	-1.69142	3.37906	3.27067e-10	2.49476e-08	1.78014	3.37906	3.21632e-11	2.66333e-09	0.305076	3.37906	0.269122	1	yes	no
F36H12.9	F36H12.9	-1.33241	2.4877	3.12458e-05	0.0009188	1.77463	2.4877	2.13337e-08	1.08606e-06	0.264056	2.4877	0.422539	1	yes	no
F37A4.4	F37A4.4	-1.54452	3.9943	3.55802e-11	3.17159e-09	1.63768	3.9943	1.98385e-12	1.85571e-10	0.0730742	3.9943	0.759276	1	yes	no
F37A4.5	F37A4.5	-1.63386	2.80455	6.7301e-08	3.50394e-06	1.87402	2.80455	4.90406e-10	3.33748e-08	0.264689	2.80455	0.39851	1	yes	no
F37A8.1	F37A8.1	-1.8811	1.10855	1.11009e-05	0.00036756	2.05253	1.10855	1.23053e-06	4.43624e-05	0.645422	1.10855	0.155718	1	yes	no
F37B4.7	folt-2	-1.44662	6.09068	3.52332e-21	7.44993e-19	1.68614	6.09068	3.52641e-28	1.041e-25	-0.85901	6.09068	8.13952e-08	1.45681e-05	yes	no
F37C12.18	F37C12.18	-1.58992	2.35154	2.17125e-06	8.47274e-05	1.91806	2.35154	7.9872e-09	4.43071e-07	0.909727	2.35154	0.00769132	0.369614	yes	no
F37E3.3	comp-1	-1.65894	3.06605	6.40401e-09	3.99908e-07	1.7622	3.06605	6.03984e-10	4.02606e-08	0.39522	3.06605	0.177425	1	yes	no
F37H8.4	sfxn-1.2	-2.16875	1.76518	2.33138e-08	1.32153e-06	2.37192	1.76518	6.52844e-10	4.32008e-08	0.828768	1.76518	0.0433225	1	yes	no
F38A5.11	irld-7	-1.64503	0.0179216	0.0025876	0.0421371	1.80032	0.0179216	0.000829349	0.0156919	0.202573	0.0179216	0.739533	1	yes	no
F38A5.6	F38A5.6	-1.26456	1.51005	0.000907093	0.0172628	1.32031	1.51005	0.000488116	0.00979702	0.314658	1.51005	0.426932	1	yes	no
F38E1.3	F38E1.3	-1.57774	1.85558	1.21254e-05	0.00039829	1.73093	1.85558	1.31401e-06	4.71107e-05	0.317295	1.85558	0.402156	1	yes	no
F38H4.4	F38H4.4	-1.59992	3.32214	4.86723e-09	3.10771e-07	1.86756	3.32214	7.03305e-12	6.29389e-10	0.452681	3.32214	0.105242	1	yes	no
F38H4.6	F38H4.6	-1.50544	1.3753	0.000158814	0.00385469	1.68835	1.3753	1.78457e-05	0.000494986	0.464113	1.3753	0.265031	1	yes	no
F39E9.4	nep-13	-1.26834	2.34207	8.76298e-05	0.00228425	1.47615	2.34207	4.09672e-06	0.000130238	-0.102169	2.34207	0.762705	1	yes	no
F39G3.1	ugt-61	-1.30568	2.75896	1.49975e-05	0.000480009	1.31007	2.75896	1.2783e-05	0.000366874	0.276782	2.75896	0.369661	1	yes	no
F40E12.2	F40E12.2	-1.28153	1.97652	0.000214693	0.00501549	1.58932	1.97652	3.42294e-06	0.00011115	-0.0416311	1.97652	0.909224	1	yes	no
F40E3.5	F40E3.5	-1.31483	1.92768	0.000215134	0.00502323	1.69472	1.92768	1.29057e-06	4.63434e-05	0.467374	1.92768	0.200785	1	yes	no
F40F12.3	F40F12.3	-1.95554	2.84164	1.53439e-10	1.22808e-08	2.17838	2.84164	7.8398e-13	7.64912e-11	0.282228	2.84164	0.376836	1	yes	no
F40F9.3	F40F9.3	-1.34091	3.9726	9.81856e-09	5.95149e-07	1.39414	3.9726	2.26514e-09	1.38594e-07	0.318157	3.9726	0.178907	1	yes	no
F40G12.10	F40G12.10	-1.28041	3.11881	5.09919e-06	0.000181105	1.44597	3.11881	2.24184e-07	9.41925e-06	0.362708	3.11881	0.204655	1	yes	no
F40H6.1	F40H6.1	-1.60283	3.1045	1.36459e-08	8.06706e-07	1.66217	3.1045	3.44949e-09	2.05055e-07	0.367177	3.1045	0.203596	1	yes	no
F41B5.4	cyp-33C3	-1.06677	2.73657	0.000417944	0.00894545	1.24564	2.73657	3.39363e-05	0.000880079	0.287853	2.73657	0.350151	1	yes	no
F41B5.6	F41B5.6	-1.0383	2.00865	0.00262713	0.0426694	0.86702	2.00865	0.0119489	0.156182	0.189313	2.00865	0.594516	1	no	no
F41E6.15	F41E6.15	-1.40385	4.45824	2.88091e-11	2.60376e-09	1.19479	4.45824	1.43272e-08	7.59806e-07	0.830124	4.45824	8.65745e-05	0.00865809	yes	yes
F41G3.4	fis-1	-1.63491	2.17236	2.33424e-06	8.98536e-05	2.15943	2.17236	2.67424e-10	1.89712e-08	0.55341	2.17236	0.123512	1	yes	no
F41G3.5	F41G3.5	-1.32507	2.7431	1.22617e-05	0.000402187	1.39627	2.7431	3.71007e-06	0.000119234	0.132291	2.7431	0.672569	1	yes	no
F41H10.2	F41H10.2	-1.04796	4.8095	3.50251e-08	1.92537e-06	1.03929	4.8095	4.20639e-08	2.02785e-06	0.362435	4.8095	0.0575038	1	yes	no
F41H10.5	F41H10.5	-1.23583	1.34569	0.00214898	0.0359436	1.56699	1.34569	7.53621e-05	0.00181176	0.284524	1.34569	0.500337	1	yes	no
F42A10.3	anmt-2	-1.03867	5.45016	4.42646e-10	3.31518e-08	0.954531	5.45016	9.28612e-09	5.08622e-07	0.207151	5.45016	0.215849	1	yes	no
F42A10.7	F42A10.7	-1.29396	6.09734	1.04716e-17	1.68811e-15	1.32619	6.09734	1.4506e-18	2.42447e-16	0.381047	6.09734	0.011594	0.506314	yes	no
F42A10.9	F42A10.9	-1.74148	3.1989	8.35437e-10	5.99997e-08	1.56807	3.1989	3.16991e-08	1.56468e-06	0.609773	3.1989	0.0355082	1	yes	no
F42A9.3	F42A9.3	-1.29475	1.67118	0.000548634	0.0112653	1.77976	1.67118	1.31509e-06	4.71122e-05	0.311695	1.67118	0.424301	1	yes	no
F42A9.7	F42A9.7	-1.8445	3.06834	1.68627e-10	1.33786e-08	1.91596	3.06834	2.80944e-11	2.36081e-09	0.525821	3.06834	0.0760026	1	yes	no
F42C5.5	F42C5.5	-1.56284	2.9421	9.5784e-08	4.84365e-06	1.55698	2.9421	9.53358e-08	4.25743e-06	0.398226	2.9421	0.184503	1	yes	no
F42G4.2	F42G4.2	-1.28357	2.65045	2.93421e-05	0.000866745	1.51256	2.65045	7.26415e-07	2.74054e-05	-0.129302	2.65045	0.686992	1	yes	no
F42G4.6	F42G4.6	-1.15394	3.04882	5.24121e-05	0.00145731	1.58283	3.04882	2.20292e-08	1.12021e-06	0.551036	3.04882	0.0557503	1	yes	no
F42G8.9	irld-8	-1.21898	2.18604	0.000241204	0.00555773	1.42173	2.18604	1.53414e-05	0.000431848	-0.0566348	2.18604	0.870443	1	yes	no
F43C1.5	F43C1.5	-1.36428	1.2318	0.00101353	0.0190555	0.95483	1.2318	0.0227868	0.262322	0.792967	1.2318	0.060518	1	no	no
F43C9.1	F43C9.1	-1.51016	1.66766	0.000123725	0.00308709	1.49575	1.66766	0.000126588	0.00290209	0.647536	1.66766	0.112497	1	yes	no
F43E2.5	msra-1	-2.26106	5.08274	2.29871e-32	8.36012e-30	3.09115	5.08274	1.37455e-57	1.13615e-54	0.556174	5.08274	0.00411246	0.230242	yes	no
F43G6.6	jmjd-1.1	-1.4312	1.37148	0.000299591	0.00671915	1.7115	1.37148	1.15307e-05	0.000332822	0.0322115	1.37148	0.939492	1	yes	no
F43G9.6	fer-1	-1.10924	2.4405	0.000446726	0.00945027	1.29982	2.4405	3.36921e-05	0.000875245	-0.267854	2.4405	0.418554	1	yes	no
F43G9.8	F43G9.8	-1.86849	0.270775	0.000460797	0.00968932	2.12826	0.270775	4.30337e-05	0.00109661	0.567222	0.270775	0.3284	1	yes	no
F44A6.5	F44A6.5	-2.28914	0.855177	1.31133e-06	5.33725e-05	2.55335	0.855177	4.68158e-08	2.23796e-06	0.137691	0.855177	0.803704	1	yes	no
F44D12.3	msd-1	-1.05685	6.05228	1.47337e-12	1.50858e-10	0.999514	6.05228	2.05185e-11	1.75667e-09	0.324557	6.05228	0.0296724	0.997243	yes	no
F44D12.4	gipc-2	-1.19227	7.33586	1.03177e-17	1.66923e-15	1.21747	7.33586	2.04673e-18	3.35908e-16	0.270016	7.33586	0.0507417	1	yes	no
F44D12.5	msd-2	-1.37738	6.6209	1.44157e-21	3.12072e-19	1.3831	6.6209	8.98293e-22	1.82309e-19	0.306526	6.6209	0.032912	1	yes	no
F44D12.6	F44D12.6	-1.43992	1.08106	0.000678058	0.0135172	1.91334	1.08106	3.68423e-06	0.000118534	0.0300953	1.08106	0.94767	1	yes	no
F44D12.7	msd-3	-2.35993	3.47602	8.42788e-16	1.19731e-13	3.25901	3.47602	2.67709e-29	8.22318e-27	-0.993015	3.47602	0.00488234	0.26267	yes	no
F44D12.8	F44D12.8	-1.56149	2.32012	2.56093e-06	9.78339e-05	1.92144	2.32012	5.05879e-09	2.90132e-07	0.0613727	2.32012	0.860877	1	yes	no
F44F4.3	F44F4.3	-1.46308	0.438555	0.0026926	0.0435927	1.09438	0.438555	0.0268204	0.299574	0.365309	0.438555	0.481409	1	no	no
F44G3.7	F44G3.7	-1.57387	2.42511	6.49808e-07	2.79744e-05	-0.380458	2.42511	0.259824	1	0.389832	2.42511	0.22923	1	no	no
F44G4.5	F44G4.5	-1.29548	1.87616	0.000232211	0.0053805	1.32724	1.87616	0.000148785	0.00335014	0.355409	1.87616	0.327356	1	yes	no
F45D11.1	F45D11.1	-1.3457	4.43722	1.33284e-10	1.08007e-08	1.13061	4.43722	6.30882e-08	2.92879e-06	0.885069	4.43722	2.36439e-05	0.00270749	yes	yes
F45D3.2	F45D3.2	-1.50105	2.77332	5.93629e-07	2.58744e-05	1.2119	2.77332	5.77509e-05	0.00143231	0.443112	2.77332	0.149556	1	yes	no
F45E1.4	F45E1.4	-1.44831	2.82336	8.2431e-07	3.48919e-05	0.959899	2.82336	0.00113745	0.020659	-0.35635	2.82336	0.249964	1	yes	no
F45E4.6	F45E4.6	-1.47685	1.22727	0.000318237	0.00709186	1.58422	1.22727	9.41437e-05	0.00221296	0.504112	1.22727	0.238502	1	yes	no
F45H11.4	mgl-2	-1.90868	2.90452	3.01254e-10	2.31339e-08	1.54872	2.90452	3.41397e-07	1.39571e-05	1.03227	2.90452	0.00079453	0.0576999	yes	no
F46A8.10	scrm-6	-1.71114	2.09847	4.91224e-07	2.17868e-05	1.436	2.09847	2.46447e-05	0.000661768	0.391837	2.09847	0.267782	1	yes	no
F46B3.4	ttr-12	-1.38441	2.07679	6.35607e-05	0.00172612	1.66305	2.07679	1.16551e-06	4.22531e-05	0.280909	2.07679	0.434835	1	yes	no
F46F5.6	F46F5.6	-1.29657	2.13433	9.42339e-05	0.00243131	0.945349	2.13433	0.00453324	0.0684897	-0.0636931	2.13433	0.854396	1	no	no
F47B10.2	haly-1	-1.04689	4.88112	1.59855e-08	9.35286e-07	0.913639	4.88112	7.71279e-07	2.89778e-05	-0.712612	4.88112	0.000197934	0.0177832	yes	no
F47B3.1	F47B3.1	-1.283	3.02306	4.70241e-06	0.000168195	0.959137	3.02306	0.000622498	0.0121718	0.0891677	3.02306	0.756203	1	yes	no
F47B3.4	F47B3.4	-1.16388	3.1826	2.32392e-05	0.000705729	1.55359	3.1826	1.30299e-08	6.95251e-07	-0.111614	3.1826	0.694523	1	yes	no
F47B3.6	F47B3.6	-5.43646	0.490944	8.09456e-09	5.00663e-07	7.32876	0.490944	3.81202e-20	7.04464e-18	4.4815	0.490944	1.96618e-05	0.00227441	yes	yes
F47B3.7	F47B3.7	-1.20576	3.80753	6.1184e-07	2.65409e-05	1.30016	3.80753	6.93261e-08	3.18026e-06	0.145194	3.80753	0.55439	1	yes	no
F47B8.11	sss-2	-1.89761	5.06127	1.47213e-24	3.69749e-22	2.12507	5.06127	2.63939e-30	8.50989e-28	0.301098	5.06127	0.108325	1	yes	no
F47C10.6	ugt-32	-1.82176	1.42214	2.09645e-05	0.000645273	1.83491	1.42214	1.59883e-05	0.000448669	1.2358	1.42214	0.00478246	0.259446	yes	no
F47C12.4	clec-79	-1.01466	4.16685	3.97708e-06	0.00014499	1.1115	4.16685	3.96438e-07	1.5935e-05	-0.042343	4.16685	0.84971	1	yes	no
F47D12.7	F47D12.7	-1.47884	3.90472	6.21773e-10	4.5591e-08	1.63064	3.90472	8.18995e-12	7.25776e-10	0.342474	3.90472	0.158209	1	yes	no
F47F6.5	clec-119	-1.79641	2.44787	3.17861e-08	1.75155e-06	1.97594	2.44787	9.15061e-10	5.9428e-08	0.108605	2.44787	0.751248	1	yes	no
F47G4.3	gpdh-1	-1.9182	1.70707	7.61486e-08	3.90721e-06	1.08402	1.70707	0.00271252	0.0440879	-1.94252	1.70707	1.85555e-05	0.00215743	yes	no
F47G6.3	F47G6.3	-1.79858	0.985827	4.2939e-05	0.00122386	1.96731	0.985827	5.88556e-06	0.000182016	-0.0258029	0.985827	0.958383	1	yes	no
F47G9.3	cutl-18	-2.88754	1.54193	6.30462e-11	5.40781e-09	2.79501	1.54193	2.37784e-10	1.70772e-08	1.75859	1.54193	0.000158527	0.0145887	yes	yes
F47H4.12	F47H4.12	-1.68427	0.589656	0.000739779	0.014557	1.76682	0.589656	0.000353806	0.00734447	0.738761	0.589656	0.16346	1	yes	no
F48C1.7	spe-11	-1.54681	4.49744	1.01868e-13	1.19356e-11	1.69729	4.49744	2.91503e-16	3.94405e-14	0.462031	4.49744	0.027661	0.949054	yes	no
F48E8.1	lon-1	-1.42876	5.48212	9.73643e-18	1.59219e-15	1.11984	5.48212	1.57202e-11	1.36385e-09	0.251309	5.48212	0.133361	1	yes	no
F48F5.2	F48F5.2	-1.55201	2.12981	4.52517e-06	0.000162495	1.51864	2.12981	6.55541e-06	0.00020109	-0.285253	2.12981	0.434946	1	yes	no
F49C12.15	F49C12.15	-1.11	6.46667	2.17565e-14	2.70239e-12	1.29476	6.46667	5.31902e-19	9.12482e-17	0.234198	6.46667	0.106652	1	yes	no
F49C12.7	F49C12.7	-1.07841	4.17801	1.61997e-06	6.46579e-05	0.912186	4.17801	4.971e-05	0.00124717	1.26964	4.17801	1.40166e-08	2.78256e-06	yes	yes
F49E11.7	F49E11.7	-1.42669	1.36642	0.00037284	0.00813714	1.73634	1.36642	1.08927e-05	0.000316216	0.456142	1.36642	0.276376	1	yes	no
F49E12.2	dod-23	-1.03073	6.02866	1.03367e-11	9.78997e-10	0.845459	6.02866	2.29712e-08	1.16421e-06	0.485492	6.02866	0.00135411	0.0911991	yes	no
F49E12.4	ubc-24	-1.4674	0.858113	0.00138006	0.0246615	1.59818	0.858113	0.00041819	0.00851347	0.794417	0.858113	0.0943179	1	yes	no
F49E12.9	F49E12.9	-1.90723	2.38711	2.61955e-08	1.47385e-06	1.95914	2.38711	8.07939e-09	4.46833e-07	0.58078	2.38711	0.104796	1	yes	no
F49F1.12	F49F1.12	-1.94035	0.167229	0.0013294	0.0238651	3.10922	0.167229	2.87001e-08	1.42762e-06	1.03068	0.167229	0.112319	1	yes	no
F52F12.5	F52F12.5	-1.24775	3.38188	2.24773e-06	8.70295e-05	1.14933	3.38188	1.25474e-05	0.000361023	0.0527449	3.38188	0.845097	1	yes	no
F52F12.8	F52F12.8	-1.43456	1.91932	7.89624e-05	0.00207935	1.80316	1.91932	4.7877e-07	1.87956e-05	0.803915	1.91932	0.0301028	1	yes	no
F53B2.5	F53B2.5	-1.13946	2.46613	0.000381939	0.00827613	1.62251	2.46613	2.92573e-07	1.21025e-05	0.131096	2.46613	0.691885	1	yes	no
F53B6.4	F53B6.4	-1.22647	5.89155	9.69484e-16	1.35195e-13	1.28012	5.89155	4.766e-17	6.83492e-15	0.248685	5.89155	0.104142	1	yes	no
F53B6.7	F53B6.7	-1.35973	3.32094	4.3852e-07	1.95831e-05	1.42612	3.32094	1.04845e-07	4.62304e-06	0.327831	3.32094	0.231514	1	yes	no
F53C3.1	F53C3.1	-1.59823	1.87877	1.27915e-05	0.000416855	1.74131	1.87877	1.60344e-06	5.61156e-05	0.63298	1.87877	0.0949741	1	yes	no
F53F4.18	F53F4.18	-1.38073	1.3602	0.000511067	0.0106235	1.66694	1.3602	2.04233e-05	0.000560328	0.234666	1.3602	0.575135	1	yes	no
F53G12.6	spe-8	-1.20815	2.371	0.000187266	0.0044456	1.38848	2.371	1.51436e-05	0.000426809	0.313417	2.371	0.344455	1	yes	no
F53G12.8	F53G12.8	-1.07898	2.99205	0.000155932	0.00379895	1.23178	2.99205	1.41383e-05	0.000400461	0.376004	2.99205	0.193045	1	yes	no
F54A3.4	cbs-2	-1.62495	2.06452	3.54354e-06	0.00013129	2.29659	2.06452	2.92547e-11	2.4506e-09	-0.18345	2.06452	0.630582	1	yes	no
F54C1.8	F54C1.8	-1.09924	2.21372	0.000824515	0.0159084	0.985466	2.21372	0.00264579	0.0431887	0.281775	2.21372	0.402003	1	yes	no
F54C1.9	sst-20	-1.38878	2.14539	3.58672e-05	0.00104122	1.67136	2.14539	4.98581e-07	1.9506e-05	-0.281686	2.14539	0.433172	1	yes	no
F54C8.1	F54C8.1	-1.27875	3.07589	6.18078e-06	0.00021482	1.61047	3.07589	1.00369e-08	5.47107e-07	0.267024	3.07589	0.355738	1	yes	no
F54C9.14	F54C9.14	-1.61733	1.98951	4.45292e-06	0.000160154	1.69611	1.98951	1.30197e-06	4.67158e-05	0.471299	1.98951	0.198649	1	yes	no
F54D1.1	F54D1.1	-1.32849	2.9004	5.42859e-06	0.000191161	1.28314	2.9004	1.05324e-05	0.000306539	0.202016	2.9004	0.500566	1	yes	no
F54D11.1	pmt-2	-1.17327	8.60094	9.48042e-18	1.55592e-15	1.17196	8.60094	1.00454e-17	1.53246e-15	0.293851	8.60094	0.0300125	1	yes	no
F54D12.1	F54D12.1	-1.70011	2.75088	2.27375e-08	1.2937e-06	0.253157	2.75088	0.422078	1	0.352932	2.75088	0.259719	1	no	no
F54D5.12	F54D5.12	-1.14939	6.6989	8.82369e-16	1.2419e-13	1.14196	6.6989	1.25617e-15	1.59516e-13	-0.0646897	6.6989	0.651293	1	yes	no
F54F12.1	F54F12.1	-1.45504	1.90422	2.52765e-05	0.00075948	1.57551	1.90422	4.39406e-06	0.000138721	-0.645494	1.90422	0.0901404	1	yes	no
F54H12.7	F54H12.7	-1.65402	3.06508	6.36146e-09	3.97797e-07	1.45176	3.06508	3.3073e-07	1.35575e-05	0.373484	3.06508	0.200703	1	yes	no
F54H12.8	F54H12.8	-1.58533	1.45545	7.27731e-05	0.00194151	2.06869	1.45545	1.19183e-07	5.20981e-06	0.151588	1.45545	0.723871	1	yes	no
F54H5.2	F54H5.2	-1.22664	1.19673	0.00200302	0.0338762	1.02053	1.19673	0.0102147	0.137023	0.117952	1.19673	0.777768	1	no	no
F54H5.5	F54H5.5	-1.02865	2.26313	0.00186007	0.031754	1.27695	2.26313	9.34283e-05	0.00219842	0.186349	2.26313	0.58319	1	yes	no
F55A12.4	dhs-2	-1.0146	3.81833	2.52076e-05	0.000758415	0.754891	3.81833	0.00173729	0.0300299	0.0244856	3.81833	0.920401	1	yes	no
F55C5.1	ssp-35	-1.44387	4.37133	1.39508e-11	1.30229e-09	1.6444	4.37133	1.25079e-14	1.42869e-12	0.399637	4.37133	0.0641386	1	yes	no
F55C5.2	F55C5.2	-2.54088	1.24786	1.26724e-08	7.5307e-07	2.99872	1.24786	7.10122e-12	6.32998e-10	1.15724	1.24786	0.0159281	0.644881	yes	no
F55D12.6	F55D12.6	-1.51026	3.14417	7.45163e-08	3.83741e-06	1.77683	3.14417	2.05395e-10	1.48923e-08	0.522123	3.14417	0.0675009	1	yes	no
F55E10.6	F55E10.6	-1.50269	4.20716	1.88944e-11	1.72829e-09	1.54154	4.20716	5.16554e-12	4.6779e-10	0.584087	4.20716	0.00966696	0.445258	yes	no
F55F8.7	F55F8.7	-1.34087	2.52587	2.42257e-05	0.000730805	1.51206	2.52587	1.63513e-06	5.70926e-05	0.504602	2.52587	0.11858	1	yes	no
F55G11.2	F55G11.2	-1.04527	2.28326	0.00164837	0.0287223	1.77213	2.28326	4.94796e-08	2.35538e-06	-0.245106	2.28326	0.482926	1	yes	no
F55H12.1	snf-2	-1.28339	2.22706	9.75144e-05	0.00250698	1.39172	2.22706	2.07011e-05	0.000566924	-0.219631	2.22706	0.527798	1	yes	no
F55H12.2	F55H12.2	-1.86161	3.55622	1.42004e-12	1.45725e-10	1.74756	3.55622	2.70252e-11	2.27939e-09	0.627865	3.55622	0.0185852	0.720292	yes	no
F55H12.5	F55H12.5	-1.56831	3.66428	6.43203e-10	4.70107e-08	1.57174	3.66428	5.3165e-10	3.59128e-08	0.330066	3.66428	0.200802	1	yes	no
F55H12.6	ztf-26	-1.47634	2.81708	6.27437e-07	2.71398e-05	1.17487	2.81708	7.57358e-05	0.00181978	0.172177	2.81708	0.572816	1	yes	no
F56A11.6	F56A11.6	-1.39561	3.82648	8.37869e-09	5.1683e-07	1.60994	3.82648	2.69144e-11	2.27426e-09	0.0760605	3.82648	0.758654	1	yes	no
F56A4.3	F56A4.3	-6.96247	4.9068	1.61227e-153	4.3115e-150	-0.731378	4.9068	0.0841198	0.697205	-2.86016	4.9068	7.0826e-07	0.000109891	no	no
F56A4.9	irld-35	-6.37645	3.00497	2.13353e-60	1.59004e-57	-5.89656	3.00497	1.80715e-05	0.000500639	-1.80248	3.00497	0.017919	0.702861	no	no
F56B3.6	F56B3.6	-1.39542	3.76299	1.4528e-08	8.55514e-07	1.45098	3.76299	3.40477e-09	2.02863e-07	0.281608	3.76299	0.259432	1	yes	no
F56B3.7	ugt-52	-1.17234	3.60094	8.60271e-06	0.000291422	1.53665	3.60094	4.32772e-09	2.52882e-07	0.685113	3.60094	0.00982418	0.450219	yes	no
F56D12.10	F56D12.10	-4.34068	2.42478	1.17459e-24	2.98313e-22	3.33369	2.42478	3.16774e-14	3.46175e-12	3.46117	2.42478	2.08404e-15	8.53537e-13	yes	yes
F56F3.4	F56F3.4	-1.2762	3.09917	4.80413e-06	0.000171435	1.41226	3.09917	3.70396e-07	1.5021e-05	0.126379	3.09917	0.658664	1	yes	no
F56F4.3	F56F4.3	-1.45987	1.73565	8.51852e-05	0.0022282	1.73363	1.73565	2.33324e-06	7.84553e-05	0.435372	1.73565	0.260877	1	yes	no
F56H1.3	F56H1.3	-2.11149	0.825613	1.10694e-05	0.000367051	2.70591	0.825613	5.99605e-09	3.39038e-07	0.341011	0.825613	0.531499	1	yes	no
F56H11.3	elo-7	-1.80619	1.00855	3.55371e-05	0.00103362	2.22642	1.00855	1.83431e-07	7.83735e-06	-0.124801	1.00855	0.800311	1	yes	no
F57A8.6	F57A8.6	-1.2	1.32752	0.00203053	0.0342905	0.818978	1.32752	0.0368507	0.383796	-0.0896704	1.32752	0.828556	1	no	no
F57B9.8	F57B9.8	-1.22519	1.81635	0.000640726	0.0128977	1.58933	1.81635	7.04185e-06	0.00021442	0.074379	1.81635	0.843252	1	yes	no
F57F4.1	F57F4.1	-1.29025	3.25981	1.94284e-06	7.6603e-05	1.44114	3.25981	9.45691e-08	4.2315e-06	0.0219901	3.25981	0.937186	1	yes	no
F57H12.5	F57H12.5	-1.46299	2.22745	1.01769e-05	0.000339188	1.2894	2.22745	9.80369e-05	0.00228909	0.436718	2.22745	0.199531	1	yes	no
F58A6.5	F58A6.5	-1.49663	2.43434	3.64547e-06	0.000134192	1.74388	2.43434	5.34087e-08	2.5213e-06	0.327163	2.43434	0.326957	1	yes	no
F58A6.8	msp-45	-1.44248	6.2863	3.42351e-22	7.78182e-20	1.63923	6.2863	4.18894e-28	1.22073e-25	0.388537	6.2863	0.00886906	0.414385	yes	no
F58A6.9	F58A6.9	-1.71981	4.6607	1.17199e-17	1.88267e-15	1.90855	4.6607	2.08774e-21	4.19958e-19	0.164603	4.6607	0.420672	1	yes	no
F58B4.7	F58B4.7	-2.2285	0.271843	4.88055e-05	0.00137044	2.205	0.271843	5.46859e-05	0.00136523	0.556769	0.271843	0.369738	1	yes	no
F58B6.1	F58B6.1	-1.167	2.4159	0.000261646	0.00596357	0.690019	2.4159	0.032405	0.347772	0.766499	2.4159	0.0169472	0.674639	no	no
F58D2.2	F58D2.2	-1.21489	4.06145	9.78776e-08	4.94402e-06	1.48961	4.06145	5.44228e-11	4.31031e-09	0.0636762	4.06145	0.783453	1	yes	no
F58D5.7	F58D5.7	-1.1674	3.20295	2.04534e-05	0.0006334	1.23917	3.20295	5.4765e-06	0.000170176	0.280782	3.20295	0.313016	1	yes	no
F58E6.1	sta-2	-1.28504	1.29629	0.000972652	0.0183561	1.28966	1.29629	0.000960081	0.0178585	0.0505275	1.29629	0.902888	1	yes	no
F58E6.5	F58E6.5	-1.27488	4.469	7.34902e-10	5.32845e-08	1.5477	4.469	6.788e-14	7.29525e-12	0.142947	4.469	0.495641	1	yes	no
F58F12.2	F58F12.2	-1.97963	0.896491	9.36464e-06	0.000314886	1.79245	0.896491	6.24932e-05	0.00153485	0.522842	0.896491	0.280581	1	yes	no
F58F12.3	F58F12.3	-1.28411	2.08854	0.000199401	0.00470663	1.78206	2.08854	1.56117e-07	6.74002e-06	0.297324	2.08854	0.405933	1	yes	no
F58G1.3	F58G1.3	-1.41347	3.64857	2.07376e-08	1.18436e-06	1.4807	3.64857	3.86491e-09	2.26713e-07	0.0630928	3.64857	0.806673	1	yes	no
F58H1.6	F58H1.6	-1.33531	2.37299	3.69101e-05	0.00106944	1.51963	2.37299	2.24025e-06	7.544e-05	0.0672295	2.37299	0.841827	1	yes	no
F59A1.10	dgat-2	-1.64355	3.46636	5.32691e-09	3.36343e-07	2.2065	3.46636	2.265e-15	2.81337e-13	1.82936	3.46636	5.75602e-11	1.57635e-08	yes	yes
F59A1.15	F59A1.15	-1.88458	1.74853	3.57917e-07	1.61903e-05	1.9555	1.74853	1.09094e-07	4.79643e-06	-0.108128	1.74853	0.79041	1	yes	no
F59A3.13	F59A3.13	-1.65923	0.185894	0.00156144	0.0274283	1.3128	0.185894	0.0136874	0.174689	0.341448	0.185894	0.551961	1	no	no
F59A3.8	F59A3.8	-1.4261	2.24494	1.64923e-05	0.000525407	1.43447	2.24494	1.34435e-05	0.000383169	0.250635	2.24494	0.46524	1	yes	no
F59A6.4	F59A6.4	-1.27317	2.98875	9.54314e-06	0.000319706	1.59314	2.98875	2.44062e-08	1.23144e-06	0.324806	2.98875	0.268091	1	yes	no
F59A6.8	F59A6.8	-1.80276	0.880546	3.69333e-05	0.00106944	2.3003	0.880546	7.0444e-08	3.22179e-06	-1.03074	0.880546	0.0561649	1	yes	no
F59B2.15	F59B2.15	-2.34871	0.269747	6.3824e-05	0.00173224	2.71641	0.269747	1.91253e-06	6.56192e-05	1.71468	0.269747	0.00501412	0.267988	yes	no
F59C6.16	F59C6.16	-1.72196	3.96507	4.22336e-13	4.5823e-11	1.81932	3.96507	1.72942e-14	1.93648e-12	0.131821	3.96507	0.58799	1	yes	no
F59C6.2	dhhc-12	-1.69651	0.511581	0.000499734	0.0104117	2.02054	0.511581	2.29456e-05	0.000620909	0.0943668	0.511581	0.862039	1	yes	no
F59C6.3	F59C6.3	-1.55322	1.55652	5.82113e-05	0.001599	1.80814	1.55652	2.30343e-06	7.75103e-05	0.739781	1.55652	0.0637828	1	yes	no
F59C6.6	nlp-4	-1.0182	1.98889	0.00286777	0.0458731	1.11687	1.98889	0.00095347	0.0177574	0.0163563	1.98889	0.963025	1	yes	no
F59D6.3	asp-8	-4.03122	3.1951	7.64734e-32	2.71606e-29	3.07473	3.1951	1.50326e-18	2.49415e-16	2.55189	3.1951	8.42127e-13	2.7742e-10	yes	yes
F59D8.1	vit-3	-1.48427	13.2061	4.87019e-27	1.42841e-24	1.32171	13.2061	6.03314e-22	1.24105e-19	0.711541	13.2061	1.56344e-07	2.69225e-05	yes	yes
F59D8.2	vit-4	-1.31955	13.2385	7.01156e-22	1.55489e-19	1.17918	13.2385	6.7509e-18	1.05829e-15	0.706386	13.2385	1.91629e-07	3.25061e-05	yes	yes
F59E11.11	nhr-143	-1.23864	2.36529	0.000124783	0.00311008	0.845843	2.36529	0.00932209	0.12715	0.23497	2.36529	0.479454	1	no	no
F59E11.12	nhr-144	-1.37301	2.11088	5.71646e-05	0.00157215	0.75523	2.11088	0.0293439	0.320983	0.341055	2.11088	0.333629	1	no	no
F59F3.5	ver-4	-1.81629	1.5127	1.24215e-05	0.000406546	1.87039	1.5127	5.85265e-06	0.000181121	1.344	1.5127	0.00147269	0.0983111	yes	no
F59F5.2	glo-3	-1.03699	3.11815	0.000185922	0.00441831	0.903533	3.11815	0.00113608	0.0206464	0.10506	3.11815	0.711053	1	yes	no
F59H6.2	F59H6.2	-1.45581	0.616268	0.00176226	0.030315	0.685708	0.616268	0.157671	1	0.13696	0.616268	0.786528	1	no	no
H04J21.1	H04J21.1	-1.4297	0.566758	0.00160017	0.0280329	1.33189	0.566758	0.00317281	0.0504862	-0.358601	0.566758	0.47846	1	no	no
H04M03.1	pck-3	-1.35295	3.44906	2.52069e-07	1.17773e-05	1.51682	3.44906	6.52232e-09	3.66516e-07	0.270147	3.44906	0.312196	1	yes	no
H05L14.1	H05L14.1	-1.27351	4.14807	1.06758e-08	6.41125e-07	1.389	4.14807	4.05125e-10	2.79051e-08	0.0412728	4.14807	0.855503	1	yes	no
H06H21.9	mpz-4	-1.20624	2.41983	0.000169598	0.00407726	1.33981	2.41983	2.61995e-05	0.000698975	0.287371	2.41983	0.382489	1	yes	no
H06I04.5	H06I04.5	-1.95705	1.66885	2.19345e-07	1.04197e-05	2.13669	1.66885	1.13627e-08	6.15684e-07	-0.325666	1.66885	0.443964	1	yes	no
H08M01.1	H08M01.1	-1.14993	2.30449	0.000402706	0.00866419	1.44507	2.30449	7.05761e-06	0.000214756	-0.355523	2.30449	0.302538	1	yes	no
H11L12.1	H11L12.1	-1.41521	3.38059	1.16541e-07	5.84129e-06	0.959171	3.38059	0.000349764	0.00727053	0.478009	3.38059	0.0776908	1	yes	no
H12C20.3	nhr-68	-1.64669	4.48195	8.37949e-15	1.07307e-12	1.76658	4.48195	6.77062e-17	9.61872e-15	0.336466	4.48195	0.119226	1	yes	no
H12D21.10	H12D21.10	-1.49753	2.25416	6.09714e-06	0.000212237	1.04168	2.25416	0.00179872	0.030974	0.447398	2.25416	0.189595	1	yes	no
H17B01.3	lips-14	-2.07889	2.46575	5.36507e-10	3.97881e-08	1.98619	2.46575	2.66945e-09	1.61592e-07	1.29314	2.46575	0.000137759	0.0129127	yes	yes
H20J04.1	H20J04.1	-1.17122	1.55386	0.00184611	0.0315749	1.44124	1.55386	0.000102512	0.00238622	-0.231755	1.55386	0.565177	1	yes	no
H24K24.5	fmo-5	-1.02991	3.46844	7.0612e-05	0.00189163	0.545474	3.46844	0.0365118	0.381052	0.125276	3.46844	0.634569	1	no	no
H27M09.5	H27M09.5	-1.35943	2.28168	3.49452e-05	0.00101836	1.41646	2.28168	1.48174e-05	0.000417875	-0.0199042	2.28168	0.954025	1	yes	no
H28G03.5	H28G03.5	-2.64852	3.30307	1.01778e-21	2.23524e-19	-0.244511	3.30307	0.405068	1	-0.467876	3.30307	0.115317	1	no	no
H32C10.1	H32C10.1	-1.45573	2.81369	1.22258e-06	5.00267e-05	1.66189	2.81369	2.55321e-08	1.28256e-06	0.505959	2.81369	0.0980793	1	yes	no
H32C10.3	dhhc-13	-1.26969	0.94691	0.00277881	0.0446388	1.44882	0.94691	0.000513639	0.0102413	-0.743834	0.94691	0.125174	1	yes	no
H34I24.1	H34I24.1	-1.34149	2.35335	4.31599e-05	0.00122938	1.74668	2.35335	7.54108e-08	3.44202e-06	0.387196	2.35335	0.250833	1	yes	no
H38K22.7	H38K22.7	-2.02309	0.195317	0.000220097	0.00512856	2.06549	0.195317	0.000139798	0.00317133	1.27024	0.195317	0.026176	0.913967	yes	no
H41C03.1	H41C03.1	-1.0598	2.64781	0.000545674	0.0112147	0.707943	2.64781	0.0216629	0.251935	0.685777	2.64781	0.0258257	0.907311	no	no
K01A11.4	spe-41	-1.19754	3.59371	2.19393e-06	8.55388e-05	1.12482	3.59371	8.26751e-06	0.000247432	0.0502535	3.59371	0.845566	1	yes	no
K01A2.4	K01A2.4	-1.40139	1.08854	0.00267691	0.043385	1.12584	1.08854	0.0163895	0.201852	1.73797	1.08854	0.00011922	0.0115562	no	yes
K01C8.1	K01C8.1	-2.25463	5.00838	3.29073e-32	1.1873e-29	2.39454	5.00838	4.16222e-36	1.78508e-33	0.247979	5.00838	0.200493	1	yes	no
K01D12.15	K01D12.15	-1.2682	3.19383	3.86739e-06	0.000141672	1.47636	3.19383	6.62067e-08	3.05566e-06	0.122781	3.19383	0.662641	1	yes	no
K01D12.7	K01D12.7	-1.47549	3.60021	1.12716e-08	6.72462e-07	1.7154	3.60021	2.6482e-11	2.2419e-09	0.540241	3.60021	0.0388304	1	yes	no
K01H12.2	ant-1.3	-2.00663	3.48881	1.28741e-13	1.47796e-11	2.62103	3.48881	3.5476e-22	7.36426e-20	-0.00629367	3.48881	0.982406	1	yes	no
K01H12.4	K01H12.4	-1.24612	4.03467	4.94742e-08	2.6523e-06	1.18635	4.03467	1.94477e-07	8.28594e-06	0.119088	4.03467	0.607494	1	yes	no
K02D7.3	col-101	-1.91218	9.48392	6.92603e-43	3.79355e-40	1.57112	9.48392	4.58911e-30	1.45892e-27	0.894396	9.48392	4.79264e-11	1.33668e-08	yes	yes
K02E11.1	ent-3	-1.38882	3.52891	7.86383e-08	4.02587e-06	1.56954	3.52891	1.11989e-09	7.15047e-08	0.278992	3.52891	0.289059	1	yes	no
K02E11.7	K02E11.7	-1.33101	1.51673	0.000873753	0.0167316	1.24386	1.51673	0.00180981	0.0311415	1.19426	1.51673	0.00274425	0.16506	yes	no
K02E7.6	K02E7.6	-4.30043	4.37409	3.33602e-64	2.52764e-61	4.18425	4.37409	3.30497e-61	2.88937e-58	2.21862	4.37409	8.92801e-18	4.61223e-15	yes	yes
K02F6.2	K02F6.2	-1.09519	2.38469	0.000643869	0.0129346	1.12245	2.38469	0.000432383	0.00876742	0.206295	2.38469	0.530714	1	yes	no
K02F6.3	K02F6.3	-1.38082	2.73964	5.63352e-06	0.000197765	1.58064	2.73964	1.74223e-07	7.47202e-06	0.285486	2.73964	0.361805	1	yes	no
K03H1.1	gln-2	-1.4507	5.00523	3.41343e-15	4.48491e-13	1.55842	5.00523	2.42287e-17	3.5646e-15	0.304306	5.00523	0.100656	1	yes	no
K03H1.12	K03H1.12	-1.19008	1.72935	0.00120895	0.0220369	1.64796	1.72935	4.82875e-06	0.000151393	0.233283	1.72935	0.540611	1	yes	no
K03H1.9	K03H1.9	-2.08341	0.770417	1.21503e-05	0.000398818	2.24563	0.770417	1.79995e-06	6.21316e-05	1.12114	0.770417	0.0254411	0.897997	yes	no
K04C2.8	K04C2.8	-2.73416	0.275064	2.30131e-06	8.87363e-05	2.78244	0.275064	1.2572e-06	4.52521e-05	1.18223	0.275064	0.0684612	1	yes	no
K04G2.4	K04G2.4	-1.31479	3.92767	2.72693e-08	1.52443e-06	1.39504	3.92767	3.33262e-09	1.98825e-07	0.300998	3.92767	0.20906	1	yes	no
K04H4.5	K04H4.5	-1.2563	4.47088	1.32315e-09	9.18349e-08	1.47592	4.47088	9.04476e-13	8.73001e-11	0.199318	4.47088	0.341718	1	yes	no
K05F1.2	msp-142	-1.65949	5.163	2.51373e-20	5.03422e-18	1.68342	5.163	6.07315e-21	1.17988e-18	0.340134	5.163	0.0597091	1	yes	no
K05F1.3	acdh-8	-1.64683	5.0308	6.04877e-19	1.0912e-16	1.8196	5.0308	8.51625e-23	1.87032e-20	0.4165	5.0308	0.0254666	0.898168	yes	no
K05F1.7	msp-63	-1.55765	1.68216	3.20552e-05	0.000941385	1.77403	1.68216	1.69632e-06	5.88493e-05	0.518763	1.68216	0.18241	1	yes	no
K05F1.9	K05F1.9	-1.02888	4.03842	6.31049e-06	0.000219161	1.00183	4.03842	1.03249e-05	0.000301077	0.28199	4.03842	0.219405	1	yes	no
K05F6.11	poml-4	-5.08262	0.230871	7.12066e-12	6.84382e-10	4.69488	0.230871	7.12208e-10	4.68563e-08	4.18481	0.230871	1.35581e-07	2.35254e-05	yes	yes
K06A1.2	K06A1.2	-1.66062	0.95795	0.000119368	0.00299317	1.94772	0.95795	4.44919e-06	0.000140364	0.229402	0.95795	0.62354	1	yes	no
K06A5.2	K06A5.2	-1.02034	5.966	1.36733e-11	1.27901e-09	1.1624	5.966	1.25525e-14	1.4302e-12	0.142808	5.966	0.345385	1	yes	no
K06A5.3	K06A5.3	-1.25151	1.53782	0.00107392	0.0199352	1.39747	1.53782	0.000221376	0.00479924	0.16469	1.53782	0.681627	1	yes	no
K06B4.15	K06B4.15	-1.21823	1.32613	0.0017016	0.0294578	0.941244	1.32613	0.0160208	0.198345	-0.00132139	1.32613	0.997379	1	no	no
K06H7.8	K06H7.8	-1.11465	1.90574	0.00129606	0.0233163	1.08588	1.90574	0.00166361	0.0290212	0.333854	1.90574	0.347088	1	yes	no
K07A1.4	K07A1.4	-1.02285	2.47568	0.00113506	0.0209419	1.36665	2.47568	1.13937e-05	0.000329287	-0.098717	2.47568	0.761676	1	yes	no
K07A1.5	K07A1.5	-1.24147	3.84342	2.45856e-07	1.15225e-05	1.48806	3.84342	5.43921e-10	3.66872e-08	0.10338	3.84342	0.672831	1	yes	no
K07A3.3	K07A3.3	-1.04544	3.17112	0.000134599	0.00332916	1.26095	3.17112	3.62751e-06	0.000117124	0.167378	3.17112	0.54793	1	yes	no
K07C10.1	ptr-13	-1.16644	4.08672	1.96142e-07	9.4558e-06	1.09071	4.08672	1.11691e-06	4.07184e-05	-0.222709	4.08672	0.332942	1	yes	no
K07C6.5	cyp-35A5	-2.53861	1.40513	1.77645e-09	1.20356e-07	2.55423	1.40513	1.26659e-09	8.03077e-08	0.0351536	1.40513	0.943175	1	yes	no
K07E8.3	sdz-24	-1.09546	3.71724	1.29984e-05	0.00042269	1.27905	3.71724	3.01258e-07	1.24166e-05	0.840994	3.71724	0.000802216	0.0581651	yes	no
K07F5.1	msp-81	-1.25424	6.60084	3.26576e-18	5.51914e-16	1.35144	6.60084	6.92708e-21	1.34005e-18	0.274291	6.60084	0.0561508	1	yes	no
K07F5.11	ssq-1	-1.16924	7.32781	4.20623e-17	6.52627e-15	1.26639	7.32781	9.11485e-20	1.64433e-17	0.267576	7.32781	0.0528632	1	yes	no
K07F5.2	msp-10	-1.40501	6.59243	3.48325e-22	7.87821e-20	1.483	6.59243	1.56267e-24	3.90333e-22	0.543959	6.59243	0.000160995	0.014754	yes	yes
K07F5.3	msp-56	-1.32404	5.79393	1.60251e-17	2.54726e-15	1.41039	5.79393	1.05555e-19	1.8967e-17	0.39491	5.79393	0.0111394	0.495509	yes	no
K07F5.4	kin-24	-1.70582	1.47099	2.43421e-05	0.000733832	2.20695	1.47099	2.52773e-08	1.27257e-06	0.43397	1.47099	0.313501	1	yes	no
K07F5.5	nspd-2	-1.24315	5.97914	2.9023e-16	4.32595e-14	1.46351	5.97914	6.30411e-22	1.29095e-19	0.24937	5.97914	0.101552	1	yes	no
K07F5.6	K07F5.6	-1.62332	1.89957	5.14148e-06	0.00018233	1.69802	1.89957	1.6297e-06	5.69468e-05	0.20851	1.89957	0.579739	1	yes	no
K07F5.9	ssp-10	-1.34447	5.75824	1.00519e-17	1.63789e-15	1.52309	5.75824	2.6253e-22	5.47472e-20	0.46813	5.75824	0.00284058	0.169517	yes	no
K07H8.5	K07H8.5	-1.66083	0.736746	0.000153759	0.00375405	1.59289	0.736746	0.000256707	0.00548152	-0.452922	0.736746	0.364594	1	yes	no
K08A2.2	K08A2.2	-1.49826	2.49365	2.75135e-06	0.000104407	1.52974	2.49365	1.50761e-06	5.32122e-05	0.426398	2.49365	0.193409	1	yes	no
K08C9.1	K08C9.1	-1.46287	3.2116	8.49523e-08	4.31993e-06	1.31478	3.2116	1.3846e-06	4.93102e-05	0.307465	3.2116	0.269165	1	yes	no
K08C9.2	K08C9.2	-1.2062	4.67139	1.0352e-09	7.33042e-08	1.50215	4.67139	2.56157e-14	2.81284e-12	0.440026	4.67139	0.0267046	0.925307	yes	no
K08D10.7	scrm-8	-1.56618	2.04052	8.14435e-06	0.000277757	1.52516	2.04052	1.26647e-05	0.000363708	0.724563	2.04052	0.0437936	1	yes	no
K08D10.8	scrm-5	-1.38032	2.97762	1.81413e-06	7.20281e-05	1.50864	2.97762	1.53823e-07	6.6473e-06	0.486011	2.97762	0.0977172	1	yes	no
K08D10.9	K08D10.9	-1.52025	0.545663	0.00262029	0.0425737	1.52843	0.545663	0.00224383	0.0375024	1.61929	0.545663	0.00110538	0.0761392	yes	no
K08E7.9	pgp-1	-1.66413	0.621079	0.000329467	0.00729207	1.06304	0.621079	0.0254717	0.286626	0.3132	0.621079	0.531864	1	no	no
K08F4.5	K08F4.5	-1.6403	2.82211	5.98194e-08	3.14024e-06	2.02557	2.82211	1.68011e-11	1.45209e-09	0.234674	2.82211	0.455359	1	yes	no
K08F4.7	gst-4	-2.12555	4.41301	1.18283e-22	2.74351e-20	1.95268	4.41301	1.7991e-19	3.2074e-17	0.369335	4.41301	0.0949119	1	yes	no
K08F4.8	msp-38	-1.67158	5.6867	1.91226e-25	5.17461e-23	1.59753	5.6867	1.73965e-23	4.03502e-21	0.404289	5.6867	0.0116863	0.509369	yes	no
K08F8.5	K08F8.5	-1.38348	1.62181	0.000224329	0.00522183	1.45056	1.62181	9.83007e-05	0.00229407	0.43031	1.62181	0.268502	1	yes	no
K09A11.2	cyp-14A1	-1.43736	2.03348	5.56244e-05	0.00153443	1.59975	2.03348	5.79486e-06	0.000179578	1.26128	2.03348	0.000396761	0.0319807	yes	yes
K09A11.3	cyp-14A2	-1.58903	2.51049	9.62382e-07	4.00649e-05	2.16863	2.51049	1.54033e-11	1.33891e-09	-0.226669	2.51049	0.515392	1	yes	no
K09B11.5	K09B11.5	-1.10782	2.25665	0.000855368	0.0164283	1.58155	2.25665	1.35282e-06	4.83877e-05	0.283918	2.25665	0.404657	1	yes	no
K09C4.1	K09C4.1	-1.71917	1.57716	2.22353e-05	0.000679784	2.1196	1.57716	9.82168e-08	4.36465e-06	0.704564	1.57716	0.0979529	1	yes	no
K09C6.1	K09C6.1	-1.7138	0.956807	0.000114191	0.00287286	1.81429	0.956807	3.74509e-05	0.000965168	0.226075	0.956807	0.642377	1	yes	no
K09C6.7	K09C6.7	-1.26463	4.09934	2.03236e-08	1.16218e-06	1.36969	4.09934	1.11749e-09	7.14521e-08	0.171418	4.09934	0.453439	1	yes	no
K09C6.8	K09C6.8	-2.81962	0.536982	3.54994e-07	1.60741e-05	3.32035	0.536982	6.62773e-10	4.37941e-08	1.09349	0.536982	0.0837294	1	yes	no
K09C6.9	K09C6.9	-1.86258	1.76403	1.31841e-06	5.36104e-05	1.25963	1.76403	0.00128034	0.0229246	0.5155	1.76403	0.205863	1	yes	no
K09D9.2	cyp-35A3	-2.28891	0.518283	1.01541e-06	4.21567e-05	1.20246	0.518283	0.0145156	0.182796	-0.688499	0.518283	0.234038	1	no	no
K09E4.1	K09E4.1	-1.40027	4.30297	8.35086e-11	6.9915e-09	1.40975	4.30297	5.52116e-11	4.36518e-09	0.435583	4.30297	0.0448618	1	yes	no
K09F5.2	vit-1	-1.62205	12.9813	9.5057e-32	3.34991e-29	1.49383	12.9813	2.29836e-27	6.37107e-25	0.897155	12.9813	4.24312e-11	1.19072e-08	yes	yes
K09F6.3	K09F6.3	-1.35356	4.17338	1.28259e-09	8.94013e-08	1.64781	4.17338	1.31336e-13	1.36942e-11	0.14716	4.17338	0.516428	1	yes	no
K09G1.2	K09G1.2	-1.26136	1.95027	0.000321877	0.00716694	1.71301	1.95027	6.85635e-07	2.59964e-05	-0.0348188	1.95027	0.924933	1	yes	no
K09H11.7	K09H11.7	-1.34446	3.07366	2.15977e-06	8.43518e-05	1.36038	3.07366	1.49833e-06	5.30083e-05	-0.670947	3.07366	0.0278734	0.953465	yes	no
K09H9.5	K09H9.5	-1.2539	1.29165	0.00216358	0.0361214	1.16976	1.29165	0.00405856	0.0624387	1.20329	1.29165	0.00299465	0.176347	no	no
K10C2.8	K10C2.8	-1.18362	3.56297	3.21737e-06	0.000120284	1.21697	3.56297	1.55014e-06	5.45439e-05	0.161055	3.56297	0.53259	1	yes	no
K10C9.7	K10C9.7	-1.4182	1.9003	6.03758e-05	0.00164849	1.52529	1.9003	1.34648e-05	0.000383535	-0.0651755	1.9003	0.862326	1	yes	no
K10D11.1	dod-17	-2.19914	2.86612	2.53159e-12	2.52387e-10	2.25619	2.86612	5.02233e-13	5.06254e-11	-0.485441	2.86612	0.170586	1	yes	no
K10H10.7	K10H10.7	-1.99529	0.787078	9.28041e-06	0.000312285	1.45647	0.787078	0.00151773	0.0266709	0.130777	0.787078	0.795257	1	yes	no
K11C4.1	K11C4.1	-1.97706	2.87207	7.96941e-11	6.70921e-09	2.16918	2.87207	7.69643e-13	7.57332e-11	0.560857	2.87207	0.0738548	1	yes	no
K11C4.2	K11C4.2	-1.38424	1.07347	0.00103832	0.0194011	1.07347	1.07347	0.0117354	0.153969	0.247562	1.07347	0.58087	1	no	no
K11D12.4	cpt-4	-2.02889	3.43839	3.66122e-13	4.00102e-11	2.22465	3.43839	1.08358e-15	1.38372e-13	0.911864	3.43839	0.00133926	0.0903767	yes	no
K11G9.2	K11G9.2	-1.36285	2.51342	3.69897e-05	0.00106971	1.45344	2.51342	9.44277e-06	0.000278248	1.43748	2.51342	1.16487e-05	0.00141594	yes	yes
K11G9.3	K11G9.3	-2.05045	3.19501	2.8635e-12	2.83611e-10	1.83028	3.19501	4.53012e-10	3.10156e-08	1.14813	3.19501	0.000119883	0.0115711	yes	yes
K11H3.2	K11H3.2	-1.4112	1.60672	0.000210328	0.00493126	1.54327	1.60672	4.26127e-05	0.00108649	0.442543	1.60672	0.262501	1	yes	no
M01B2.1	kin-30	-1.99841	0.0930316	0.000377822	0.00821376	1.80043	0.0930316	0.00145517	0.0256707	0.79573	0.0930316	0.192607	1	yes	no
M02B1.4	M02B1.4	-1.33706	2.96835	3.59867e-06	0.000132899	1.46603	2.96835	3.34564e-07	1.37024e-05	0.309117	2.96835	0.294569	1	yes	no
M02D8.4	asns-2	-1.166	6.16277	1.14991e-14	1.46432e-12	1.82162	6.16277	3.95318e-33	1.41508e-30	0.1045	6.16277	0.492341	1	yes	no
M02G9.4	M02G9.4	-1.73734	0.234844	0.000862859	0.0165512	1.79696	0.234844	0.0004963	0.00993059	0.0860081	0.234844	0.88349	1	yes	no
M02H5.5	nhr-203	-1.37093	1.39178	0.000356184	0.00781867	1.00637	1.39178	0.00938351	0.127911	-2.10748	1.39178	2.74185e-05	0.00308533	no	no
M03B6.2	M03B6.2	-1.42617	5.75063	1.49449e-19	2.81912e-17	1.5694	5.75063	2.24333e-23	5.17685e-21	-0.0801693	5.75063	0.615537	1	yes	no
M05B5.1	M05B5.1	-1.12705	3.34386	1.99693e-05	0.000619677	1.15895	3.34386	1.08108e-05	0.000314038	0.0552028	3.34386	0.837943	1	yes	no
M05B5.3	M05B5.3	-1.40594	1.0899	0.000966163	0.0182555	2.21535	1.0899	7.68715e-08	3.49815e-06	-0.108146	1.0899	0.817495	1	yes	no
M05D6.1	M05D6.1	-1.63159	2.70856	1.49948e-07	7.36154e-06	1.80933	2.70856	4.76351e-09	2.74466e-07	0.236042	2.70856	0.465353	1	yes	no
M110.1	col-76	-1.3853	3.87613	1.07303e-08	6.43547e-07	0.98553	3.87613	4.88057e-05	0.00122583	0.835642	3.87613	0.00058804	0.0447038	yes	yes
M110.7	M110.7	-1.53221	2.23847	4.80431e-06	0.000171435	1.89366	2.23847	1.19911e-08	6.45884e-07	0.140465	2.23847	0.690492	1	yes	no
M117.4	M117.4	-1.6468	2.63645	1.71587e-07	8.35175e-06	1.8871	2.63645	1.69758e-09	1.06593e-07	0.207739	2.63645	0.526838	1	yes	no
M153.1	M153.1	-1.19412	2.85981	5.27124e-05	0.00146477	1.09088	2.85981	0.000218068	0.00473428	0.637146	2.85981	0.0324782	1	yes	no
M153.2	M153.2	-1.38361	3.33987	3.49855e-07	1.58889e-05	1.33064	3.33987	9.26974e-07	3.41501e-05	0.633236	3.33987	0.021329	0.794783	yes	no
M162.7	M162.7	-1.39484	3.12154	6.06772e-07	2.63714e-05	1.65573	3.12154	2.80205e-09	1.69037e-07	0.0191407	3.12154	0.947283	1	yes	no
M28.9	M28.9	-1.61199	4.65171	6.51635e-16	9.46453e-14	1.6722	4.65171	4.70625e-17	6.77059e-15	0.183971	4.65171	0.363149	1	yes	no
M7.7	M7.7	-1.7175	2.09102	6.47504e-07	2.79016e-05	1.74885	2.09102	3.53233e-07	1.43892e-05	0.526133	2.09102	0.141484	1	yes	no
M70.3	M70.3	-1.59008	4.68847	9.50777e-16	1.32995e-13	1.68776	4.68847	1.36557e-17	2.06246e-15	0.234664	4.68847	0.241479	1	yes	no
R01H2.2	R01H2.2	-1.98397	1.72436	2.17653e-07	1.03501e-05	2.12818	1.72436	2.01403e-08	1.03742e-06	0.522223	1.72436	0.199816	1	yes	no
R01H2.4	R01H2.4	-1.6447	0.149019	0.00176244	0.030315	1.54652	0.149019	0.00321644	0.0510019	-0.0239836	0.149019	0.968107	1	no	no
R02F2.8	R02F2.8	-1.09564	2.76439	0.000327427	0.00726446	1.31951	2.76439	1.28848e-05	0.000369366	0.874071	2.76439	0.00413652	0.231304	yes	no
R03D7.2	R03D7.2	-1.73441	3.92865	3.05198e-13	3.38405e-11	1.70194	3.92865	7.42173e-13	7.33477e-11	0.0603008	3.92865	0.804536	1	yes	no
R03D7.5	R03D7.5	-1.91431	0.561243	7.93398e-05	0.0020861	2.06169	0.561243	1.61497e-05	0.000452361	0.429232	0.561243	0.417963	1	yes	no
R03D7.8	R03D7.8	-1.51371	1.88455	3.90449e-05	0.00112343	2.18142	1.88455	1.50978e-09	9.51954e-08	0.544367	1.88455	0.155638	1	yes	no
R03E9.2	R03E9.2	-1.5711	1.30768	6.79234e-05	0.00182498	0.718302	1.30768	0.0771169	0.659111	-0.0942176	1.30768	0.825967	1	no	no
R03G5.5	R03G5.5	-1.87617	2.08988	2.13043e-07	1.01842e-05	1.99186	2.08988	3.0728e-08	1.52005e-06	0.907577	2.08988	0.015295	0.626421	yes	no
R03H10.6	R03H10.6	-4.37324	0.80646	3.33224e-16	4.95056e-14	2.12331	0.80646	0.000625825	0.0122263	1.33573	0.80646	0.0461172	1	yes	no
R04B5.5	R04B5.5	-1.28158	3.62818	5.1431e-07	2.27001e-05	1.12965	3.62818	9.38772e-06	0.000277127	0.626425	3.62818	0.0147636	0.61071	yes	no
R05F9.12	aagr-2	-1.02696	7.50455	1.3133e-13	1.5001e-11	0.989407	7.50455	9.15045e-13	8.81331e-11	0.744427	7.50455	7.17725e-08	1.29478e-05	yes	yes
R05F9.13	msp-31	-1.45309	7.10302	6.86498e-25	1.78337e-22	1.59953	7.10302	1.05548e-29	3.28652e-27	0.444331	7.10302	0.00147642	0.0984157	yes	no
R05F9.8	msp-33	-1.3224	6.77275	1.91837e-20	3.87605e-18	1.48908	6.77275	2.03275e-25	5.22096e-23	0.402305	6.77275	0.00457676	0.250378	yes	no
R05H5.2	cdc-25.4	-1.56488	1.02045	0.000202899	0.00478175	1.53691	1.02045	0.000243935	0.00523585	0.00918396	1.02045	0.984081	1	yes	no
R06B10.1	R06B10.1	-2.20532	2.07084	3.20827e-10	2.45164e-08	2.16316	2.07084	6.08378e-10	4.04349e-08	-0.300043	2.07084	0.445881	1	yes	no
R06B10.2	R06B10.2	-1.49905	1.03783	0.000429613	0.00914294	1.74051	1.03783	3.30825e-05	0.000861871	0.154941	1.03783	0.735851	1	yes	no
R07B7.4	R07B7.4	-1.46216	1.75573	5.17504e-05	0.00144156	1.44315	1.75573	5.9307e-05	0.0014661	-0.13958	1.75573	0.718625	1	yes	no
R07C3.1	clec-43	-3.90297	0.146677	1.38921e-06	5.62375e-05	4.47675	0.146677	4.66666e-09	2.69912e-07	3.29308	0.146677	0.00011493	0.0111642	yes	yes
R07C3.4	acs-15	-1.60481	2.93362	4.20444e-08	2.27275e-06	1.80691	2.93362	5.62712e-10	3.78424e-08	0.0214719	2.93362	0.943923	1	yes	no
R07E5.15	R07E5.15	-1.44006	4.16789	1.00928e-10	8.35753e-09	1.3557	4.16789	1.03688e-09	6.66728e-08	0.305547	4.16789	0.174672	1	yes	no
R07E5.4	R07E5.4	-1.57683	2.28215	3.11093e-06	0.000116496	1.81654	2.28215	5.70026e-08	2.67983e-06	0.732122	2.28215	0.0339995	1	yes	no
R07E5.6	R07E5.6	-1.0583	2.93172	0.000257646	0.00588586	1.37153	2.93172	1.78923e-06	6.18532e-05	0.309227	2.93172	0.292831	1	yes	no
R08A2.1	R08A2.1	-1.13151	2.8517	0.000109713	0.00276939	1.1846	2.8517	4.78776e-05	0.00120652	0.0965719	2.8517	0.747575	1	yes	no
R08A2.2	R08A2.2	-1.63048	2.04145	3.45878e-06	0.000128359	1.84645	2.04145	1.08488e-07	4.77442e-06	0.542802	2.04145	0.135663	1	yes	no
R08A2.3	ssp-33	-1.22527	2.65891	7.40169e-05	0.00197007	1.37911	2.65891	7.16057e-06	0.000216916	0.57334	2.65891	0.0670113	1	yes	no
R08B4.1	grd-1	-1.31158	0.908701	0.00193038	0.0327818	1.34268	0.908701	0.00137374	0.0243762	-0.175146	0.908701	0.703544	1	yes	no
R08C7.5	R08C7.5	-1.50793	2.484	2.20766e-06	8.59267e-05	1.70687	2.484	6.8887e-08	3.1665e-06	-0.060013	2.484	0.857616	1	yes	no
R08C7.6	clec-175	-1.61994	2.03195	2.46971e-06	9.45877e-05	1.63974	2.03195	1.71752e-06	5.95122e-05	-0.020597	2.03195	0.955225	1	yes	no
R08C7.8	R08C7.8	-1.75526	0.889582	0.000122905	0.00306831	2.26487	0.889582	3.50829e-07	1.43169e-05	0.770682	0.889582	0.109343	1	yes	no
R08F11.4	R08F11.4	-2.29323	3.09816	8.46769e-16	1.19922e-13	1.2155	3.09816	2.25275e-05	0.000612147	-0.380148	3.09816	0.213911	1	yes	no
R09A1.2	R09A1.2	-1.22066	3.08671	1.16663e-05	0.000383765	1.10287	3.08671	7.24337e-05	0.00174876	0.128648	3.08671	0.651663	1	yes	no
R09A1.3	R09A1.3	-2.52575	1.56902	8.24996e-10	5.93436e-08	1.83316	1.56902	1.37529e-05	0.000390764	1.74595	1.56902	3.49209e-05	0.00378071	yes	yes
R09B5.4	fpn-1.2	-4.32329	0.939478	1.7815e-12	1.80376e-10	3.87903	0.939478	7.29134e-10	4.79005e-08	1.81788	0.939478	0.0186675	0.72225	yes	no
R09E10.1	R09E10.1	-1.23963	2.36791	0.000131351	0.00325946	1.48462	2.36791	3.80837e-06	0.000121753	0.373868	2.36791	0.259336	1	yes	no
R09E10.2	R09E10.2	-2.45428	2.81018	2.0932e-15	2.81702e-13	1.89534	2.81018	8.75487e-10	5.71026e-08	0.00448307	2.81018	0.989252	1	yes	no
R09E10.3	acs-18	-1.10477	4.01579	1.42857e-06	5.75236e-05	1.20988	4.01579	1.17643e-07	5.15736e-06	0.0106085	4.01579	0.963711	1	yes	no
R09E10.6	R09E10.6	-1.20961	7.26234	4.11524e-18	6.90343e-16	1.19544	7.26234	9.25532e-18	1.42147e-15	0.305983	7.26234	0.027175	0.935204	yes	no
R102.10	R102.10	-1.35779	2.53806	1.81264e-05	0.000568699	1.60156	2.53806	3.54512e-07	1.44284e-05	0.213841	2.53806	0.513255	1	yes	no
R105.1	R105.1	-1.42949	3.88293	2.26255e-09	1.49939e-07	1.61639	3.88293	1.2283e-11	1.07457e-09	0.0983541	3.88293	0.687029	1	yes	no
R10D12.1	R10D12.1	-2.1563	2.48244	1.22979e-10	9.98351e-09	2.34503	2.48244	2.09354e-12	1.95136e-10	0.695909	2.48244	0.0467761	1	yes	no
R10D12.10	R10D12.10	-1.43665	1.70939	0.000104066	0.00265486	1.70181	1.70939	3.38178e-06	0.000109971	0.387181	1.70939	0.315558	1	yes	no
R10E4.3	R10E4.3	-1.56467	0.27967	0.00219201	0.036529	1.82051	0.27967	0.000279235	0.00591533	-0.576897	0.27967	0.340582	1	yes	no
R10E4.7	R10E4.7	-1.0968	4.0536	1.58509e-06	6.3433e-05	1.15135	4.0536	4.34317e-07	1.73197e-05	0.430639	4.0536	0.0611884	1	yes	no
R10E9.2	R10E9.2	-1.35509	5.7505	5.50307e-18	9.16392e-16	1.40575	5.7505	2.80204e-19	4.89936e-17	0.398222	5.7505	0.0111685	0.495917	yes	no
R10H10.2	spe-26	-1.11198	3.44055	1.97776e-05	0.000614986	1.47547	3.44055	1.22655e-08	6.58324e-07	-0.0969902	3.44055	0.716921	1	yes	no
R11A8.8	mpz-5	-1.28886	1.93616	0.000231229	0.0053632	1.51223	1.93616	1.30852e-05	0.000374489	0.0481926	1.93616	0.895741	1	yes	no
R11D1.3	R11D1.3	-4.51618	2.78846	3.81914e-29	1.20571e-26	4.39111	2.78846	1.33201e-27	3.78466e-25	4.11996	2.78846	3.55784e-24	2.74141e-21	yes	yes
R11E3.1	R11E3.1	-1.19487	3.39306	5.88983e-06	0.000205809	1.3963	3.39306	1.04676e-07	4.62009e-06	0.182033	3.39306	0.497896	1	yes	no
R13A1.3	R13A1.3	-1.12277	1.76063	0.001769	0.0303932	1.09643	1.76063	0.00216804	0.0364233	-0.0195787	1.76063	0.958553	1	yes	no
R13A5.11	R13A5.11	-1.61394	2.0587	3.22086e-06	0.000120315	1.57539	2.0587	4.98103e-06	0.000155845	0.639429	2.0587	0.0727292	1	yes	no
R13G10.4	R13G10.4	-2.42585	0.216051	6.26304e-05	0.00170493	3.22495	0.216051	1.84406e-08	9.55906e-07	0.930978	0.216051	0.174202	1	yes	no
R13H9.1	rmd-6	-1.54848	3.91606	1.03037e-10	8.50253e-09	1.63323	3.91606	8.14708e-12	7.23387e-10	0.535749	3.91606	0.0268227	0.926495	yes	no
R13H9.2	msp-57	-1.19941	7.29714	7.74557e-18	1.28044e-15	1.31208	7.29714	5.32684e-21	1.04381e-18	0.410246	7.29714	0.00305186	0.178789	yes	no
R13H9.4	msp-53	-1.21649	5.91577	1.29675e-15	1.77565e-13	1.30349	5.91577	9.88494e-18	1.51306e-15	0.0995644	5.91577	0.51451	1	yes	no
R13H9.6	R13H9.6	-1.40376	3.3284	1.77212e-07	8.58872e-06	1.45094	3.3284	6.01143e-08	2.80869e-06	0.457089	3.3284	0.0938268	1	yes	no
R148.7	R148.7	-1.3967	3.56092	5.7824e-08	3.05312e-06	1.47131	3.56092	9.92265e-09	5.41529e-07	0.405941	3.56092	0.119654	1	yes	no
R155.2	moa-1	-1.56423	3.72574	4.87388e-10	3.63232e-08	1.93053	3.72574	1.40597e-14	1.59792e-12	0.235602	3.72574	0.359292	1	yes	no
R155.3	R155.3	-1.65742	1.70542	6.7353e-06	0.000233201	1.6323	1.70542	8.5766e-06	0.000255338	0.16225	1.70542	0.679543	1	yes	no
R160.3	R160.3	-1.20966	2.22286	0.000274833	0.00623463	1.04627	2.22286	0.00167156	0.0290929	0.343329	2.22286	0.314792	1	yes	no
T01B10.1	grd-4	-1.44126	1.01287	0.00077796	0.0151789	1.80802	1.01287	1.67042e-05	0.000466457	0.157453	1.01287	0.732374	1	yes	no
T01B11.4	ant-1.4	-2.12438	2.46794	1.70412e-10	1.34732e-08	2.73238	2.46794	1.43036e-16	1.97646e-14	-0.250653	2.46794	0.49526	1	yes	no
T01C3.5	irld-14	-1.28479	1.65137	0.000619104	0.0125256	1.6285	1.65137	1.00373e-05	0.000293822	0.199617	1.65137	0.611352	1	yes	no
T02B11.9	T02B11.9	-1.57169	1.30935	0.000100032	0.00256489	1.95411	1.30935	8.58056e-07	3.19215e-05	0.205289	1.30935	0.635078	1	yes	no
T02B5.3	T02B5.3	-2.69155	4.86649	2.58445e-40	1.32013e-37	2.37256	4.86649	5.83752e-32	2.04138e-29	1.26344	4.86649	4.46269e-10	1.09074e-07	yes	yes
T02D1.8	T02D1.8	-1.08343	4.85651	1.34163e-08	7.95202e-07	1.10586	4.85651	6.09744e-09	3.43915e-07	0.228976	4.85651	0.234181	1	yes	no
T02E1.1	spe-12	-1.17576	2.14107	0.000528899	0.0109342	1.39441	2.14107	3.30645e-05	0.000861871	0.472637	2.14107	0.172318	1	yes	no
T02E1.5	dhs-3	-1.21312	6.18417	4.74972e-16	7.01062e-14	1.26396	6.18417	2.49996e-17	3.66615e-15	0.288961	6.18417	0.0532472	1	yes	no
T02E1.6	T02E1.6	-1.23502	3.27236	4.96922e-06	0.000176765	1.32613	3.27236	8.46575e-07	3.15202e-05	0.142074	3.27236	0.607575	1	yes	no
T02E1.7	T02E1.7	-1.74218	1.8542	1.84164e-06	7.30566e-05	2.31686	1.8542	1.13669e-10	8.55551e-09	-0.407688	1.8542	0.318649	1	yes	no
T02H6.7	T02H6.7	-1.58269	1.36607	8.3382e-05	0.00218606	1.57799	1.36607	7.7882e-05	0.0018674	0.416384	1.36607	0.326189	1	yes	no
T03D3.1	ugt-53	-1.87048	2.80417	1.92875e-09	1.29326e-07	1.89521	2.80417	1.03593e-09	6.66728e-08	0.0324682	2.80417	0.922329	1	yes	no
T03D8.6	T03D8.6	-1.12291	3.07924	6.12271e-05	0.00166973	0.973068	3.07924	0.000513858	0.0102413	0.178492	3.07924	0.532684	1	yes	no
T03F1.10	clec-53	-1.11386	2.71103	0.00016586	0.00399372	0.440969	2.71103	0.140365	0.966251	-0.616311	2.71103	0.0489127	1	no	no
T03F1.5	gsp-4	-1.3219	5.39712	4.82607e-15	6.26852e-13	1.31466	5.39712	5.97333e-15	7.05334e-13	0.245667	5.39712	0.147345	1	yes	no
T03F6.10	T03F6.10	-1.81386	1.78847	1.51761e-06	6.0947e-05	1.78597	1.78847	2.07505e-06	7.07681e-05	1.18764	1.78847	0.00197719	0.125014	yes	no
T03F6.6	T03F6.6	-1.35366	3.81772	2.67506e-08	1.50137e-06	1.58782	3.81772	5.97859e-11	4.71863e-09	0.343153	3.81772	0.163627	1	yes	no
T04A8.5	ppat-1	-1.18263	4.27238	7.54442e-08	3.87544e-06	0.921602	4.27238	2.79392e-05	0.000739316	0.749543	4.27238	0.000671043	0.0500924	yes	no
T04B2.2	frk-1	-1.36612	2.66897	1.20415e-05	0.000395821	1.80684	2.66897	5.09229e-09	2.91563e-07	0.38098	2.66897	0.234533	1	yes	no
T04B2.6	dhs-31	-1.65106	0.554878	0.000339394	0.00749718	1.73384	0.554878	0.000151169	0.00340045	-1.36264	0.554878	0.020304	0.765374	yes	no
T04B2.7	T04B2.7	-1.25497	2.37035	7.89914e-05	0.00207935	1.2446	2.37035	8.58554e-05	0.00203497	-0.120468	2.37035	0.716569	1	yes	no
T04F3.3	T04F3.3	-1.30094	2.96888	7.03832e-06	0.000242585	1.65926	2.96888	8.12994e-09	4.49083e-07	0.303087	2.96888	0.306169	1	yes	no
T05A12.4	T05A12.4	-1.11706	4.80369	6.5534e-09	4.08115e-07	1.14202	4.80369	2.93815e-09	1.76215e-07	1.06729	4.80369	2.87184e-08	5.46262e-06	yes	yes
T05A7.6	T05A7.6	-1.10785	4.51703	4.96598e-08	2.65911e-06	1.32063	4.51703	7.30459e-11	5.70574e-09	0.103393	4.51703	0.615125	1	yes	no
T05B4.14	T05B4.14	-1.27674	1.30368	0.00158628	0.0278111	1.59293	1.30368	6.29998e-05	0.00154546	0.618354	1.30368	0.13725	1	yes	no
T05C12.1	T05C12.1	-1.29426	3.44682	6.74201e-07	2.89423e-05	1.30167	3.44682	5.35454e-07	2.08232e-05	0.115791	3.44682	0.663174	1	yes	no
T05C12.3	decr-1.3	-2.47689	1.93857	3.39245e-11	3.02994e-09	2.67936	1.93857	5.14057e-13	5.17025e-11	0.494778	1.93857	0.223289	1	yes	no
T05C12.5	dylt-3	-1.67938	0.559019	0.000509307	0.0105921	1.46518	0.559019	0.00263681	0.0430575	0.808388	0.559019	0.110875	1	yes	no
T05C3.2	T05C3.2	-1.97348	0.843565	1.82335e-05	0.000571271	1.41597	0.843565	0.00266799	0.0435041	0.485536	0.843565	0.335758	1	yes	no
T05C3.6	T05C3.6	-1.18769	4.29522	4.43102e-08	2.38954e-06	0.927044	4.29522	1.91307e-05	0.000526772	0.246365	4.29522	0.262178	1	yes	no
T05D4.5	T05D4.5	-1.65364	3.29662	1.42546e-09	9.83605e-08	1.66833	3.29662	9.13179e-10	5.93906e-08	0.490958	3.29662	0.0778056	1	yes	no
T05E12.6	T05E12.6	-2.91674	4.96794	7.65537e-46	4.40533e-43	3.57891	4.96794	5.08431e-67	4.91783e-64	-0.329717	4.96794	0.144965	1	yes	no
T05F1.10	dhs-4	-1.85175	2.48896	4.4986e-08	2.42025e-06	1.74083	2.48896	2.6904e-07	1.11494e-05	1.23654	2.48896	0.000311457	0.0261239	yes	yes
T05F1.5	T05F1.5	-1.78986	3.65356	4.41113e-12	4.32186e-10	2.01591	3.65356	5.57251e-15	6.6144e-13	0.519134	3.65356	0.0484976	1	yes	no
T05F1.8	T05F1.8	-1.46322	3.27864	7.07533e-08	3.65929e-06	1.5653	3.27864	7.08081e-09	3.96918e-07	0.0994109	3.27864	0.721777	1	yes	no
T05G5.6	ech-6	-1.08085	7.41805	6.38968e-15	8.25231e-13	0.991622	7.41805	7.72115e-13	7.58124e-11	-0.024586	7.41805	0.858781	1	yes	no
T05H4.2	fbxa-196	-1.34216	1.71641	0.000229466	0.00533049	1.46141	1.71641	5.11568e-05	0.00128134	-0.169396	1.71641	0.663771	1	yes	no
T06A4.2	mps-3	-1.17105	1.51155	0.00179879	0.0308701	1.24455	1.51155	0.000823728	0.0155998	-0.137676	1.51155	0.729408	1	yes	no
T06C10.3	T06C10.3	-1.72377	2.38333	2.37912e-07	1.11964e-05	2.05635	2.38333	5.03567e-10	3.41172e-08	0.486217	2.38333	0.160756	1	yes	no
T06C10.6	kin-26	-1.23547	1.59482	0.00129512	0.0233085	1.74443	1.59482	3.35299e-06	0.000109348	0.507512	1.59482	0.198337	1	yes	no
T06D4.4	nep-20	-1.86148	1.7371	7.69572e-07	3.27273e-05	2.0457	1.7371	4.03764e-08	1.95064e-06	0.713443	1.7371	0.0690473	1	yes	no
T06D8.1	srap-1	-1.23859	5.32983	4.18433e-13	4.55081e-11	1.1456	5.32983	1.78957e-11	1.54375e-09	0.296033	5.32983	0.0842738	1	yes	no
T07C12.9	anmt-3	-1.0926	5.37031	1.12251e-10	9.22796e-09	1.00817	5.37031	2.48109e-09	1.50591e-07	0.347575	5.37031	0.0408016	1	yes	no
T07E3.2	T07E3.2	-1.36839	0.748405	0.0028043	0.0449687	1.62483	0.748405	0.000304229	0.00640897	0.257064	0.748405	0.599135	1	yes	no
T08A9.12	spp-2	-1.21915	4.37471	9.62836e-09	5.85964e-07	1.37202	4.37471	1.03661e-10	7.88052e-09	0.932744	4.37471	1.13135e-05	0.00137888	yes	yes
T08B1.3	alh-5	-2.76679	2.52927	1.20188e-13	1.38677e-11	2.70599	2.52927	4.00973e-13	4.06889e-11	2.31303	2.52927	8.77345e-10	2.05593e-07	yes	yes
T08B2.12	T08B2.12	-1.2001	5.90199	3.1982e-15	4.2143e-13	1.00285	5.90199	4.15102e-11	3.35727e-09	0.526546	5.90199	0.000539133	0.0415415	yes	yes
T08B6.4	T08B6.4	-1.41747	5.18017	1.26797e-15	1.74148e-13	1.58174	5.18017	4.24794e-19	7.37083e-17	0.128383	5.18017	0.473004	1	yes	no
T08B6.9	T08B6.9	-1.13943	2.41876	0.000351719	0.00772814	1.90909	2.41876	1.29051e-09	8.17099e-08	-0.70243	2.41876	0.041648	1	yes	no
T08G11.2	T08G11.2	-1.75464	2.45038	9.98605e-08	5.03858e-06	2.00464	2.45038	8.87183e-10	5.77826e-08	0.738381	2.45038	0.0287563	0.977048	yes	no
T08G3.4	T08G3.4	-2.23748	1.44382	2.39386e-08	1.35357e-06	2.47008	1.44382	4.66436e-10	3.18867e-08	-0.29379	1.44382	0.525191	1	yes	no
T08G3.7	T08G3.7	-2.20489	1.47699	4.2241e-08	2.28066e-06	2.29901	1.47699	8.45188e-09	4.663e-07	0.0531242	1.47699	0.906647	1	yes	no
T08G5.10	mtl-2	-1.03208	6.48363	1.24563e-12	1.30178e-10	1.07084	6.48363	1.64876e-13	1.7035e-11	0.452612	6.48363	0.00180778	0.116738	yes	no
T08H10.1	T08H10.1	-1.18037	6.36674	7.90177e-16	1.12963e-13	0.82584	6.36674	1.57845e-08	8.25755e-07	-0.385632	6.36674	0.00925273	0.429223	yes	no
T08H10.3	T08H10.3	-1.21512	2.106	0.000370154	0.00809019	1.7233	2.106	2.944e-07	1.2167e-05	0.164976	2.106	0.641924	1	yes	no
T09A12.1	T09A12.1	-1.32378	1.68868	0.000381857	0.00827613	1.62892	1.68868	9.44325e-06	0.000278248	0.302359	1.68868	0.435834	1	yes	no
T09B4.3	T09B4.3	-1.36681	1.20122	0.000745992	0.0146622	1.26823	1.20122	0.00168888	0.0293494	0.36304	1.20122	0.391335	1	yes	no
T09B9.4	T09B9.4	-2.25927	4.55894	5.39887e-25	1.42127e-22	2.37121	4.55894	1.77994e-27	5.02595e-25	-0.111733	4.55894	0.633791	1	yes	no
T09F5.10	T09F5.10	-1.41451	1.87404	7.26595e-05	0.00193962	1.53502	1.87404	1.4438e-05	0.000408696	0.26415	1.87404	0.478788	1	yes	no
T09F5.11	fbxa-84	-1.73315	1.94206	1.41421e-06	5.70466e-05	1.05511	1.94206	0.00402777	0.0620279	0.116985	1.94206	0.762492	1	no	no
T09H2.1	cyp-34A4	-3.44443	3.10848	4.39303e-27	1.29683e-24	3.22559	3.10848	5.47511e-24	1.33104e-21	1.30701	3.10848	0.000104289	0.0102399	yes	yes
T10B10.4	T10B10.4	-1.09956	4.2127	5.18803e-07	2.28319e-05	0.761153	4.2127	0.000516277	0.0102805	0.421039	4.2127	0.0559914	1	yes	no
T10B9.2	cyp-13A5	-1.26225	1.44499	0.00103167	0.0193137	1.34222	1.44499	0.000491323	0.00985269	0.54344	1.44499	0.170227	1	yes	no
T10C6.18	T10C6.18	-1.79888	0.702947	0.000253125	0.00579715	1.69419	0.702947	0.000589408	0.0115946	-0.0707142	0.702947	0.901258	1	yes	no
T10E9.3	T10E9.3	-1.6778	2.00075	1.06835e-06	4.42334e-05	0.929343	2.00075	0.00813713	0.113091	0.250583	2.00075	0.488278	1	no	no
T10E9.4	T10E9.4	-1.43942	6.16031	9.23275e-22	2.03752e-19	1.74892	6.16031	3.79254e-31	1.27713e-28	0.0737432	6.16031	0.62436	1	yes	no
T10E9.9	acdh-4	-1.19069	2.71456	8.41021e-05	0.0022024	1.48929	2.71456	7.22538e-07	2.73045e-05	-0.00467823	2.71456	0.988041	1	yes	no
T10H4.11	cyp-34A2	-1.81974	1.90447	2.81037e-07	1.29314e-05	1.77918	1.90447	5.01424e-07	1.96004e-05	-1.41471	1.90447	0.00112547	0.0773767	yes	no
T10H9.5	pmp-5	-1.86835	5.81126	1.62638e-31	5.60128e-29	2.06221	5.81126	5.47659e-38	2.54052e-35	0.201427	5.81126	0.21358	1	yes	no
T11B7.2	T11B7.2	-1.26987	1.99934	0.000281143	0.00634683	1.1907	1.99934	0.000631964	0.0123145	0.124096	1.99934	0.733867	1	yes	no
T11B7.5	T11B7.5	-1.05553	2.93653	0.000301734	0.00676053	0.757419	2.93653	0.00976828	0.132126	0.971507	2.93653	0.00084465	0.0610471	no	no
T11F8.4	T11F8.4	-1.60959	1.55248	2.80327e-05	0.000832939	1.7597	1.55248	3.79663e-06	0.000121548	0.282691	1.55248	0.487821	1	yes	no
T12A2.1	T12A2.1	-1.45009	2.23225	1.74436e-05	0.000551847	1.28334	2.23225	0.000143077	0.00323443	0.645679	2.23225	0.0609854	1	yes	no
T13F2.10	msp-79	-1.12157	6.21392	3.69095e-14	4.52276e-12	1.12604	6.21392	2.70654e-14	2.96487e-12	0.299668	6.21392	0.0429003	1	yes	no
T13F2.11	msp-78	-1.08773	6.66194	2.81492e-14	3.46799e-12	1.24581	6.66194	3.1367e-18	5.07464e-16	0.2571	6.66194	0.0715067	1	yes	no
T13F2.12	ssp-36	-1.52033	1.20525	0.000243783	0.00561429	1.82195	1.20525	8.12831e-06	0.000243587	0.227471	1.20525	0.608742	1	yes	no
T13F2.9	T13F2.9	-1.91348	5.80512	1.58743e-33	6.23378e-31	2.17361	5.80512	1.46881e-42	7.67514e-40	0.258048	5.80512	0.105427	1	yes	no
T13F3.6	T13F3.6	-5.8572	5.57682	6.63426e-160	2.15429e-156	5.82188	5.57682	2.65176e-158	6.69731e-155	1.88034	5.57682	1.72897e-15	7.14552e-13	yes	yes
T13F3.8	T13F3.8	-1.9062	2.19936	5.00709e-08	2.67482e-06	2.37603	2.19936	6.38308e-12	5.75756e-10	0.787206	2.19936	0.0296955	0.997243	yes	no
T13H10.1	kin-5	-1.47016	3.13662	1.57988e-07	7.73122e-06	1.67236	3.13662	2.02376e-09	1.24833e-07	0.257357	3.13662	0.371044	1	yes	no
T14D7.3	snb-6	-1.21348	1.47033	0.00170445	0.029496	1.51766	1.47033	6.71354e-05	0.00163579	0.182548	1.47033	0.651434	1	yes	no
T14G10.8	T14G10.8	-1.05879	3.49124	4.46755e-05	0.0012662	1.45292	3.49124	1.73472e-08	9.04381e-07	0.185508	3.49124	0.481121	1	yes	no
T15B12.2	T15B12.2	-1.32784	2.43725	3.53799e-05	0.00102971	1.51657	2.43725	1.98602e-06	6.79358e-05	0.21149	2.43725	0.523881	1	yes	no
T15B7.3	col-143	-1.93983	9.29087	6.22117e-44	3.49161e-41	1.73904	9.29087	4.56514e-36	1.93959e-33	0.859218	9.29087	2.74094e-10	6.84647e-08	yes	yes
T15H9.5	T15H9.5	-2.26878	0.559838	7.96111e-06	0.00027212	2.1506	0.559838	2.27947e-05	0.000617195	1.21578	0.559838	0.0241482	0.869891	yes	no
T16A1.2	T16A1.2	-1.48682	1.03506	0.000422899	0.00903874	1.48083	1.03506	0.000416844	0.00849021	0.286557	1.03506	0.523852	1	yes	no
T16A9.5	T16A9.5	-1.43334	5.56518	2.17008e-18	3.7511e-16	1.7353	5.56518	3.75021e-26	9.79817e-24	0.283104	5.56518	0.0853601	1	yes	no
T16G1.13	T16G1.13	-1.31662	1.54113	0.000508162	0.0105776	1.60159	1.54113	1.86737e-05	0.000515437	-0.267164	1.54113	0.515278	1	yes	no
T16G1.6	T16G1.6	-1.83972	3.30483	1.06514e-11	1.00253e-09	1.62332	3.30483	1.94312e-09	1.20185e-07	-1.27479	3.30483	2.95881e-05	0.00326482	yes	no
T16G1.7	T16G1.7	-1.24603	5.43872	9.26092e-14	1.0907e-11	0.875187	5.43872	1.61978e-07	6.96658e-06	0.15102	5.43872	0.369846	1	yes	no
T16G12.7	T16G12.7	-1.88598	1.49796	2.6803e-06	0.000102222	2.30965	1.49796	4.77451e-09	2.74752e-07	0.196761	1.49796	0.653565	1	yes	no
T16H12.6	kel-10	-1.47405	4.05957	1.59841e-10	1.27483e-08	1.72998	4.05957	5.44608e-14	5.90893e-12	0.126932	4.05957	0.589688	1	yes	no
T17H7.1	T17H7.1	-3.53659	2.46012	6.23426e-22	1.39614e-19	3.06047	2.46012	1.09437e-16	1.52611e-14	1.6347	2.46012	2.52613e-05	0.00287101	yes	yes
T19B10.1	cyp-29A2	-1.30657	2.18539	9.03489e-05	0.00234304	0.939568	2.18539	0.00513614	0.0760568	-0.171964	2.18539	0.626414	1	no	no
T19D12.5	T19D12.5	-1.52419	1.57614	9.4517e-05	0.00243723	1.94688	1.57614	3.84108e-07	1.55062e-05	0.62847	1.57614	0.120568	1	yes	no
T19H12.1	ugt-9	-1.95262	2.43434	5.61876e-09	3.53787e-07	2.37889	2.43434	8.55545e-13	8.32846e-11	0.776105	2.43434	0.0248296	0.886013	yes	no
T19H12.6	T19H12.6	-3.81492	2.50937	1.98135e-10	1.56379e-08	3.46226	2.50937	2.03451e-08	1.0451e-06	6.62681	2.50937	1.66893e-40	2.81005e-37	yes	yes
T19H12.9	ugt-12	-1.46116	4.80542	2.08396e-14	2.59559e-12	1.24141	4.80542	7.33943e-11	5.72312e-09	-0.610832	4.80542	0.00206439	0.128914	yes	no
T20D4.10	T20D4.10	-3.52555	1.16077	7.69691e-10	5.56294e-08	4.05952	1.16077	1.75178e-13	1.80585e-11	3.86089	1.16077	3.96862e-12	1.21904e-09	yes	yes
T20D4.11	T20D4.11	-3.89767	2.27434	1.75143e-16	2.64524e-14	4.31171	2.27434	1.08112e-20	2.05644e-18	4.73478	2.27434	1.9723e-25	1.60112e-22	yes	yes
T20D4.3	T20D4.3	-3.65637	1.34391	1.18565e-12	1.2506e-10	3.26814	1.34391	3.97277e-10	2.74478e-08	4.05144	1.34391	6.82251e-16	2.98229e-13	yes	yes
T20D4.4	T20D4.4	-3.52111	1.24422	5.65432e-11	4.87763e-09	3.38259	1.24422	3.48488e-10	2.43358e-08	4.17136	1.24422	6.93893e-16	3.00429e-13	yes	yes
T20D4.5	T20D4.5	-4.40883	1.05283	3.07664e-13	3.4031e-11	3.62811	1.05283	1.32506e-08	7.0537e-07	4.64821	1.05283	4.85384e-15	1.95275e-12	yes	yes
T20D4.6	arrd-22	-1.2836	2.06085	0.000327877	0.00726446	0.961842	2.06085	0.00767737	0.107292	1.4784	2.06085	2.86675e-05	0.00319425	no	yes
T20F5.5	T20F5.5	-2.02425	1.94718	1.6093e-08	9.39155e-07	1.99087	1.94718	2.45498e-08	1.23731e-06	0.45722	1.94718	0.227269	1	yes	no
T20H4.2	T20H4.2	-1.25983	1.14219	0.00283729	0.0454337	1.74136	1.14219	2.36252e-05	0.000637403	0.7285	1.14219	0.0918154	1	yes	no
T21B4.9	srh-70	-1.60157	0.386973	0.00214652	0.035929	2.29693	0.386973	4.27474e-06	0.00013533	0.385023	0.386973	0.49632	1	yes	no
T21B6.2	pho-7	-1.35593	2.59681	1.57927e-05	0.000504534	1.47491	2.59681	2.38377e-06	7.98712e-05	0.280358	2.59681	0.385837	1	yes	no
T21G5.1	T21G5.1	-1.32939	2.80744	7.60213e-06	0.000261027	1.26892	2.80744	1.81296e-05	0.000501637	0.197981	2.80744	0.516187	1	yes	no
T21G5.4	smz-2	-1.20949	4.94943	8.45413e-11	7.06495e-09	1.48339	4.94943	1.52361e-15	1.92402e-13	0.350779	4.94943	0.0611848	1	yes	no
T22A3.6	T22A3.6	-1.4759	0.859424	0.000751266	0.0147403	1.7627	0.859424	4.1884e-05	0.00106971	-0.277151	0.859424	0.572135	1	yes	no
T22B3.2	alg-3	-1.19654	4.60751	2.09332e-09	1.39333e-07	1.56126	4.60751	4.90765e-15	5.85582e-13	-0.0075191	4.60751	0.970462	1	yes	no
T22B3.3	T22B3.3	-1.04509	3.75407	1.81688e-05	0.000569636	1.2128	3.75407	6.03998e-07	2.30549e-05	0.225711	3.75407	0.359811	1	yes	no
T22B7.7	T22B7.7	-4.466	5.77174	3.25139e-132	7.39057e-129	3.88726	5.77174	2.39146e-103	4.02659e-100	0.181342	5.77174	0.344685	1	yes	no
T22C1.8	T22C1.8	-1.29723	3.74831	1.47493e-07	7.25671e-06	1.5531	3.74831	2.72696e-10	1.928e-08	0.0619691	3.74831	0.805853	1	yes	no
T22C1.9	T22C1.9	-1.59436	2.73918	1.71171e-07	8.3404e-06	1.54426	2.73918	3.90565e-07	1.57407e-05	0.305917	2.73918	0.331302	1	yes	no
T22H9.3	wago-10	-1.41086	1.61292	0.000161217	0.00390247	1.5622	1.61292	2.48588e-05	0.000666337	0.0786733	1.61292	0.842807	1	yes	no
T23B3.5	T23B3.5	-1.24422	5.2302	1.01415e-12	1.07721e-10	1.25042	5.2302	6.91627e-13	6.8801e-11	0.143966	5.2302	0.412819	1	yes	no
T23B7.1	nspd-4	-1.50001	4.23518	1.05179e-11	9.94085e-10	1.54518	4.23518	2.19987e-12	2.04516e-10	0.39304	4.23518	0.0777983	1	yes	no
T23B7.2	T23B7.2	-1.74401	0.801669	8.85155e-05	0.00230075	1.65574	0.801669	0.000188855	0.00416368	0.0364803	0.801669	0.940948	1	yes	no
T23F11.2	T23F11.2	-1.45722	3.82012	1.95055e-09	1.30595e-07	1.37689	3.82012	1.31285e-08	6.99687e-07	0.259414	3.82012	0.292701	1	yes	no
T23F6.3	T23F6.3	-1.73594	2.12477	5.78414e-07	2.52839e-05	2.28567	2.12477	2.59068e-11	2.19729e-09	-0.0258428	2.12477	0.944911	1	yes	no
T23G11.1	T23G11.1	-1.2447	4.7846	9.23908e-11	7.67857e-09	1.62226	4.7846	2.98651e-17	4.3516e-15	-0.00543288	4.7846	0.977789	1	yes	no
T25B9.4	T25B9.4	-1.46985	2.23676	9.48353e-06	0.000318178	1.56194	2.23676	2.18629e-06	7.38405e-05	0.187731	2.23676	0.586813	1	yes	no
T25B9.6	T25B9.6	-1.59444	2.91961	6.90967e-08	3.57768e-06	1.93106	2.91961	5.25723e-11	4.1783e-09	0.299178	2.91961	0.327575	1	yes	no
T25D10.5	btb-2	-1.74821	1.271	2.56953e-05	0.000770536	2.20758	1.271	5.73075e-08	2.69138e-06	-0.20853	1.271	0.655941	1	yes	no
T26A5.1	wht-6	-1.26023	3.08858	5.86846e-06	0.00020522	1.24881	3.08858	6.73883e-06	0.000206438	0.0298967	3.08858	0.916811	1	yes	no
T26C12.6	clec-173	-2.08478	2.90882	9.83798e-12	9.33704e-10	1.65634	2.90882	6.91197e-08	3.17399e-06	-0.156823	2.90882	0.637417	1	yes	no
T26H2.9	nhr-79	-1.40243	2.98276	1.12713e-06	4.64555e-05	1.21712	2.98276	2.40492e-05	0.00064769	0.286109	2.98276	0.332391	1	yes	no
T27A3.3	ssp-16	-1.53321	4.28166	2.17511e-12	2.18767e-10	1.66138	4.28166	2.42455e-14	2.67847e-12	0.333955	4.28166	0.130773	1	yes	no
T27A3.5	T27A3.5	-1.82787	3.03876	2.62891e-10	2.03253e-08	1.88983	3.03876	5.42595e-11	4.30487e-09	0.213564	3.03876	0.476788	1	yes	no
T27C10.7	nspd-10	-1.09338	4.82263	7.92474e-09	4.91496e-07	0.987758	4.82263	1.7485e-07	7.48479e-06	0.199281	4.82263	0.29639	1	yes	no
T27C10.8	T27C10.8	-1.04743	2.7983	0.000441075	0.00933505	1.24376	2.7983	2.63189e-05	0.000701396	0.304449	2.7983	0.314977	1	yes	no
T27D12.1	T27D12.1	-1.39906	4.46147	7.85915e-12	7.50598e-10	1.05683	4.46147	2.33576e-07	9.76871e-06	-0.414939	4.46147	0.0485677	1	yes	no
T27E4.6	oac-50	-2.54249	1.14022	1.49712e-08	8.79186e-07	2.63021	1.14022	3.48124e-09	2.06337e-07	1.13532	1.14022	0.0186522	0.72225	yes	no
T27E7.1	T27E7.1	-1.48025	5.53868	2.82128e-19	5.21374e-17	1.60964	5.53868	1.58889e-22	3.39119e-20	0.38425	5.53868	0.0201341	0.761496	yes	no
T27F6.1	T27F6.1	-1.77437	0.327367	0.000870347	0.0166738	2.30853	0.327367	7.34958e-06	0.00022245	0.713928	0.327367	0.211028	1	yes	no
T28A11.16	T28A11.16	-2.85619	1.481	2.336e-08	1.3225e-06	3.10665	1.481	6.83369e-10	4.50241e-08	3.43584	1.481	3.38022e-12	1.05252e-09	yes	yes
T28A11.19	T28A11.19	-4.91162	1.54801	8.08757e-09	5.00663e-07	5.24463	1.54801	1.46358e-10	1.08013e-08	7.01844	1.54801	4.13963e-24	3.13653e-21	yes	yes
T28A11.2	T28A11.2	-2.73555	4.58894	6.00679e-33	2.29474e-30	3.02328	4.58894	5.3062e-40	2.53921e-37	2.85249	4.58894	7.08234e-36	1.00616e-32	yes	yes
T28B8.4	T28B8.4	-1.64098	3.39433	5.00647e-10	3.72503e-08	1.31899	3.39433	5.52952e-07	2.13938e-05	-0.011031	3.39433	0.967645	1	yes	no
T28B8.6	T28B8.6	-1.49262	1.89808	2.4125e-05	0.000728251	1.69949	1.89808	1.20898e-06	4.36549e-05	-0.0335928	1.89808	0.928881	1	yes	no
T28C6.5	T28C6.5	-1.53442	1.51933	0.000105517	0.00268735	1.99532	1.51933	2.73315e-07	1.13162e-05	0.55095	1.51933	0.182544	1	yes	no
T28F4.3	T28F4.3	-1.45378	2.29054	8.99365e-06	0.000303759	1.32848	2.29054	4.81762e-05	0.00121337	0.152325	2.29054	0.654926	1	yes	no
T28H11.1	ssq-4	-1.11192	7.95166	4.93719e-16	7.24631e-14	1.21495	7.95166	8.45886e-19	1.43488e-16	0.271989	7.95166	0.0455455	1	yes	no
T28H11.5	ssq-2	-1.2619	7.63586	7.96142e-20	1.54673e-17	1.35939	7.63586	1.05331e-22	2.29113e-20	0.392381	7.63586	0.00425164	0.236868	yes	no
T28H11.6	ssp-11	-1.46178	5.2602	8.8952e-17	1.36616e-14	1.65505	5.2602	4.27469e-21	8.4861e-19	0.598032	5.2602	0.000674168	0.0502432	yes	no
T28H11.7	T28H11.7	-1.14191	4.24329	1.66329e-07	8.12189e-06	1.46011	4.24329	1.92173e-11	1.64837e-09	0.374589	4.24329	0.0883976	1	yes	no
W01A11.5	cpt-6	-1.01434	3.72501	4.48815e-05	0.00127046	1.17284	3.72501	2.1392e-06	7.26289e-05	0.667412	3.72501	0.007331	0.354171	yes	no
W01A8.8	W01A8.8	-1.80437	3.0809	2.10385e-10	1.65187e-08	1.51263	3.0809	9.67172e-08	4.31414e-06	-0.183435	3.0809	0.539738	1	yes	no
W01B11.2	sulp-6	-1.35763	2.11126	6.63353e-05	0.00178721	1.74205	2.11126	2.23744e-07	9.41433e-06	-0.196544	2.11126	0.588589	1	yes	no
W01B6.2	W01B6.2	-1.33121	3.69782	1.21015e-07	6.05221e-06	1.62914	3.69782	7.79346e-11	6.04605e-09	0.385704	3.69782	0.129873	1	yes	no
W01B6.5	W01B6.5	-1.57108	1.285	6.97942e-05	0.00187193	1.54431	1.285	8.92541e-05	0.00211112	0.00662016	1.285	0.987602	1	yes	no
W01B6.6	W01B6.6	-1.51233	1.91181	1.82895e-05	0.00057263	1.56508	1.91181	8.52824e-06	0.000254231	0.501637	1.91181	0.169643	1	yes	no
W01C9.4	decr-1.2	-1.41723	3.13957	4.04392e-07	1.81841e-05	1.5326	3.13957	3.73693e-08	1.81889e-06	0.207567	3.13957	0.469949	1	yes	no
W01D2.3	W01D2.3	-1.06999	2.63498	0.000538412	0.0111056	1.27684	2.63498	3.1467e-05	0.000824508	0.317122	2.63498	0.313567	1	yes	no
W02A2.8	W02A2.8	-1.38828	1.71139	0.0001863	0.00442496	1.73251	1.71139	2.18788e-06	7.38405e-05	-0.0839417	1.71139	0.833201	1	yes	no
W02B12.12	W02B12.12	-1.47979	4.94794	2.20857e-15	2.95305e-13	1.4722	4.94794	2.69456e-15	3.31075e-13	0.255113	4.94794	0.175214	1	yes	no
W02D3.7	lbp-5	-1.37878	4.29291	2.60622e-10	2.01842e-08	1.35986	4.29291	4.22489e-10	2.90571e-08	0.330677	4.29291	0.134731	1	yes	no
W02D7.2	clec-218	-2.66882	5.28958	2.68226e-48	1.62584e-45	2.05767	5.28958	5.99243e-30	1.89182e-27	0.0728922	5.28958	0.696053	1	yes	no
W02D7.4	W02D7.4	-1.16866	3.72265	3.53286e-06	0.000131001	1.29645	3.72265	2.38453e-07	9.94524e-06	0.683246	3.72265	0.00691816	0.338148	yes	no
W02F12.2	W02F12.2	-1.089	1.91278	0.00253564	0.04148	1.14967	1.91278	0.00130857	0.0233564	0.983269	1.91278	0.00623898	0.31373	yes	no
W02H3.1	W02H3.1	-1.67182	2.02803	2.95525e-06	0.000111308	1.56928	2.02803	1.11521e-05	0.00032354	0.923703	2.02803	0.011532	0.506038	yes	no
W02H5.8	W02H5.8	-1.50017	3.27956	4.87545e-08	2.61989e-06	1.65585	3.27956	1.49372e-09	9.43141e-08	0.598609	3.27956	0.0319944	1	yes	no
W03B1.3	W03B1.3	-1.64488	0.58775	0.000459592	0.00967741	1.74651	0.58775	0.000176011	0.00391279	0.163324	0.58775	0.750752	1	yes	no
W03C9.1	W03C9.1	-1.55708	1.37703	6.97507e-05	0.00187186	1.41409	1.37703	0.000296966	0.00626468	0.486944	1.37703	0.232137	1	yes	no
W03C9.8	W03C9.8	-1.38488	1.0639	0.00105713	0.0196878	1.61538	1.0639	0.000103375	0.00240385	0.308007	1.0639	0.490523	1	yes	no
W03D8.1	W03D8.1	-1.63275	0.886101	0.000231107	0.00536312	1.76845	0.886101	5.49168e-05	0.00136902	0.761593	0.886101	0.0996714	1	yes	no
W03D8.10	W03D8.10	-3.21092	0.0968816	2.20096e-07	1.04444e-05	3.72063	0.0968816	5.21671e-10	3.52912e-08	-2.03796	0.0968816	0.0687477	1	yes	no
W03D8.2	W03D8.2	-1.53476	1.23243	0.000204071	0.00480438	1.58065	1.23243	0.000113237	0.00261445	0.528169	1.23243	0.222174	1	yes	no
W03D8.5	W03D8.5	-1.39862	1.81511	7.65221e-05	0.00202339	1.51834	1.81511	1.53714e-05	0.000432426	-0.475731	1.81511	0.217882	1	yes	no
W03D8.8	W03D8.8	-1.85223	3.99889	1.17331e-13	1.35725e-11	2.13752	3.99889	7.78419e-18	1.20777e-15	1.81162	3.99889	3.39807e-13	1.1779e-10	yes	yes
W03D8.9	W03D8.9	-1.37869	5.92275	2.47848e-19	4.61779e-17	1.6625	5.92275	2.72577e-27	7.51008e-25	0.338271	5.92275	0.0276328	0.948802	yes	no
W03F11.4	W03F11.4	-1.56592	4.37312	1.91592e-13	2.17206e-11	1.63837	4.37312	1.23999e-14	1.41993e-12	0.0592541	4.37312	0.785	1	yes	no
W03F8.2	W03F8.2	-1.53118	2.04323	1.30444e-05	0.000423882	1.65491	2.04323	2.08393e-06	7.10175e-05	0.410345	2.04323	0.26198	1	yes	no
W03G1.2	W03G1.2	-1.82696	1.90381	4.06057e-07	1.82408e-05	1.79497	1.90381	5.77741e-07	2.2183e-05	0.545721	1.90381	0.14779	1	yes	no
W03G1.3	W03G1.3	-1.47516	2.65488	2.21718e-06	8.62236e-05	1.38051	2.65488	9.38471e-06	0.000277127	0.353286	2.65488	0.271116	1	yes	no
W03G1.4	W03G1.4	-1.86953	3.92199	8.14134e-15	1.04552e-12	1.41973	3.92199	3.65746e-09	2.16218e-07	0.301099	3.92199	0.220774	1	yes	no
W03G9.5	W03G9.5	-1.61925	1.02945	0.000130525	0.00324075	1.80826	1.02945	1.52623e-05	0.000429889	0.0945455	1.02945	0.838135	1	yes	no
W03G9.6	paf-1	-1.25128	1.38253	0.00123909	0.0225142	1.34995	1.38253	0.000431478	0.00875689	-0.0680594	1.38253	0.868975	1	yes	no
W04A4.2	W04A4.2	-1.34275	4.84531	1.50722e-12	1.53977e-10	0.885637	4.84531	3.02734e-06	9.9729e-05	-0.166953	4.84531	0.388857	1	yes	no
W04E12.4	W04E12.4	-8.36342	0.121082	1.37854e-14	1.73601e-12	8.49367	0.121082	1.69481e-15	2.13429e-13	2.30756	0.121082	0.263563	1	yes	no
W04E12.5	W04E12.5	-1.75724	0.994393	4.67124e-05	0.00131818	1.64372	0.994393	0.000135474	0.00308557	0.428279	0.994393	0.354335	1	yes	no
W04E12.6	clec-49	-1.36993	4.33112	2.02713e-10	1.59714e-08	1.15013	4.33112	9.12693e-08	4.10405e-06	0.331162	4.33112	0.128816	1	yes	no
W05E10.1	W05E10.1	-1.49796	1.42693	0.000323794	0.00720158	1.73258	1.42693	2.26428e-05	0.000613812	0.584378	1.42693	0.179255	1	yes	no
W06D4.2	spe-46	-1.292	3.46818	6.95411e-07	2.97404e-05	1.53044	3.46818	3.62718e-09	2.14707e-07	0.0736375	3.46818	0.782296	1	yes	no
W06G6.11	W06G6.11	-5.37094	0.156567	3.74713e-10	2.82971e-08	5.56989	0.156567	2.97143e-11	2.48316e-09	4.54169	0.156567	8.95977e-07	0.000136127	yes	yes
W06G6.17	W06G6.17	-7.85325	0.163612	6.30009e-12	6.0938e-10	8.31282	0.163612	1.7772e-14	1.98509e-12	5.97503	0.163612	3.73038e-05	0.00400915	yes	yes
W07A12.8	W07A12.8	-2.40745	0.86176	4.85988e-07	2.15968e-05	2.68409	0.86176	1.14246e-08	6.18304e-07	1.09014	0.86176	0.0344334	1	yes	no
W07B8.1	W07B8.1	-1.12005	3.49646	2.73384e-05	0.000813904	0.337862	3.49646	0.213193	1	1.08768	3.49646	4.15215e-05	0.00442063	no	yes
W08E3.4	W08E3.4	-1.33871	1.6878	0.00034226	0.00754583	1.6604	1.6878	6.56671e-06	0.000201301	0.565565	1.6878	0.141026	1	yes	no
W09C3.2	W09C3.2	-1.23417	1.81356	0.000591612	0.0120445	1.69365	1.81356	1.69709e-06	5.88493e-05	-0.0166454	1.81356	0.965005	1	yes	no
W09C3.6	gsp-3	-1.24417	5.50835	4.28557e-14	5.22323e-12	1.50532	5.50835	6.41686e-20	1.17155e-17	0.215279	5.50835	0.193634	1	yes	no
W09D6.4	W09D6.4	-1.13241	3.46656	1.2759e-05	0.000416096	1.27936	3.46656	7.42571e-07	2.79917e-05	0.253816	3.46656	0.334506	1	yes	no
W10G11.3	W10G11.3	-2.71736	3.91827	1.90961e-26	5.45994e-24	2.86675	3.91827	2.89248e-29	8.82517e-27	1.60082	3.91827	4.18384e-10	1.02812e-07	yes	yes
W10G11.4	W10G11.4	-2.51675	0.101935	5.51309e-05	0.00152267	2.8373	0.101935	3.44978e-06	0.000111862	1.85142	0.101935	0.00482515	0.260828	yes	no
Y105C5A.25	Y105C5A.25	-1.06397	2.53549	0.000782476	0.015229	0.751088	2.53549	0.018286	0.220621	0.264244	2.53549	0.414821	1	no	no
Y105C5B.17	Y105C5B.17	-1.21611	1.44986	0.00118526	0.0217096	0.982028	1.44986	0.00882672	0.121546	-0.415014	1.44986	0.304103	1	no	no
Y105C5B.18	Y105C5B.18	-1.25526	2.62071	5.06342e-05	0.00141741	1.37887	2.62071	7.51883e-06	0.000227017	0.218986	2.62071	0.490832	1	yes	no
Y105C5B.28	gln-3	-1.49557	7.90401	6.27905e-27	1.81816e-24	1.14771	7.90401	1.03543e-16	1.44835e-14	1.25301	7.90401	1.43783e-19	8.06978e-17	yes	yes
Y105C5B.5	Y105C5B.5	-1.51065	5.08374	1.36495e-16	2.07531e-14	1.68221	5.08374	3.20296e-20	5.96762e-18	0.241172	5.08374	0.191396	1	yes	no
Y105E8A.27	Y105E8A.27	-1.65041	3.24804	1.79092e-09	1.21008e-07	1.54763	3.24804	1.53748e-08	8.06176e-07	0.321582	3.24804	0.251667	1	yes	no
Y106G6A.4	Y106G6A.4	-1.53338	4.85413	8.67045e-16	1.22412e-13	1.40496	4.85413	1.48001e-13	1.53614e-11	0.362958	4.85413	0.0584788	1	yes	no
Y106G6D.3	Y106G6D.3	-1.31263	4.49925	1.59421e-10	1.27372e-08	1.35776	4.49925	3.35228e-11	2.75584e-09	0.243062	4.49925	0.241313	1	yes	no
Y106G6H.13	Y106G6H.13	-1.27412	4.37954	1.77358e-09	1.20341e-07	1.3954	4.37954	3.89584e-11	3.16832e-09	0.395569	4.37954	0.0637403	1	yes	no
Y113G7C.1	Y113G7C.1	-1.46078	4.75917	4.55428e-14	5.52112e-12	1.60096	4.75917	1.23783e-16	1.72089e-14	0.0915341	4.75917	0.640963	1	yes	no
Y116A8C.23	Y116A8C.23	-1.44548	2.13971	2.25503e-05	0.00068849	1.74175	2.13971	2.38423e-07	9.94524e-06	-0.137062	2.13971	0.706618	1	yes	no
Y116A8C.24	Y116A8C.24	-1.14448	1.80914	0.00115918	0.0213264	1.12302	1.80914	0.0013337	0.0237677	-0.0866096	1.80914	0.814177	1	yes	no
Y116A8C.33	Y116A8C.33	-1.31516	2.64824	1.50039e-05	0.000480009	1.24761	2.64824	3.86498e-05	0.00099325	-0.106155	2.64824	0.736887	1	yes	no
Y116A8C.38	Y116A8C.38	-1.04648	1.88266	0.00291705	0.0465632	1.35712	1.88266	8.77551e-05	0.00207707	-0.185608	1.88266	0.616221	1	yes	no
Y116A8C.4	nep-23	-1.28828	1.68353	0.000495476	0.010342	1.7594	1.68353	1.25088e-06	4.50603e-05	-0.123049	1.68353	0.755342	1	yes	no
Y116F11A.6	Y116F11A.6	-2.20398	0.468093	5.09499e-05	0.00142319	1.93645	0.468093	0.000421016	0.00856367	1.65799	0.468093	0.00300111	0.176499	yes	no
Y116F11B.10	Y116F11B.10	-1.37635	1.71823	0.000151956	0.0037217	1.26386	1.71823	0.000494589	0.0099007	-0.584179	1.71823	0.146312	1	yes	no
Y116F11B.7	Y116F11B.7	-1.69936	0.52388	0.000360844	0.0079019	1.38895	0.52388	0.00390151	0.0603082	0.317243	0.52388	0.540761	1	no	no
Y116F11B.8	Y116F11B.8	-1.81585	0.569735	0.000132608	0.00328707	1.95195	0.569735	3.32819e-05	0.000865576	0.206928	0.569735	0.694092	1	yes	no
Y119C1B.1	Y119C1B.1	-1.25685	2.21526	0.000175182	0.00419154	1.53073	2.21526	3.80414e-06	0.000121703	0.276031	2.21526	0.424453	1	yes	no
Y11D7A.3	Y11D7A.3	-1.20311	5.5368	2.05413e-13	2.31719e-11	1.4105	5.5368	6.6739e-18	1.04983e-15	0.289874	5.5368	0.0777624	1	yes	no
Y17G9A.4	Y17G9A.4	-3.04866	0.894479	5.66789e-10	4.18972e-08	3.0373	0.894479	5.66295e-10	3.80271e-08	0.866972	0.894479	0.126926	1	yes	no
Y18D10A.21	Y18D10A.21	-1.61154	1.72958	1.38414e-05	0.000447543	1.64391	1.72958	8.45635e-06	0.000252751	-0.0284564	1.72958	0.94344	1	yes	no
Y18H1A.10	Y18H1A.10	-1.27393	2.36019	8.63626e-05	0.0022551	1.44301	2.36019	7.40455e-06	0.000223964	-0.0859795	2.36019	0.800461	1	yes	no
Y19D10A.11	Y19D10A.11	-1.58797	2.27109	1.01386e-06	4.21307e-05	-0.633487	2.27109	0.0768377	0.657343	-0.366481	2.27109	0.295888	1	no	no
Y19D10A.12	mct-1	-1.65757	7.75312	1.42567e-32	5.22679e-30	0.172117	7.75312	0.209935	1	0.000940607	7.75312	0.994538	1	no	no
Y19D10A.16	Y19D10A.16	-1.54929	4.34203	1.0693e-12	1.1305e-10	-0.38206	4.34203	0.0941996	0.753282	0.681521	4.34203	0.0018499	0.118615	no	no
Y19D10A.4	Y19D10A.4	-1.53653	2.78173	3.53858e-07	1.60386e-05	-0.040118	2.78173	0.899322	1	0.0187148	2.78173	0.952655	1	no	no
Y19D10A.7	irld-53	-4.05719	2.92604	2.84741e-35	1.17678e-32	-0.648343	2.92604	0.104614	0.808818	-3.79291	2.92604	2.26744e-10	5.82375e-08	no	no
Y19D10A.9	clec-209	-1.10155	8.89851	5.40264e-16	7.89741e-14	-0.243878	8.89851	0.0704272	0.617715	-3.51085	8.89851	1.70585e-119	1.93874e-115	no	no
Y19D10B.1	Y19D10B.1	-1.34818	1.02291	0.000972698	0.0183561	0.878247	1.02291	0.0331209	0.353868	-5.37238	1.02291	7.07399e-11	1.91423e-08	no	no
Y19D10B.4	Y19D10B.4	-1.66976	3.75564	8.03766e-12	7.66038e-10	0.978544	3.75564	5.94282e-05	0.0014683	-6.30828	3.75564	9.70827e-44	1.83895e-40	yes	no
Y19D10B.7	pud-1.2	-3.55236	10.0806	3.57544e-125	7.38832e-122	3.75298	10.0806	4.51571e-137	1.02644e-133	1.67391	10.0806	3.04728e-33	3.74412e-30	yes	yes
Y1A5A.1	Y1A5A.1	-1.78157	1.0601	5.22673e-05	0.00145418	2.68546	1.0601	2.19596e-10	1.58713e-08	-0.0535548	1.0601	0.913638	1	yes	no
Y22D7AR.12	Y22D7AR.12	-2.38012	1.04597	1.23806e-07	6.16468e-06	2.61639	1.04597	3.80452e-09	2.24038e-07	0.449733	1.04597	0.374263	1	yes	no
Y23H5A.4	Y23H5A.4	-1.28533	1.58658	0.000704767	0.0139849	1.82189	1.58658	9.39632e-07	3.45884e-05	-0.201154	1.58658	0.622938	1	yes	no
Y25C1A.1	clec-123	-1.42132	4.19901	1.51191e-10	1.21572e-08	1.73643	4.19901	4.54651e-15	5.43918e-13	0.114792	4.19901	0.611348	1	yes	no
Y32F6A.2	snf-10	-1.18396	2.30267	0.000269395	0.00612654	1.20445	2.30267	0.000194297	0.00426506	0.219468	2.30267	0.510822	1	yes	no
Y32F6B.1	Y32F6B.1	-1.43594	5.68069	2.24143e-19	4.19331e-17	1.1856	5.68069	9.41349e-14	9.95225e-12	-0.501143	5.68069	0.00224117	0.138806	yes	no
Y37D8A.8	Y37D8A.8	-1.60212	0.551211	0.000719936	0.01423	1.09955	0.551211	0.0230873	0.26511	0.389748	0.551211	0.442113	1	no	no
Y37E11AL.2	Y37E11AL.2	-1.09764	3.1067	7.05385e-05	0.00189077	1.17461	3.1067	1.94914e-05	0.00053638	0.0475632	3.1067	0.866207	1	yes	no
Y37E11B.10	Y37E11B.10	-1.20196	4.60961	1.69946e-09	1.16253e-07	1.4642	4.60961	1.9344e-13	1.98958e-11	0.228071	4.60961	0.257303	1	yes	no
Y37E3.16	fpn-1.1	-1.71338	4.87348	8.70035e-19	1.54503e-16	1.66315	4.87348	7.40934e-18	1.15751e-15	0.172177	4.87348	0.382834	1	yes	no
Y37F4.5	Y37F4.5	-1.35033	1.92434	0.000118112	0.00296657	1.47194	1.92434	2.3304e-05	0.000629168	0.117728	1.92434	0.748971	1	yes	no
Y38C1AA.7	Y38C1AA.7	-1.28055	6.49287	1.2633e-18	2.23467e-16	1.26491	6.49287	2.91804e-18	4.73776e-16	0.2905	6.49287	0.0449169	1	yes	no
Y38C9B.1	cyp-29A3	-1.49319	1.63517	7.35388e-05	0.00195964	1.46472	1.63517	9.50109e-05	0.00222874	0.312756	1.63517	0.429415	1	yes	no
Y38E10A.17	Y38E10A.17	-1.02862	5.79672	2.91583e-11	2.6275e-09	1.52583	5.79672	6.79807e-23	1.50023e-20	0.216877	5.79672	0.162562	1	yes	no
Y38E10A.7	lips-15	-1.78958	5.0522	1.33021e-20	2.71178e-18	2.04723	5.0522	1.43749e-26	3.84411e-24	2.12093	5.0522	2.08091e-28	2.05653e-25	yes	yes
Y38F1A.1	Y38F1A.1	-1.3394	3.4936	2.73117e-07	1.26052e-05	1.50732	3.4936	6.34567e-09	3.5703e-07	0.33201	3.4936	0.209483	1	yes	no
Y38F1A.6	Y38F1A.6	-1.93838	6.57504	5.19655e-39	2.54022e-36	1.87215	6.57504	1.18802e-36	5.19312e-34	-0.434482	6.57504	0.00380392	0.214133	yes	no
Y38F2AR.10	Y38F2AR.10	-1.26761	1.92723	0.000255367	0.00583965	1.19069	1.92723	0.000583631	0.0114909	0.317672	1.92723	0.37467	1	yes	no
Y38H6C.15	Y38H6C.15	-1.40633	1.21598	0.000568377	0.0116339	1.3259	1.21598	0.00109135	0.0199493	0.442034	1.21598	0.298433	1	yes	no
Y38H8A.2	Y38H8A.2	-1.35408	1.17267	0.000891502	0.0170288	1.69466	1.17267	2.33061e-05	0.000629168	-0.193923	1.17267	0.662758	1	yes	no
Y38H8A.3	Y38H8A.3	-1.40928	4.38347	3.23756e-11	2.90302e-09	1.80265	4.38347	1.98921e-17	2.96497e-15	0.287927	4.38347	0.180568	1	yes	no
Y38H8A.4	Y38H8A.4	-1.45635	3.11378	2.60429e-07	1.20687e-05	1.68989	3.11378	1.92287e-09	1.19095e-07	0.472429	3.11378	0.101059	1	yes	no
Y39A1A.2	Y39A1A.2	-1.37288	1.32305	0.000519046	0.010755	1.37051	1.32305	0.00048691	0.00978144	0.440642	1.32305	0.282726	1	yes	no
Y39B6A.1	Y39B6A.1	-2.29402	6.94336	3.93788e-56	2.71243e-53	2.23145	6.94336	1.96324e-53	1.39455e-50	-0.78199	6.94336	8.31791e-08	1.4829e-05	yes	no
Y39B6A.18	Y39B6A.18	-1.75551	0.468815	0.000346296	0.00762741	1.98794	0.468815	4.13316e-05	0.0010562	0.0373881	0.468815	0.946921	1	yes	no
Y39B6A.25	Y39B6A.25	-1.73798	0.149855	0.00127009	0.0229398	2.33453	0.149855	6.98223e-06	0.000213033	-0.661678	0.149855	0.319396	1	yes	no
Y39B6A.30	Y39B6A.30	-1.38198	3.33103	2.65385e-07	1.22609e-05	1.56226	3.33103	5.26622e-09	3.0001e-07	0.441845	3.33103	0.105116	1	yes	no
Y39E4A.1	Y39E4A.1	-1.94571	0.236512	0.000247009	0.00567421	1.66504	0.236512	0.00187959	0.0322323	0.648048	0.236512	0.262359	1	yes	no
Y39E4B.11	Y39E4B.11	-1.82154	1.18362	1.62536e-05	0.000518531	2.00242	1.18362	1.533e-06	5.40246e-05	0.578671	1.18362	0.196892	1	yes	no
Y39G10AR.25	peel-1	-1.44379	1.27853	0.000374582	0.0081634	1.63322	1.27853	4.72449e-05	0.00119322	0.446395	1.27853	0.294326	1	yes	no
Y39G8C.2	Y39G8C.2	-1.52101	0.435484	0.00122221	0.0222539	1.3171	0.435484	0.00521184	0.0768274	-1.20812	0.435484	0.0387223	1	no	no
Y40H4A.2	Y40H4A.2	-1.11405	2.58019	0.000346205	0.00762741	1.32924	2.58019	1.71935e-05	0.00047865	0.129103	2.58019	0.686302	1	yes	no
Y41C4A.16	col-95	-2.50952	5.01727	2.51927e-40	1.30146e-37	1.51422	5.01727	4.32732e-16	5.70215e-14	0.113073	5.01727	0.551413	1	yes	no
Y41C4A.18	Y41C4A.18	-1.46118	1.42167	0.000211114	0.00494715	1.67892	1.42167	1.61048e-05	0.000451382	0.173008	1.42167	0.6801	1	yes	no
Y41C4A.2	faah-6	-1.47516	0.684453	0.00134434	0.0240913	1.23834	0.684453	0.0077934	0.108746	0.537447	0.684453	0.268802	1	no	no
Y41C4A.7	Y41C4A.7	-1.68288	0.451831	0.000808676	0.0156747	1.63397	0.451831	0.00106109	0.019498	0.578094	0.451831	0.281851	1	yes	no
Y41D4B.27	nhr-146	-1.01712	2.17158	0.0020719	0.0348725	0.579656	2.17158	0.0822237	0.687209	0.178013	2.17158	0.598938	1	no	no
Y41D4B.8	nhr-92	-1.28287	2.06972	0.000175595	0.00419924	0.688665	2.06972	0.0477652	0.463396	0.297368	2.06972	0.400165	1	no	no
Y41E3.18	Y41E3.18	-1.27037	1.47439	0.00100905	0.018979	1.48628	1.47439	9.58493e-05	0.00224493	0.334803	1.47439	0.404341	1	yes	no
Y42A5A.2	lact-8	-1.4654	2.35287	9.24937e-06	0.000311702	1.32469	2.35287	6.11807e-05	0.0015075	0.687629	2.35287	0.0411835	1	yes	no
Y42H9AR.2	Y42H9AR.2	-1.46933	1.6404	7.6009e-05	0.0020148	1.58666	1.6404	1.67768e-05	0.000468195	0.323683	1.6404	0.404948	1	yes	no
Y43C5A.1	nspd-7	-1.40655	4.92606	6.19467e-14	7.37215e-12	1.56519	4.92606	6.37297e-17	9.08219e-15	0.251219	4.92606	0.183987	1	yes	no
Y43C5A.4	Y43C5A.4	-1.50146	2.00753	2.1653e-05	0.000664214	1.81854	2.00753	1.95495e-07	8.3144e-06	0.483326	2.00753	0.186985	1	yes	no
Y43C5B.3	Y43C5B.3	-1.40634	3.78899	9.73552e-09	5.90903e-07	1.46368	3.78899	2.14053e-09	1.31324e-07	0.327088	3.78899	0.188149	1	yes	no
Y43F8A.2	Y43F8A.2	-1.24401	4.80934	7.7557e-11	6.58533e-09	1.44299	4.80934	4.07025e-14	4.43735e-12	0.257943	4.80934	0.181013	1	yes	no
Y43F8C.2	nlp-26	-1.84335	3.23768	5.44363e-11	4.72276e-09	1.91019	3.23768	8.58935e-12	7.58214e-10	1.21427	3.23768	1.65456e-05	0.00196906	yes	yes
Y43F8C.5	Y43F8C.5	-1.26941	3.25906	2.53961e-06	9.71013e-05	1.31516	3.25906	1.01864e-06	3.73154e-05	0.19353	3.25906	0.481956	1	yes	no
Y43F8C.9	Y43F8C.9	-1.06065	2.65928	0.000561088	0.0115003	1.30868	2.65928	1.75018e-05	0.000486337	0.355438	2.65928	0.254743	1	yes	no
Y45F10A.3	Y45F10A.3	-1.07927	2.44155	0.00071359	0.0141169	1.00091	2.44155	0.00167963	0.0292221	0.264821	2.44155	0.416745	1	yes	no
Y45F10B.3	Y45F10B.3	-1.47387	1.30045	0.000184198	0.0043865	1.22987	1.30045	0.00186225	0.0319471	0.153835	1.30045	0.712602	1	yes	no
Y45F10D.6	Y45F10D.6	-1.60028	1.67325	2.90539e-05	0.000860467	1.67862	1.67325	1.01392e-05	0.000296424	1.68549	1.67325	8.75217e-06	0.00108415	yes	yes
Y45F3A.1	Y45F3A.1	-1.21395	2.51439	0.00015345	0.00374852	1.61253	2.51439	3.55783e-07	1.44671e-05	0.332168	2.51439	0.311348	1	yes	no
Y45G12C.2	gst-10	-2.6197	6.49976	2.00523e-65	1.57135e-62	2.26235	6.49976	3.80331e-50	2.43524e-47	0.802686	6.49976	9.14699e-08	1.62434e-05	yes	yes
Y46C8AL.1	clec-73	-1.38053	4.45873	3.1094e-11	2.7936e-09	1.64639	4.45873	2.13601e-15	2.66479e-13	0.214655	4.45873	0.30797	1	yes	no
Y46E12BL.1	tig-3	-1.20567	1.8363	0.0010423	0.0194595	0.748606	1.8363	0.0449971	0.443215	0.857938	1.8363	0.0204654	0.768906	no	no
Y46G5A.14	Y46G5A.14	-1.1263	1.99618	0.00109906	0.0203521	1.34638	1.99618	8.05546e-05	0.00192539	0.208573	1.99618	0.557903	1	yes	no
Y46G5A.22	Y46G5A.22	-2.0931	2.2012	1.85001e-09	1.24413e-07	2.19106	2.2012	2.53002e-10	1.80461e-08	0.604431	2.2012	0.0980886	1	yes	no
Y46G5A.30	snf-5	-1.24962	5.56453	1.36236e-14	1.7204e-12	1.39832	5.56453	6.60364e-18	1.04239e-15	0.0174729	5.56453	0.914971	1	yes	no
Y46H3D.1	Y46H3D.1	-1.60221	0.884738	0.000280008	0.00632675	1.81017	0.884738	3.07625e-05	0.000807911	0.121257	0.884738	0.801006	1	yes	no
Y46H3D.5	nhr-110	-1.01386	2.7606	0.000751168	0.0147403	0.795385	2.7606	0.00838218	0.11593	0.26538	2.7606	0.386399	1	no	no
Y47D3A.10	tbx-34	-1.39831	2.1659	3.75109e-05	0.0010841	1.7146	2.1659	3.18415e-07	1.30881e-05	0.169217	2.1659	0.632967	1	yes	no
Y47D3A.11	wht-8	-1.42794	2.94748	8.33322e-07	3.51752e-05	1.57594	2.94748	4.58604e-08	2.19459e-06	-0.0935449	2.94748	0.756791	1	yes	no
Y47D3A.13	Y47D3A.13	-1.39919	4.11139	6.63344e-10	4.84049e-08	1.64117	4.11139	3.92752e-13	3.99439e-11	0.163224	4.11139	0.478722	1	yes	no
Y47D3A.30	elo-8	-1.4121	2.23599	2.38611e-05	0.000722203	1.82385	2.23599	3.4e-08	1.6656e-06	0.1932	2.23599	0.579208	1	yes	no
Y47D3A.31	Y47D3A.31	-1.57612	3.49823	2.04913e-09	1.36993e-07	1.73707	3.49823	3.34354e-11	2.75364e-09	0.19111	3.49823	0.478602	1	yes	no
Y47D3A.32	Y47D3A.32	-1.48595	1.1279	0.000615039	0.01246	1.62931	1.1279	0.000136394	0.00310341	0.916972	1.1279	0.038475	1	yes	no
Y47D7A.16	rft-1	-1.40095	1.62091	0.000422439	0.00903316	1.68324	1.62091	1.65363e-05	0.000462335	1.24267	1.62091	0.00178627	0.115677	yes	no
Y47D7A.6	Y47D7A.6	-1.98064	2.2778	5.1356e-09	3.26531e-07	1.48292	2.2778	1.35225e-05	0.000384698	0.271913	2.2778	0.448907	1	yes	no
Y47D9A.5	Y47D9A.5	-2.36423	0.0636819	5.84777e-05	0.00160341	2.57729	0.0636819	7.16197e-06	0.000216916	0.706555	0.0636819	0.289002	1	yes	no
Y47G6A.13	Y47G6A.13	-1.06027	2.12362	0.00155325	0.0273056	1.2836	2.12362	0.000109406	0.00253373	0.0599444	2.12362	0.862778	1	yes	no
Y47G6A.26	Y47G6A.26	-1.63022	2.26206	1.45375e-06	5.84857e-05	1.81714	2.26206	6.24967e-08	2.90507e-06	0.432769	2.26206	0.218438	1	yes	no
Y47G6A.33	Y47G6A.33	-1.52975	5.88051	4.00325e-23	9.47874e-21	1.53173	5.88051	2.88647e-23	6.59405e-21	0.198199	5.88051	0.200734	1	yes	no
Y48B6A.5	Y48B6A.5	-1.47342	2.3095	8.00482e-06	0.000273409	1.96403	2.3095	1.7889e-09	1.11864e-07	-0.0667759	2.3095	0.84851	1	yes	no
Y48E1B.10	gst-20	-1.28179	5.0161	2.85924e-12	2.83611e-10	1.44839	5.0161	2.66337e-15	3.2902e-13	0.0478276	5.0161	0.796769	1	yes	no
Y48E1B.8	Y48E1B.8	-1.71084	0.841677	3.27489e-05	0.000959288	0.341831	0.841677	0.432616	1	-2.45368	0.841677	1.7669e-05	0.00207558	no	no
Y48G1C.5	Y48G1C.5	-1.54897	2.66394	4.73267e-07	2.10727e-05	1.55069	2.66394	4.23393e-07	1.69287e-05	0.326967	2.66394	0.301494	1	yes	no
Y49E10.10	Y49E10.10	-1.23779	3.06191	1.00796e-05	0.00033619	1.51859	3.06191	5.10233e-08	2.42379e-06	-0.0560753	3.06191	0.846267	1	yes	no
Y49E10.18	Y49E10.18	-1.5506	3.32035	1.02099e-08	6.15589e-07	1.34406	3.32035	6.70484e-07	2.54644e-05	0.247304	3.32035	0.372578	1	yes	no
Y49F6B.8	Y49F6B.8	-1.72803	1.96668	9.79182e-07	4.0727e-05	1.81829	1.96668	2.13398e-07	9.02444e-06	0.0213576	1.96668	0.955049	1	yes	no
Y49G5A.1	Y49G5A.1	-1.8459	2.63967	1.46391e-09	1.00834e-07	1.24927	2.63967	4.33128e-05	0.00110249	-2.06378	2.63967	2.98258e-08	5.62618e-06	yes	no
Y4C6A.4	Y4C6A.4	-1.36933	0.783262	0.00267912	0.0433898	1.46843	0.783262	0.0011363	0.0206464	0.107017	0.783262	0.828696	1	yes	no
Y4C6B.4	Y4C6B.4	-2.0989	0.821982	9.44016e-06	0.000316956	2.09575	0.821982	8.87873e-06	0.000263745	1.36773	0.821982	0.00528986	0.278336	yes	no
Y4C6B.6	gba-4	-2.99927	4.53458	1.56903e-37	7.13298e-35	3.37577	4.53458	3.38648e-47	1.94877e-44	2.3703	4.53458	5.67564e-24	4.22984e-21	yes	yes
Y50E8A.10	Y50E8A.10	-1.87161	0.753624	7.1404e-05	0.00190947	2.29515	0.753624	6.04907e-07	2.30702e-05	0.371582	0.753624	0.473744	1	yes	no
Y50E8A.9	scrm-7	-2.07242	0.714536	6.44249e-06	0.000223404	1.98852	0.714536	1.47939e-05	0.000417471	-0.196128	0.714536	0.714519	1	yes	no
Y51A2B.4	Y51A2B.4	-1.92269	0.144575	0.000257218	0.00587903	1.82213	0.144575	0.000513721	0.0102413	-0.305586	0.144575	0.624954	1	yes	no
Y51A2D.18	Y51A2D.18	-1.34936	4.6356	1.67574e-11	1.55155e-09	1.29803	4.6356	8.53865e-11	6.57925e-09	0.41597	4.6356	0.0394138	1	yes	no
Y51B9A.3	mpz-6	-1.56591	1.16186	0.000160336	0.00388541	1.83314	1.16186	7.06865e-06	0.000214862	0.216805	1.16186	0.626213	1	yes	no
Y51B9A.5	Y51B9A.5	-1.63575	2.16274	2.12867e-06	8.33517e-05	1.65513	2.16274	1.43024e-06	5.07177e-05	0.790118	2.16274	0.0253127	0.897242	yes	no
Y51H4A.13	Y51H4A.13	-2.28069	1.42474	8.08145e-08	4.12335e-06	2.51517	1.42474	2.00956e-09	1.24126e-07	1.44488	1.42474	0.000983152	0.0689738	yes	no
Y51H4A.7	Y51H4A.7	-1.68336	3.94833	1.22997e-12	1.29135e-10	1.31436	3.94833	2.75492e-08	1.37779e-06	0.23711	3.94833	0.32552	1	yes	no
Y51H4A.935	Y51H4A.935	-1.44855	0.559068	0.0024538	0.0403443	1.30075	0.559068	0.00646995	0.0930499	0.493415	0.559068	0.325861	1	no	no
Y52E8A.4	Y52E8A.4	-3.3315	1.64577	3.80815e-15	4.97478e-13	3.46008	1.64577	2.07821e-16	2.82867e-14	0.843591	1.64577	0.0809233	1	yes	no
Y53C10A.10	Y53C10A.10	-1.71836	3.26627	5.82344e-10	4.29772e-08	1.97604	3.26627	8.83038e-13	8.54124e-11	0.628026	3.26627	0.0261982	0.914042	yes	no
Y53C10A.9	abt-5	-1.27017	2.53726	5.50837e-05	0.00152267	1.50873	2.53726	1.38512e-06	4.93102e-05	-0.139182	2.53726	0.673246	1	yes	no
Y53C12A.7	Y53C12A.7	-1.74231	1.46992	9.6065e-06	0.000321355	1.87541	1.46992	1.5071e-06	5.32122e-05	0.190367	1.46992	0.652197	1	yes	no
Y53F4A.2	Y53F4A.2	-1.503	1.46206	0.000192615	0.0045583	1.80416	1.46206	5.55122e-06	0.00017238	0.741334	1.46206	0.0749693	1	yes	no
Y53F4B.11	Y53F4B.11	-1.89858	2.35213	1.11546e-08	6.67235e-07	2.28015	2.35213	4.7809e-12	4.33821e-10	0.19906	2.35213	0.570999	1	yes	no
Y53F4B.19	Y53F4B.19	-1.33661	3.22137	8.4763e-07	3.57128e-05	1.20718	3.22137	8.36797e-06	0.000250274	0.0490049	3.22137	0.860385	1	yes	no
Y53F4B.28	ptr-20	-1.08692	2.47168	0.000532476	0.0109981	0.793511	2.47168	0.0116798	0.15346	0.0268823	2.47168	0.933735	1	no	no
Y53F4B.31	gst-28	-1.83764	4.21066	6.59422e-16	9.54713e-14	1.50037	4.21066	3.99836e-11	3.24589e-09	1.13831	4.21066	5.78435e-07	9.09905e-05	yes	yes
Y53F4B.32	gst-29	-1.82987	0.889597	0.00132972	0.0238651	1.91651	0.889597	0.000667345	0.0129154	3.24905	0.889597	2.71477e-10	6.81858e-08	yes	yes
Y53F4B.33	gst-39	-1.00626	2.90518	0.000594257	0.0120924	1.02456	2.90518	0.000439174	0.00889323	0.353625	2.90518	0.233667	1	yes	no
Y53F4B.36	Y53F4B.36	-2.35917	0.459584	7.91795e-06	0.000270849	2.55335	0.459584	9.2092e-07	3.39545e-05	0.96163	0.459584	0.0963092	1	yes	no
Y53H1C.3	Y53H1C.3	-1.57446	0.723648	0.000699694	0.0138903	1.62839	0.723648	0.000425492	0.00864207	0.059569	0.723648	0.908164	1	yes	no
Y54E2A.5	Y54E2A.5	-1.80441	1.407	7.29847e-06	0.000251361	1.82486	1.407	5.04385e-06	0.000157594	0.421388	1.407	0.326538	1	yes	no
Y54E2A.7	Y54E2A.7	-1.39015	1.85278	9.3576e-05	0.00241845	1.4667	1.85278	3.32565e-05	0.000865412	0.227294	1.85278	0.541119	1	yes	no
Y54E2A.9	Y54E2A.9	-1.10711	1.74248	0.00223547	0.0371578	1.52987	1.74248	1.70867e-05	0.000475968	-0.552807	1.74248	0.161391	1	yes	no
Y54F10BM.3	Y54F10BM.3	-1.71335	2.68699	4.49388e-08	2.42025e-06	2.01806	2.68699	9.07861e-11	6.94819e-09	0.417783	2.68699	0.197164	1	yes	no
Y54G2A.10	Y54G2A.10	-2.33173	2.50866	1.44258e-11	1.34113e-09	2.35744	2.50866	7.09964e-12	6.32998e-10	1.68382	2.50866	1.40621e-06	0.000203591	yes	yes
Y54G2A.13	Y54G2A.13	-1.18663	3.03159	2.36785e-05	0.000717155	1.08623	3.03159	0.00010703	0.00248249	-0.0314583	3.03159	0.91336	1	yes	no
Y54G2A.15	Y54G2A.15	-1.23989	2.58408	7.73788e-05	0.00204281	1.57128	2.58408	4.46095e-07	1.77272e-05	0.168614	2.58408	0.602378	1	yes	no
Y54G2A.21	Y54G2A.21	-1.19593	2.92936	2.64815e-05	0.000792544	0.521139	2.92936	0.0706282	0.618776	-0.156111	2.92936	0.59651	1	no	no
Y55B1AR.4	Y55B1AR.4	-1.4894	2.36183	5.78135e-06	0.00020233	1.80896	2.36183	2.79099e-08	1.3943e-06	0.352014	2.36183	0.300542	1	yes	no
Y57A10B.7	Y57A10B.7	-1.33395	1.55495	0.000625016	0.0126172	1.72424	1.55495	6.33503e-06	0.000194724	0.507675	1.55495	0.207284	1	yes	no
Y57E12AL.3	Y57E12AL.3	-2.03976	4.28185	1.59543e-20	3.23793e-18	0.610189	4.28185	0.00569338	0.0831973	0.567016	4.28185	0.0102113	0.464215	no	no
Y57G11A.2	Y57G11A.2	-1.80119	6.34337	2.71828e-33	1.04725e-30	2.10527	6.34337	2.01466e-44	1.10347e-41	0.185443	6.34337	0.214373	1	yes	no
Y57G11B.7	irld-18	-1.20459	2.30973	0.000235199	0.005438	1.17503	2.30973	0.000320655	0.00672694	0.464284	2.30973	0.164401	1	yes	no
Y57G11C.14	Y57G11C.14	-1.43754	2.20805	1.95955e-05	0.000609742	1.65825	2.20805	6.92776e-07	2.62452e-05	0.271578	2.20805	0.438579	1	yes	no
Y57G11C.23	Y57G11C.23	-1.19735	2.40236	0.000179744	0.00428716	1.30515	2.40236	4.09686e-05	0.00104751	0.0905077	2.40236	0.784598	1	yes	no
Y57G11C.31	Y57G11C.31	-1.13671	2.65518	0.000207596	0.00487665	1.02126	2.65518	0.000832076	0.0157247	0.285586	2.65518	0.359638	1	yes	no
Y57G11C.40	Y57G11C.40	-2.21124	1.93836	9.53983e-08	4.82951e-06	2.56147	1.93836	3.00306e-10	2.11662e-08	2.80761	1.93836	3.11581e-12	9.76882e-10	yes	yes
Y57G11C.41	Y57G11C.41	-2.4025	0.351297	0.00011416	0.00287286	2.77804	0.351297	4.39295e-06	0.000138721	2.70893	0.351297	8.00423e-06	0.000996932	yes	yes
Y57G11C.5	Y57G11C.5	-1.21911	3.41387	3.56326e-06	0.000131913	1.36787	3.41387	1.75931e-07	7.52397e-06	0.275225	3.41387	0.303026	1	yes	no
Y57G11C.52	Y57G11C.52	-1.65142	0.758968	0.000221204	0.00515171	1.8393	0.758968	3.20982e-05	0.000838553	-0.922316	0.758968	0.0902555	1	yes	no
Y57G11C.6	Y57G11C.6	-1.48799	2.22541	1.10871e-05	0.000367368	1.87964	2.22541	2.09121e-08	1.07059e-06	0.282285	2.22541	0.425272	1	yes	no
Y57G7A.5	Y57G7A.5	-1.59374	2.70307	2.78862e-07	1.28443e-05	1.75651	2.70307	1.24974e-08	6.69194e-07	0.488807	2.70307	0.124671	1	yes	no
Y57G7A.6	Y57G7A.6	-1.49665	4.37486	1.51937e-12	1.5487e-10	1.52399	4.37486	5.40013e-13	5.40738e-11	-0.0386618	4.37486	0.858004	1	yes	no
Y59E9AL.2	Y59E9AL.2	-1.1653	6.29965	2.68722e-15	3.56162e-13	1.15919	6.29965	3.40953e-15	4.16668e-13	0.251684	6.29965	0.0875131	1	yes	no
Y59E9AL.3	Y59E9AL.3	-1.11529	6.42834	1.62338e-14	2.03868e-12	1.03626	6.42834	8.80726e-13	8.53703e-11	0.159188	6.42834	0.272607	1	yes	no
Y59E9AL.6	Y59E9AL.6	-1.27154	5.54627	6.56393e-15	8.45333e-13	1.35758	5.54627	8.06417e-17	1.135e-14	0.262679	5.54627	0.108595	1	yes	no
Y59E9AR.8	Y59E9AR.8	-1.62189	1.54054	2.40279e-05	0.000726769	1.63951	1.54054	1.78454e-05	0.000494986	0.441222	1.54054	0.273616	1	yes	no
Y59H11AM.2	mpst-5	-1.01712	3.85665	2.08629e-05	0.000643453	1.3943	3.85665	4.64365e-09	2.68924e-07	-0.110146	3.85665	0.652069	1	yes	no
Y59H11AM.3	mpst-6	-1.01712	3.85665	2.08629e-05	0.000643453	1.3943	3.85665	4.64365e-09	2.68924e-07	-0.110146	3.85665	0.652069	1	yes	no
Y59H11AM.4	Y59H11AM.4	-1.70053	1.09221	5.44768e-05	0.00150826	1.58075	1.09221	0.000170286	0.00379479	0.47573	1.09221	0.286091	1	yes	no
Y62F5A.10	Y62F5A.10	-1.61974	1.11276	0.000115875	0.0029136	1.84566	1.11276	8.02164e-06	0.000240769	0.102209	1.11276	0.822553	1	yes	no
Y65B4A.9	Y65B4A.9	-1.30847	2.56575	2.82154e-05	0.000837819	1.19072	2.56575	0.000135254	0.00308365	0.262386	2.56575	0.413268	1	yes	no
Y65B4BR.1	Y65B4BR.1	-1.66131	0.0909201	0.00138345	0.0247124	0.578154	0.0909201	0.298656	1	0.0298788	0.0909201	0.958691	1	no	no
Y66A7A.9	Y66A7A.9	-1.89779	0.947459	1.24036e-05	0.000406255	1.54667	0.947459	0.000404816	0.00828256	0.581441	0.947459	0.208071	1	yes	no
Y66D12A.11	Y66D12A.11	-1.27999	2.14609	0.000128975	0.00320852	1.41613	2.14609	2.05914e-05	0.000564259	0.129229	2.14609	0.710475	1	yes	no
Y66D12A.13	Y66D12A.13	-1.48121	3.31136	6.73642e-08	3.50394e-06	1.32376	3.31136	1.34912e-06	4.82931e-05	0.393886	3.31136	0.159784	1	yes	no
Y66D12A.3	Y66D12A.3	-1.46213	1.61259	0.000104473	0.00266374	1.77354	1.61259	1.8795e-06	6.46323e-05	-0.0540068	1.61259	0.89411	1	yes	no
Y67A10A.3	Y67A10A.3	-1.76654	1.7981	1.19041e-06	4.87984e-05	1.67251	1.7981	4.14169e-06	0.000131576	-0.275754	1.7981	0.492439	1	yes	no
Y67A6A.1	Y67A6A.1	-1.82507	2.43772	2.31673e-08	1.31487e-06	1.7881	2.43772	3.95449e-08	1.91658e-06	0.431749	2.43772	0.203185	1	yes	no
Y69A2AR.14	Y69A2AR.14	-1.84856	1.1799	5.30464e-06	0.00018739	1.67584	1.1799	3.66356e-05	0.000945227	0.0753958	1.1799	0.865454	1	yes	no
Y69A2AR.19	Y69A2AR.19	-1.54674	4.84669	4.94128e-16	7.24631e-14	1.69263	4.84669	6.28384e-19	1.07395e-16	0.0458725	4.84669	0.812604	1	yes	no
Y69A2AR.23	Y69A2AR.23	-1.744	0.657913	0.000232047	0.00537944	2.25006	0.657913	1.04523e-06	3.82585e-05	-0.0510446	0.657913	0.924211	1	yes	no
Y69A2AR.4	smf-3	-3.66205	2.65267	1.10885e-19	2.11803e-17	0.682814	2.65267	0.173577	1	0.972561	2.65267	0.043627	1	no	no
Y69A2AR.5	daao-1	-1.253	2.3846	8.82235e-05	0.00229447	0.543891	2.3846	0.0962187	0.763918	-1.56353	2.3846	3.28025e-05	0.00360163	no	no
Y69A2AR.9	Y69A2AR.9	-2.44582	1.64588	9.89594e-10	7.04036e-08	2.60682	1.64588	4.74392e-11	3.79689e-09	0.225969	1.64588	0.616125	1	yes	no
Y69E1A.1	Y69E1A.1	-1.4441	5.76192	4.2014e-20	8.30434e-18	1.83213	5.76192	3.43407e-31	1.16505e-28	0.250353	5.76192	0.112937	1	yes	no
Y69E1A.2	Y69E1A.2	-1.59815	6.62834	3.42931e-28	1.04631e-25	1.50555	6.62834	2.51142e-25	6.41414e-23	0.309423	6.62834	0.031758	1	yes	no
Y69E1A.3	Y69E1A.3	-1.42283	1.32052	0.000515187	0.0106896	1.80715	1.32052	6.53621e-06	0.000200636	0.708743	1.32052	0.0920896	1	yes	no
Y69E1A.4	Y69E1A.4	-1.79006	0.78146	7.63269e-05	0.00201973	1.97651	0.78146	9.30651e-06	0.000275087	-0.321209	0.78146	0.53783	1	yes	no
Y69E1A.8	Y69E1A.8	-2.12464	1.40912	3.41122e-07	1.55233e-05	2.65292	1.40912	8.15912e-11	6.31894e-09	0.400693	1.40912	0.382223	1	yes	no
Y69F12A.1	Y69F12A.1	-2.09216	1.02463	5.53484e-06	0.000194601	2.62959	1.02463	4.67769e-09	2.70207e-07	0.793694	1.02463	0.111624	1	yes	no
Y69F12A.2	alh-12	-1.01461	6.6867	1.33899e-12	1.3866e-10	1.09674	6.6867	1.70339e-14	1.91204e-12	0.494259	6.6867	0.000531897	0.0411234	yes	yes
Y69H2.6	ubc-19	-1.05818	1.85089	0.0029434	0.0469179	0.81714	1.85089	0.0223436	0.25807	0.387791	1.85089	0.286602	1	no	no
Y69H2.9	Y69H2.9	-2.82858	2.29504	2.28046e-15	3.04023e-13	2.67438	2.29504	6.75317e-14	7.27502e-12	0.586919	2.29504	0.1307	1	yes	no
Y6E2A.10	Y6E2A.10	-1.71139	1.78039	2.90868e-06	0.000109827	1.6601	1.78039	5.38207e-06	0.00016747	0.302017	1.78039	0.435345	1	yes	no
Y6E2A.9	sfxn-1.3	-1.94977	0.695788	5.51158e-05	0.00152267	2.26387	0.695788	1.68195e-06	5.84582e-05	0.972414	0.695788	0.0562015	1	yes	no
Y71F9AL.2	Y71F9AL.2	-1.20744	2.82367	4.54275e-05	0.00128352	1.47163	2.82367	5.56243e-07	2.15029e-05	0.0923079	2.82367	0.761638	1	yes	no
Y71F9AL.4	Y71F9AL.4	-1.71911	4.05407	3.85401e-13	4.20161e-11	1.91214	4.05407	5.57441e-16	7.26127e-14	1.08429	4.05407	4.96411e-06	0.000641118	yes	yes
Y71F9B.14	Y71F9B.14	-1.59418	0.773269	0.000494584	0.0103281	2.08081	0.773269	3.11255e-06	0.000102314	0.0096408	0.773269	0.985247	1	yes	no
Y71F9B.9	Y71F9B.9	-2.25082	1.96415	5.85205e-10	4.31183e-08	2.09575	1.96415	8.59802e-09	4.73214e-07	0.578199	1.96415	0.134946	1	yes	no
Y71G12A.4	Y71G12A.4	-1.33027	2.10473	8.78428e-05	0.00228807	1.26189	2.10473	0.000193168	0.00424438	0.435999	2.10473	0.210855	1	yes	no
Y71G12B.17	Y71G12B.17	-1.15248	2.16499	0.000449533	0.00949639	1.0976	2.16499	0.00080239	0.0152817	0.0167387	2.16499	0.960814	1	yes	no
Y71G12B.22	Y71G12B.22	-1.17748	2.67462	0.000103774	0.00264888	1.14916	2.67462	0.000145836	0.00329188	0.291831	2.67462	0.345385	1	yes	no
Y71G12B.27	Y71G12B.27	-1.08501	3.03913	0.000108297	0.0027443	0.989379	3.03913	0.000403831	0.00826963	0.11394	3.03913	0.690253	1	yes	no
Y71G12B.3	Y71G12B.3	-1.24878	1.80709	0.000513038	0.0106547	1.40367	1.80709	8.19447e-05	0.00195553	0.330332	1.80709	0.374375	1	yes	no
Y71G12B.30	Y71G12B.30	-1.3505	2.66972	1.14255e-05	0.000376933	1.54606	2.66972	4.13937e-07	1.65797e-05	0.0868494	2.66972	0.784825	1	yes	no
Y73B3A.17	Y73B3A.17	-1.44516	0.527075	0.00310898	0.0491437	0.184873	0.527075	0.730702	1	1.02841	0.527075	0.0380009	1	no	no
Y73B6BL.24	acp-6	-1.50985	9.05153	5.31567e-28	1.60037e-25	1.33861	9.05153	1.55031e-22	3.32447e-20	0.382918	9.05153	0.00463668	0.253351	yes	no
Y73B6BL.34	bli-6	-1.12168	4.00448	9.1858e-07	3.85592e-05	1.10104	4.00448	1.35957e-06	4.85908e-05	0.632775	4.00448	0.00565701	0.29125	yes	no
Y73B6BL.7	csp-2	-1.45046	1.07591	0.000416827	0.00892996	1.27014	1.07591	0.00206446	0.0349544	0.376768	1.07591	0.383838	1	yes	no
Y73F4A.1	Y73F4A.1	-1.3305	1.03577	0.00224447	0.0372665	0.599184	1.03577	0.185997	1	1.13577	1.03577	0.00924248	0.429185	no	no
Y73F8A.12	Y73F8A.12	-1.43621	1.08174	0.00064123	0.0128987	1.50918	1.08174	0.000298189	0.00628465	0.484276	1.08174	0.270946	1	yes	no
Y73F8A.14	Y73F8A.14	-1.15295	1.67534	0.00176455	0.0303397	1.3984	1.67534	0.000120947	0.00277835	0.131351	1.67534	0.732463	1	yes	no
Y73F8A.15	Y73F8A.15	-1.35479	0.900933	0.00194172	0.0329253	1.59408	0.900933	0.000205488	0.00448688	0.424104	0.900933	0.354473	1	yes	no
Y73F8A.20	Y73F8A.20	-1.20301	2.44764	0.000138617	0.00342111	1.26269	2.44764	5.88213e-05	0.00145567	-0.253117	2.44764	0.445749	1	yes	no
Y75B7B.1	Y75B7B.1	-1.31438	1.59347	0.000380073	0.0082475	1.06385	1.59347	0.00417596	0.064028	0.24795	1.59347	0.519498	1	no	no
Y75B8A.23	Y75B8A.23	-1.31496	2.35622	6.15881e-05	0.00167857	1.61395	2.35622	6.57201e-07	2.50226e-05	0.310886	2.35622	0.356879	1	yes	no
Y76A2A.1	tag-164	-1.43158	3.15486	2.82207e-07	1.2959e-05	1.47827	3.15486	1.03667e-07	4.58444e-06	0.421569	3.15486	0.137471	1	yes	no
Y76B12C.4	Y76B12C.4	-1.19252	2.23194	0.000327947	0.00726446	1.37831	2.23194	2.82177e-05	0.000745385	0.37117	2.23194	0.274511	1	yes	no
Y77E11A.10	clp-6	-1.08399	3.61246	1.67442e-05	0.000531943	1.04681	3.61246	3.07903e-05	0.000808174	0.109351	3.61246	0.669348	1	yes	no
Y80D3A.8	Y80D3A.8	-1.73996	0.333063	0.0011843	0.0217007	2.23066	0.333063	1.84879e-05	0.00051062	0.983119	0.333063	0.0811029	1	yes	no
Y81G3A.1	Y81G3A.1	-1.45277	1.42774	0.000108993	0.00275733	1.03444	1.42774	0.006095	0.0882562	-0.704155	1.42774	0.0927725	1	no	no
Y87G2A.20	Y87G2A.20	-1.39407	1.77158	0.00011051	0.00278642	1.10994	1.77158	0.00218745	0.0366545	0.317315	1.77158	0.396857	1	yes	no
Y8A9A.2	Y8A9A.2	-1.12004	2.38109	0.00049042	0.01026	0.74097	2.38109	0.0222395	0.256998	0.572551	2.38109	0.0783175	1	no	no
Y95B8A.4	Y95B8A.4	-1.24397	1.67887	0.000787033	0.0153099	1.43418	1.67887	9.15858e-05	0.00216066	0.310976	1.67887	0.418285	1	yes	no
ZC116.2	cyc-2.2	-1.46259	4.32082	1.2522e-11	1.17616e-09	1.47168	4.32082	8.28081e-12	7.32401e-10	0.457862	4.32082	0.0353848	1	yes	no
ZC168.6	ssp-34	-1.2319	4.84089	9.26941e-11	7.68972e-09	1.46503	4.84089	1.19725e-14	1.37792e-12	0.345213	4.84089	0.0710964	1	yes	no
ZC250.5	ZC250.5	-1.31096	1.66774	0.000416558	0.0089284	1.42144	1.66774	0.00011403	0.00263009	0.505094	1.66774	0.18628	1	yes	no
ZC317.6	ZC317.6	-1.48859	3.8008	1.42583e-09	9.83605e-08	1.24433	3.8008	4.0163e-07	1.61294e-05	0.717454	3.8008	0.00372279	0.210238	yes	no
ZC373.7	col-176	-1.66207	0.698535	0.000389302	0.00842363	1.29872	0.698535	0.00637701	0.0918585	0.872268	0.698535	0.0736573	1	no	no
ZC374.2	ZC374.2	-1.17542	2.49291	0.000261614	0.00596357	1.29664	2.49291	5.0289e-05	0.0012603	0.027528	2.49291	0.934504	1	yes	no
ZC376.2	ZC376.2	-1.08938	5.59554	1.93325e-11	1.75775e-09	1.08817	5.59554	1.88944e-11	1.62374e-09	0.46478	5.59554	0.00427886	0.238092	yes	no
ZC376.3	ZC376.3	-2.25898	3.99493	4.67597e-20	9.20235e-18	1.99626	3.99493	4.67985e-16	6.13114e-14	1.34241	3.99493	5.78766e-08	1.06094e-05	yes	yes
ZC376.8	ZC376.8	-1.31565	2.25432	7.47276e-05	0.0019855	1.77571	2.25432	6.1815e-08	2.87633e-06	0.232337	2.25432	0.499541	1	yes	no
ZC404.2	ZC404.2	-1.55276	0.943655	0.000312834	0.00697487	1.35521	0.943655	0.00168815	0.029348	0.316782	0.943655	0.490771	1	yes	no
ZC412.10	ZC412.10	-1.11641	2.71276	0.00025027	0.00574042	1.12474	2.71276	0.000209561	0.00456049	0.540695	2.71276	0.0790439	1	yes	no
ZC412.5	ZC412.5	-1.86152	0.991143	1.7164e-05	0.000544136	1.89434	0.991143	1.02137e-05	0.000298216	0.03216	0.991143	0.946647	1	yes	no
ZC455.5	ugt-4	-1.15653	4.30166	5.69811e-08	3.01211e-06	0.713096	4.30166	0.000836847	0.0157793	0.267773	4.30166	0.212847	1	yes	no
ZC477.10	ZC477.10	-1.45794	0.663244	0.00193618	0.0328435	1.92272	0.663244	2.70306e-05	0.000717778	-0.0720417	0.663244	0.890613	1	yes	no
ZC477.2	ZC477.2	-1.4677	1.66241	0.00010699	0.00271597	1.96438	1.66241	1.30807e-07	5.69054e-06	0.511278	1.66241	0.194043	1	yes	no
ZC477.7	ZC477.7	-1.29824	4.11332	8.46456e-09	5.21419e-07	1.47969	4.11332	4.64793e-11	3.72663e-09	0.18804	4.11332	0.410852	1	yes	no
ZC513.3	ZC513.3	-1.79884	0.675659	0.000118989	0.00298529	1.74173	0.675659	0.000183656	0.00406918	0.747318	0.675659	0.131239	1	yes	no
ZC581.2	ZC581.2	-1.23044	2.06602	0.000358988	0.00786883	1.58108	2.06602	3.36509e-06	0.000109576	0.418383	2.06602	0.236926	1	yes	no
ZC581.6	try-7	-2.01574	1.66896	1.56368e-07	7.66017e-06	2.03669	1.66896	9.70344e-08	4.32055e-06	0.826643	1.66896	0.0396029	1	yes	no
ZC581.7	ZC581.7	-1.83728	2.38808	3.05235e-08	1.69017e-06	1.98304	2.38808	1.81845e-09	1.1309e-07	0.684504	2.38808	0.0452508	1	yes	no
ZK1010.5	ZK1010.5	-1.10878	4.28845	2.56081e-07	1.19099e-05	1.50764	4.28845	2.09468e-12	1.95136e-10	0.0125627	4.28845	0.954171	1	yes	no
ZK1010.9	snf-7	-1.57197	0.325802	0.00303818	0.048209	2.2003	0.325802	1.57398e-05	0.000442241	1.04107	0.325802	0.0563026	1	yes	no
ZK105.6	ZK105.6	-1.93106	0.227154	0.000185359	0.00440722	1.91227	0.227154	0.000190991	0.00420468	0.000688742	0.227154	0.998973	1	yes	no
ZK1053.2	ZK1053.2	-1.39928	3.48057	8.18675e-08	4.1724e-06	1.53227	3.48057	3.85959e-09	2.26694e-07	0.353945	3.48057	0.181958	1	yes	no
ZK1053.6	ZK1053.6	-1.39081	0.730892	0.00237368	0.039183	1.89231	0.730892	2.15553e-05	0.000587485	0.112424	0.730892	0.820878	1	yes	no
ZK1098.6	ZK1098.6	-1.31107	1.6668	0.000379511	0.00823924	1.30348	1.6668	0.000375518	0.00773905	0.359891	1.6668	0.344823	1	yes	no
ZK1098.9	ZK1098.9	-2.25776	0.628928	4.0233e-06	0.000146323	2.21316	0.628928	5.94669e-06	0.000183781	0.628729	0.628928	0.247305	1	yes	no
ZK1127.2	acs-6	-1.3309	3.5559	2.15002e-07	1.02455e-05	1.46011	3.5559	1.14387e-08	6.18331e-07	0.128941	3.5559	0.622803	1	yes	no
ZK1128.3	ZK1128.3	-1.40029	2.27489	1.85528e-05	0.000579278	1.38985	2.27489	1.97685e-05	0.000543676	0.158859	2.27489	0.639854	1	yes	no
ZK1225.4	ZK1225.4	-1.49535	3.03742	1.27948e-07	6.35004e-06	1.55428	3.03742	3.71666e-08	1.81096e-06	-0.0560455	3.03742	0.848963	1	yes	no
ZK1225.6	ssp-31	-1.60354	3.65462	3.75643e-10	2.83203e-08	1.80321	3.65462	1.63901e-12	1.54588e-10	0.45722	3.65462	0.0785435	1	yes	no
ZK1248.5	ZK1248.5	-1.5525	2.82717	2.07098e-07	9.94179e-06	1.69588	2.82717	1.18229e-08	6.3758e-07	0.187263	2.82717	0.544719	1	yes	no
ZK1248.6	msp-64	-1.39281	6.22704	8.21229e-21	1.69699e-18	1.45089	6.22704	1.79834e-22	3.80253e-20	0.150668	6.22704	0.311302	1	yes	no
ZK1251.1	htas-1	-1.24177	3.7141	6.17642e-07	2.67416e-05	1.45546	3.7141	4.47089e-09	2.60245e-07	0.270511	3.7141	0.284286	1	yes	no
ZK1251.5	ZK1251.5	-3.64624	0.238184	3.75422e-08	2.04396e-06	4.48531	0.238184	7.80742e-13	7.64912e-11	-0.0103029	0.238184	0.991068	1	yes	no
ZK1251.6	msp-76	-1.28485	6.78978	1.79313e-19	3.36849e-17	1.34058	6.78978	4.56065e-21	9.01442e-19	0.350726	6.78978	0.0132795	0.560019	yes	no
ZK1290.6	rnh-1.1	-1.09083	2.99569	0.00013453	0.00332916	1.63482	2.99569	7.86329e-09	4.37544e-07	0.0773809	2.99569	0.791526	1	yes	no
ZK1307.3	ZK1307.3	-1.21728	1.79383	0.000847619	0.0162933	1.088	1.79383	0.0028303	0.0456918	0.818964	1.79383	0.0258036	0.907238	yes	no
ZK1307.4	ZK1307.4	-1.17766	3.85027	8.28759e-07	3.50416e-05	1.19411	3.85027	5.40448e-07	2.09636e-05	0.342673	3.85027	0.15517	1	yes	no
ZK228.3	ZK228.3	-1.85565	3.88769	5.89277e-14	7.04977e-12	2.17087	3.88769	1.33463e-18	2.23888e-16	0.513897	3.88769	0.0413929	1	yes	no
ZK228.4	ZK228.4	-1.34727	4.28212	1.08465e-09	7.65668e-08	2.18074	4.28212	5.53389e-23	1.23322e-20	-0.173733	4.28212	0.448299	1	yes	no
ZK265.3	ZK265.3	-1.42238	5.18283	1.08441e-15	1.503e-13	1.5249	5.18283	7.5914e-18	1.18189e-15	0.353923	5.18283	0.0470856	1	yes	no
ZK353.4	ZK353.4	-1.69212	1.03508	0.000109824	0.00277064	2.15108	1.03508	4.79321e-07	1.88011e-05	0.412421	1.03508	0.380885	1	yes	no
ZK354.11	msp-59	-1.3477	7.22919	6.70383e-22	1.49394e-19	1.41646	7.22919	5.2777e-24	1.28994e-21	0.473695	7.22919	0.000651572	0.0490416	yes	yes
ZK354.2	ZK354.2	-1.44082	4.15972	1.34956e-10	1.08974e-08	1.60703	4.15972	6.98604e-13	6.93433e-11	0.321293	4.15972	0.157156	1	yes	no
ZK354.3	ZK354.3	-1.21453	3.28499	5.90879e-06	0.000206313	1.17468	3.28499	1.11846e-05	0.000324178	0.315842	3.28499	0.245544	1	yes	no
ZK354.4	msp-113	-1.39588	6.92506	5.8874e-23	1.37962e-20	1.4683	6.92506	3.23179e-25	8.20784e-23	0.529045	6.92506	0.00016477	0.0150414	yes	yes
ZK354.5	msp-51	-1.03452	7.14468	1.13808e-13	1.32323e-11	1.19953	7.14468	8.18593e-18	1.26578e-15	0.183801	7.14468	0.185653	1	yes	no
ZK354.6	ZK354.6	-1.654	2.79628	3.74004e-08	2.03868e-06	1.60022	2.79628	9.36851e-08	4.19608e-06	0.191114	2.79628	0.539255	1	yes	no
ZK354.7	ZK354.7	-1.43573	2.82022	1.8512e-06	7.33719e-05	1.46841	2.82022	9.81757e-07	3.59933e-05	0.688835	2.82022	0.0239352	0.86519	yes	no
ZK354.8	ZK354.8	-1.29863	3.08504	3.71937e-06	0.00013647	1.63493	3.08504	4.6221e-09	2.68359e-07	-0.0546564	3.08504	0.850674	1	yes	no
ZK39.10	ZK39.10	-1.64255	0.376224	0.00152842	0.0269594	1.81644	0.376224	0.000376113	0.00774387	0.702826	0.376224	0.202463	1	yes	no
ZK39.6	clec-97	-1.68854	2.51456	5.07627e-07	2.24705e-05	1.61805	2.51456	1.40722e-06	5.00186e-05	1.61822	2.51456	1.33305e-06	0.000194862	yes	yes
ZK418.2	ZK418.2	-1.82318	2.25235	5.81371e-08	3.06254e-06	1.98831	2.25235	2.71399e-09	1.6407e-07	-0.089345	2.25235	0.805116	1	yes	no
ZK484.5	ZK484.5	-1.36489	6.57625	5.04042e-21	1.05596e-18	1.59957	6.57625	3.87658e-28	1.13699e-25	0.272505	6.57625	0.0593873	1	yes	no
ZK484.7	ZK484.7	-1.70008	2.25264	4.83247e-07	2.1496e-05	1.88638	2.25264	1.82634e-08	9.47802e-07	0.460332	2.25264	0.18951	1	yes	no
ZK484.8	nspd-1	-1.31345	5.80742	2.8381e-17	4.44906e-15	1.54075	5.80742	3.50196e-23	7.88132e-21	0.374342	5.80742	0.0161587	0.650654	yes	no
ZK507.1	ZK507.1	-1.5014	1.605	6.40227e-05	0.00173453	1.70579	1.605	4.64371e-06	0.000145894	0.175216	1.605	0.660245	1	yes	no
ZK507.3	ZK507.3	-1.18639	1.94651	0.000610667	0.012388	1.25979	1.94651	0.000242655	0.00521823	0.052783	1.94651	0.883488	1	yes	no
ZK512.10	ZK512.10	-1.16045	2.33086	0.000373705	0.00815212	1.39057	2.33086	1.64867e-05	0.000461231	0.214666	2.33086	0.522012	1	yes	no
ZK512.8	ZK512.8	-1.28719	3.87591	7.45997e-08	3.83741e-06	1.48754	3.87591	4.49921e-10	3.08505e-08	0.452205	3.87591	0.0609395	1	yes	no
ZK520.5	cyn-2	-1.50429	5.32716	3.13008e-18	5.30958e-16	1.39362	5.32716	6.12256e-16	7.92985e-14	0.57533	5.32716	0.000871295	0.0626137	yes	no
ZK524.1	spe-4	-1.34339	2.87555	4.8321e-06	0.000172292	1.67632	2.87555	9.38878e-09	5.13009e-07	-0.162187	2.87555	0.59776	1	yes	no
ZK546.4	ZK546.4	-1.55847	2.00889	7.01489e-06	0.000242144	1.64632	2.00889	1.72057e-06	5.95726e-05	0.196437	2.00889	0.588093	1	yes	no
ZK546.6	msp-152	-1.42512	6.70405	3.56199e-23	8.47811e-21	1.40086	6.70405	1.67713e-22	3.56279e-20	0.399243	6.70405	0.00517843	0.274699	yes	no
ZK546.7	ZK546.7	-1.1944	3.60553	1.88067e-06	7.44099e-05	1.0011	3.60553	6.30274e-05	0.00154546	-0.0138009	3.60553	0.956922	1	yes	no
ZK550.5	ZK550.5	-1.34208	4.53047	5.09583e-11	4.44648e-09	1.35312	4.53047	3.20802e-11	2.66131e-09	0.177354	4.53047	0.391529	1	yes	no
ZK593.1	pyk-2	-1.01201	5.57696	4.35865e-10	3.26978e-08	0.864845	5.57696	9.10131e-08	4.09658e-06	0.560332	5.57696	0.000547311	0.0419329	yes	yes
ZK596.2	ZK596.2	-1.50014	2.9997	2.06695e-07	9.93295e-06	1.65862	2.9997	7.99289e-09	4.43071e-07	0.412589	2.9997	0.162301	1	yes	no
ZK6.8	ZK6.8	-1.6369	3.82073	1.1767e-10	9.60397e-09	1.95328	3.82073	1.21798e-14	1.39825e-12	1.77552	3.82073	2.21315e-12	7.08536e-10	yes	yes
ZK616.1	ZK616.1	-2.43647	0.490529	1.46891e-05	0.000472265	2.25	0.490529	6.68385e-05	0.001631	1.70532	0.490529	0.00356729	0.203479	yes	no
ZK616.61	ZK616.61	-1.35042	2.08494	9.19466e-05	0.0023804	1.80265	2.08494	1.18915e-07	5.20308e-06	0.401274	2.08494	0.259632	1	yes	no
ZK616.7	ZK616.7	-1.47229	0.854878	0.00094825	0.0179543	1.75651	0.854878	5.79119e-05	0.00143551	0.345689	0.854878	0.465996	1	yes	no
ZK616.8	ZK616.8	-1.36899	1.74985	0.000201165	0.00474581	1.73369	1.74985	1.84154e-06	6.3471e-05	0.413925	1.74985	0.279574	1	yes	no
ZK622.1	ZK622.1	-1.2643	2.2644	0.000107553	0.0027285	1.12179	2.2644	0.00057574	0.011365	0.179914	2.2644	0.593266	1	yes	no
ZK637.12	ZK637.12	-1.05912	3.40914	4.79747e-05	0.00134962	1.08327	3.40914	3.02409e-05	0.000795131	0.138954	3.40914	0.599437	1	yes	no
ZK669.2	ZK669.2	-1.29947	1.29869	0.00150597	0.0266289	0.954178	1.29869	0.0211819	0.247545	1.20789	1.29869	0.00306431	0.179288	no	no
ZK673.6	ZK673.6	-1.32897	0.705788	0.00295633	0.047091	1.23101	0.705788	0.00580472	0.0846609	0.390193	0.705788	0.405425	1	no	no
ZK688.10	ZK688.10	-1.82642	2.84309	1.17554e-09	8.24714e-08	1.89197	2.84309	2.54271e-10	1.80899e-08	0.352762	2.84309	0.255703	1	yes	no
ZK688.12	ZK688.12	-1.53072	1.2622	0.000130112	0.00323225	0.997327	1.2622	0.0142572	0.180141	0.335222	1.2622	0.427735	1	no	no
ZK742.3	ZK742.3	-2.2599	3.3985	2.59277e-15	3.44649e-13	1.9284	3.3985	1.57825e-11	1.36665e-09	1.94093	3.3985	1.10494e-11	3.28312e-09	yes	yes
ZK757.3	alg-4	-1.18517	4.79809	6.17403e-10	4.53437e-08	1.54783	4.79809	5.96885e-16	7.75285e-14	0.0720765	4.79809	0.710238	1	yes	no
ZK795.2	ZK795.2	-1.43336	3.54553	3.61305e-08	1.98373e-06	1.65357	3.54553	1.7629e-10	1.28848e-08	0.533498	3.54553	0.0425819	1	yes	no
ZK809.1	ZK809.1	-1.42327	2.09103	3.01152e-05	0.000886701	1.54234	2.09103	5.33582e-06	0.000166145	0.481111	2.09103	0.170384	1	yes	no
ZK816.5	dhs-26	-6.45382	3.80659	6.24085e-81	6.30479e-78	5.19396	3.80659	2.04827e-52	1.36936e-49	1.5059	3.80659	0.000359532	0.0295031	yes	yes
ZK829.2	hdl-1	-1.24784	2.58107	5.82833e-05	0.00159936	1.42528	2.58107	3.89577e-06	0.000124372	-0.120382	2.58107	0.71012	1	yes	no
ZK84.2	ZK84.2	-1.40102	2.89704	1.91443e-06	7.56798e-05	1.57027	2.89704	8.09658e-08	3.6552e-06	0.392079	2.89704	0.191845	1	yes	no
ZK84.5	ZK84.5	-1.0596	2.04584	0.00173906	0.029958	1.10068	2.04584	0.00105476	0.0193975	0.085707	2.04584	0.806025	1	yes	no
ZK849.1	ZK849.1	-1.92202	0.28838	0.000492093	0.0102903	2.71303	0.28838	2.15554e-07	9.0987e-06	0.0267021	0.28838	0.967195	1	yes	no
ZK849.4	best-25	-1.78453	0.239442	0.000883373	0.0168948	2.07988	0.239442	6.9231e-05	0.0016794	0.318001	0.239442	0.59268	1	yes	no
ZK849.5	best-26	-1.49019	0.528769	0.0019336	0.0328243	1.67565	0.528769	0.000398669	0.00817495	-0.102094	0.528769	0.849331	1	yes	no
ZK849.6	ZK849.6	-1.53857	1.51391	7.50567e-05	0.00199308	1.55341	1.51391	5.64831e-05	0.00140469	0.134882	1.51391	0.744876	1	yes	no
ZK856.18	ZK856.18	-1.44647	1.64114	9.45764e-05	0.00243738	2.18897	1.64114	1.81175e-09	1.12982e-07	-3.44968	1.64114	1.93101e-09	4.30321e-07	yes	no
ZK858.8	ZK858.8	-1.34594	3.3353	5.17461e-07	2.27949e-05	1.538	3.3353	8.47076e-09	4.66775e-07	0.273481	3.3353	0.317302	1	yes	no
ZK892.3	ZK892.3	-1.66587	2.22002	9.51375e-07	3.96793e-05	1.85605	2.22002	3.9087e-08	1.89641e-06	0.690919	2.22002	0.0483877	1	yes	no
ZK892.5	ZK892.5	-1.20849	2.73689	5.98078e-05	0.00163495	1.37274	2.73689	4.48789e-06	0.000141487	0.164323	2.73689	0.594726	1	yes	no
ZK896.5	ZK896.5	-1.55113	3.3268	2.15066e-06	8.40681e-05	1.63175	3.3268	4.78565e-07	1.87956e-05	3.26314	3.3268	7.41502e-26	6.12899e-23	yes	yes
ZK899.2	ZK899.2	-1.09313	4.67258	3.73633e-08	2.03868e-06	1.14521	4.67258	7.26256e-09	4.05606e-07	0.594997	4.67258	0.00279345	0.167537	yes	no
ZK930.4	ZK930.4	-1.2077	1.79105	0.000741349	0.0145772	1.3119	1.79105	0.000221126	0.00479609	0.298184	1.79105	0.419853	1	yes	no
ZK930.6	ZK930.6	-1.47628	0.764016	0.000890498	0.0170168	1.22004	0.764016	0.00643086	0.0925462	0.43428	0.764016	0.354303	1	no	no
ZK930.7	ZK930.7	-1.6664	1.01731	0.000103134	0.00263551	1.58241	1.01731	0.000221693	0.00480381	0.319226	1.01731	0.489479	1	yes	no
ZK938.1	ZK938.1	-1.13035	6.00675	7.24797e-14	8.60313e-12	1.12192	6.00675	1.00193e-13	1.05681e-11	0.317481	6.00675	0.0356948	1	yes	no
ZK945.6	ZK945.6	-1.29387	1.53089	0.000777266	0.0151719	1.6043	1.53089	2.32889e-05	0.000629168	0.442275	1.53089	0.266456	1	yes	no
ZK945.7	ZK945.7	-1.19051	4.57901	3.29605e-09	2.1345e-07	1.34069	4.57901	2.40737e-11	2.04947e-09	0.179155	4.57901	0.378573	1	yes	no
ZK970.8	ZK970.8	-1.36535	1.31926	0.000683952	0.0136075	1.64473	1.31926	3.20045e-05	0.000837627	0.295883	1.31926	0.483236	1	yes	no
ZK973.8	ZK973.8	-1.23154	2.30649	0.000206868	0.00486773	1.61009	2.30649	8.84192e-07	3.27065e-05	0.343137	2.30649	0.313588	1	yes	no
