# Supplementary material for: Hypoxia-inducible factor cell non-autonomously regulates C. elegans stress responses and behavior via a nuclear receptor
Source: eLife journal article supplement (doi:10.7554/elife.36828), 2018-07-16
Supplement: supp [file elife_poa_e36828_Supplementary_file_2.xlsx]

## Sheet: egl-9(lf) upregulated genes
Supplementary File 2. Genes which were significantly differentially expressed between wild type and egl-9(lf) and at least twofold upregulated in egl-9(lf) vs.wild type.
		egl-9(lf) vs. wild type				egl-9(lf) hif-1(lf) vs. egl-9(lf)				cyp-36A1(lf); egl-9(lf) vs. egl-9(lf)
gene_id	genename	log2 FC	log2 CPM	P-value	FDR	log2 FC	log2 CPM	P-value	FDR	log2 FC	log2 CPM	P-value	FDR	Suppressed by hif-1(lf)?	Suppressed by cyp-36A1(lf)?
B0024.1	col-149	1.55937	7.27286	1.18018e-28	3.64982e-26	-1.28791	7.27286	1.71768e-20	3.25364e-18	-0.988231	7.27286	7.1103e-13	2.37677e-10	yes	yes
B0024.2	col-150	1.55174	4.23797	1.23628e-12	1.29499e-10	-1.26875	4.23797	2.86481e-09	1.72272e-07	-1.02841	4.23797	1.16835e-06	0.000173577	yes	yes
B0024.4	B0024.4	2.28036	0.88025	5.42498e-07	2.37596e-05	-3.21158	0.88025	1.31878e-10	9.7803e-09	-3.03088	0.88025	5.00925e-10	1.2049e-07	yes	yes
B0024.8	che-12	3.70447	3.05	7.32472e-30	2.34499e-27	-3.58314	3.05	4.22405e-29	1.27172e-26	-0.603185	3.05	0.0223326	0.823168	yes	no
B0034.1	B0034.1	1.90164	1.87783	1.07178e-07	5.38987e-06	-2.09171	1.87783	5.82468e-09	3.29758e-07	-0.556556	1.87783	0.0870542	1	yes	no
B0213.4	nlp-29	1.4602	3.09478	1.18894e-07	5.95269e-06	-1.96604	3.09478	3.42115e-12	3.12935e-10	-1.03859	3.09478	0.000105772	0.0103411	yes	yes
B0218.8	clec-52	5.22345	4.42144	7.12696e-94	1.0125e-90	-4.05152	4.42144	2.37356e-69	2.45237e-66	-3.45757	4.42144	2.4678e-55	7.47923e-52	yes	yes
B0222.3	pitr-3	1.89489	1.0613	9.01541e-06	0.000304268	-1.75201	1.0613	2.70236e-05	0.000717778	-0.749571	1.0613	0.0515281	1	yes	no
B0222.6	col-144	1.61859	5.23076	1.95839e-20	3.93939e-18	-1.72268	5.23076	5.35414e-23	1.19904e-20	-0.738916	5.23076	1.12483e-05	0.00137832	yes	yes
B0222.7	col-145	2.93686	1.59988	1.20512e-14	1.53033e-12	-3.34798	1.59988	6.09193e-18	9.68341e-16	-2.40161	1.59988	2.17539e-11	6.29907e-09	yes	yes
B0294.1	B0294.1	1.32104	0.7516	0.00210315	0.035294	-2.4054	0.7516	3.84406e-07	1.55062e-05	-0.846802	0.7516	0.0394666	1	yes	no
B0365.6	clec-41	2.14829	6.90323	2.78608e-49	1.73504e-46	-1.5523	6.90323	4.92689e-28	1.42663e-25	-0.571586	6.90323	3.31364e-05	0.00361655	yes	yes
B0416.7	B0416.7	1.1448	1.56748	0.00248176	0.0407304	-0.205078	1.56748	0.562556	1	-0.343716	1.56748	0.333633	1	no	no
B0462.4	B0462.4	6.77281	2.36145	5.52654e-37	2.43925e-34	-8.21354	2.36145	4.27736e-41	2.11362e-38	-0.174471	2.36145	0.554563	1	yes	no
B0507.3	B0507.3	2.03179	0.967092	2.54056e-05	0.000762856	-0.963225	0.967092	0.0231272	0.265458	0.556646	0.967092	0.150778	1	no	no
B0547.3	B0547.3	2.10468	0.182465	0.00010854	0.00274739	-1.15984	0.182465	0.0176983	0.215244	-0.615758	0.182465	0.186868	1	no	no
C01C10.3	acl-12	1.76379	4.90688	9.16145e-20	1.77229e-17	-1.32337	4.90688	1.97733e-12	1.85343e-10	0.0468873	4.90688	0.794824	1	yes	no
C02A12.4	lys-7	3.33146	6.48858	1.12544e-98	1.76426e-95	-1.67197	6.48858	8.06766e-31	2.67711e-28	-2.9359	6.48858	1.96958e-81	1.27913e-77	yes	yes
C02D5.1	acdh-6	2.0818	0.494003	4.45098e-05	0.00126229	-2.66998	0.494003	8.82561e-07	3.26727e-05	-0.47171	0.494003	0.282069	1	yes	no
C02D5.2	C02D5.2	1.34896	2.51735	2.85495e-05	0.000846633	-1.12594	2.51735	0.000350881	0.00729017	-0.0570838	2.51735	0.84871	1	yes	no
C02F12.5	C02F12.5	1.6414	3.07319	9.86355e-09	5.9708e-07	-1.86398	3.07319	9.89739e-11	7.53677e-09	-0.512653	3.07319	0.0556524	1	yes	no
C03D6.1	C03D6.1	1.61846	1.97372	5.0375e-06	0.000179054	-1.61614	1.97372	3.94912e-06	0.000125722	-0.633905	1.97372	0.0535134	1	yes	no
C03E10.5	clec-223	1.42377	5.76427	1.41052e-19	2.67181e-17	-2.27692	5.76427	9.88245e-44	5.28549e-41	-0.11689	5.76427	0.438182	1	yes	no
C03E10.6	clec-222	2.76656	3.86007	5.49068e-27	1.60008e-24	-4.52491	3.86007	2.44318e-52	1.6097e-49	-0.221794	3.86007	0.325702	1	yes	no
C03G6.5	C03G6.5	1.18351	2.0642	0.000589448	0.0120112	-0.901022	2.0642	0.0074699	0.104844	0.0895061	2.0642	0.779801	1	no	no
C04C3.5	dyf-3	1.49678	1.32869	0.000198021	0.00467649	-2.13514	1.32869	4.87512e-07	1.91059e-05	0.575264	1.32869	0.104696	1	yes	no
C04F6.3	cht-1	1.45125	1.92498	4.26423e-05	0.00121693	-1.66427	1.92498	3.66411e-06	0.000118054	-0.0625038	1.92498	0.847397	1	yes	no
C06A5.12	C06A5.12	1.37444	0.79047	0.00249706	0.0409519	-0.669474	0.79047	0.116674	0.865836	-0.0530012	0.79047	0.896736	1	no	no
C08F11.12	C08F11.12	1.4862	3.97381	2.43608e-10	1.88988e-08	-1.60747	3.97381	6.69957e-12	6.03107e-10	-1.15425	3.97381	4.45989e-07	7.0892e-05	yes	yes
C09E8.3	mlt-10	3.0423	3.41967	3.54455e-24	8.8054e-22	-3.1668	3.41967	7.14439e-26	1.85595e-23	0.852088	3.41967	0.000557972	0.0425604	yes	no
C09F12.1	clc-1	1.06577	3.73953	1.71862e-05	0.000544461	-0.865388	3.73953	0.000390731	0.00801943	-0.371046	3.73953	0.120797	1	yes	no
C09G5.4	col-39	2.57067	7.16894	3.01926e-69	2.69134e-66	-2.32023	7.16894	1.3497e-58	1.13627e-55	-1.56532	7.16894	3.56742e-29	3.68587e-26	yes	yes
C09H5.2	catp-3	1.02643	5.98113	6.16343e-12	5.97432e-10	-1.10139	5.98113	2.22955e-13	2.28282e-11	-0.684415	5.98113	3.66031e-06	0.000483725	yes	yes
C10C5.5	C10C5.5	1.36196	4.79531	7.07316e-12	6.81256e-10	-2.59555	4.79531	1.1598e-33	4.21806e-31	0.90174	4.79531	1.19818e-06	0.000176852	yes	no
C11E4.1	gpx-5	1.91817	6.62229	8.26261e-39	3.99603e-36	-1.94476	6.62229	5.03752e-40	2.43628e-37	-0.289745	6.62229	0.0381759	1	yes	no
C12D8.14	fipr-4	1.64693	3.17446	1.68247e-08	9.79342e-07	-1.28717	3.17446	4.51917e-06	0.000142374	-0.0563895	3.17446	0.831741	1	yes	no
C12D8.16	fipr-7	1.17673	3.36282	2.34424e-05	0.000711425	-0.784911	3.36282	0.00342846	0.0539872	-0.0864162	3.36282	0.739959	1	no	no
C12D8.17	fipr-6	3.96009	0.608575	3.02666e-10	2.32032e-08	-1.15097	0.608575	0.0101582	0.136385	-1.21165	0.608575	0.00708056	0.343987	no	no
C12D8.6	fipr-8	1.99681	2.38304	1.95447e-08	1.12046e-06	-1.47815	2.38304	8.21037e-06	0.000245884	-0.283757	2.38304	0.359619	1	yes	no
C13G3.1	C13G3.1	1.21129	2.87736	4.85114e-05	0.00136303	-1.40882	2.87736	2.49368e-06	8.32342e-05	0.310246	2.87736	0.26335	1	yes	no
C14C6.5	C14C6.5	3.44572	6.00709	1.97544e-96	2.89695e-93	-2.36053	6.00709	8.0372e-53	5.45342e-50	-2.63031	6.00709	1.71178e-63	7.07447e-60	yes	yes
C14F11.4	C14F11.4	1.36164	5.19687	1.30903e-14	1.65765e-12	-1.30641	5.19687	8.91295e-14	9.46709e-12	-0.653323	5.19687	0.000134236	0.0126346	yes	yes
C15A11.4	C15A11.4	1.7022	0.928198	3.79436e-05	0.00109521	-1.22064	0.928198	0.00188076	0.0322393	-3.22595	0.928198	6.22213e-12	1.89842e-09	yes	yes
C15A11.5	col-7	2.52534	5.85416	1.96477e-56	1.37416e-53	-2.48446	5.85416	6.43135e-56	4.87293e-53	-1.47915	5.85416	9.86369e-23	6.79414e-20	yes	yes
C15A11.6	col-62	2.30294	5.38317	6.75074e-40	3.40995e-37	-1.93492	5.38317	3.1728e-30	1.01577e-27	-1.40887	5.38317	1.86052e-17	9.29462e-15	yes	yes
C16E9.1	C16E9.1	1.18613	2.8328	5.57012e-05	0.00153562	-1.07139	2.8328	0.000211394	0.00459803	-0.549413	2.8328	0.0516839	1	yes	no
C17C3.15	C17C3.15	1.87113	0.855881	5.13452e-05	0.00143291	-0.669824	0.855881	0.100611	0.785621	-1.59216	0.855881	0.000270424	0.0233721	no	yes
C17G1.7	C17G1.7	1.98127	6.01533	1.00894e-36	4.3271e-34	-1.76497	6.01533	2.40899e-30	7.82249e-28	0.0120399	6.01533	0.934344	1	yes	no
C17H12.6	C17H12.6	1.66865	0.660617	0.000425195	0.00908355	-1.65491	0.660617	0.000400973	0.0082148	-0.552153	0.660617	0.194173	1	yes	no
C17H12.8	C17H12.8	1.85831	5.97136	1.28096e-31	4.47953e-29	-1.38452	5.97136	2.41701e-19	4.25891e-17	0.91466	5.97136	5.74867e-10	1.36827e-07	yes	no
C24B9.9	dod-3	1.22315	6.02801	7.35443e-16	1.0547e-13	-1.28639	6.02801	2.73694e-17	4.00078e-15	0.296892	6.02801	0.0423911	1	yes	no
C24H11.1	C24H11.1	6.62064	1.34958	1.7389e-07	8.44572e-06	3.32222	1.34958	4.39791e-15	5.27529e-13	1.91797	1.34958	1.57286e-05	0.00187674	no	no
C25B8.4	clec-266	3.3256	0.168081	3.80956e-07	1.71982e-05	-2.73351	0.168081	4.8942e-06	0.000153339	0.20011	0.168081	0.658258	1	yes	no
C25D7.5	C25D7.5	1.6478	2.16179	1.77265e-06	7.04428e-05	-1.24353	2.16179	0.000178512	0.00396645	-0.298471	2.16179	0.343169	1	yes	no
C25E10.8	C25E10.8	1.82743	2.83918	4.50376e-10	3.36752e-08	-1.81572	2.83918	4.41672e-10	3.03306e-08	-2.5388	2.83918	8.34109e-17	3.79194e-14	yes	yes
C25E10.9	swm-1	1.51624	4.58814	5.36792e-14	6.49019e-12	-1.93758	4.58814	3.88966e-21	7.75561e-19	-0.524609	4.58814	0.00654749	0.324597	yes	no
C26B9.3	C26B9.3	2.73467	3.37521	2.87632e-20	5.73511e-18	-3.07585	3.37521	2.38804e-24	5.86825e-22	0.00593142	3.37521	0.981162	1	yes	no
C26F1.5	grl-10	1.37862	1.38474	0.000351668	0.00772814	-0.992722	1.38474	0.00762815	0.106735	-0.90987	1.38474	0.0135937	0.570097	no	no
C29E4.1	col-90	4.15885	0.200942	4.76236e-13	5.13037e-11	-3.47338	0.200942	4.15772e-11	3.35727e-09	-1.85851	0.200942	3.60235e-05	0.00388072	yes	yes
C29F4.1	col-125	2.5201	4.39301	3.88985e-31	1.30027e-28	-2.52256	4.39301	1.10007e-31	3.81758e-29	-1.62084	4.39301	2.85404e-15	1.15846e-12	yes	yes
C30F2.3	C30F2.3	1.11458	2.51992	0.000578545	0.0118155	-0.734567	2.51992	0.0187909	0.225396	0.141932	2.51992	0.637432	1	no	no
C30G7.1	hil-1	1.67118	2.61519	6.01565e-08	3.15429e-06	-1.69885	2.61519	3.33242e-08	1.63425e-06	-0.297459	2.61519	0.300536	1	yes	no
C31C9.2	C31C9.2	3.63793	7.1889	1.14722e-115	1.93162e-112	-3.78137	7.1889	2.31719e-123	4.58008e-120	0.027522	7.1889	0.840435	1	yes	no
C32B5.10	fbxc-32	1.02859	3.55404	7.65542e-05	0.00202339	-0.698758	3.55404	0.00595091	0.0865024	0.25324	3.55404	0.303755	1	no	no
C32H11.10	dod-21	5.62721	2.35041	7.70498e-40	3.84919e-37	-6.72209	2.35041	8.47267e-46	4.75526e-43	-1.3359	2.35041	7.30704e-06	0.000915112	yes	yes
C32H11.12	dod-24	3.03079	7.68567	1.05021e-93	1.44678e-90	-3.02877	7.68567	5.79538e-94	7.98375e-91	-0.821055	7.68567	1.48614e-09	3.39505e-07	yes	yes
C33A12.7	ethe-1	2.33245	5.03387	1.53448e-31	5.3251e-29	-2.47401	5.03387	4.73352e-35	1.88763e-32	0.27786	5.03387	0.116117	1	yes	no
C33H5.17	zgpa-1	1.90773	0.467225	5.82948e-05	0.00159936	-8.60083	0.467225	1.46823e-17	2.20288e-15	0.138256	0.467225	0.734811	1	yes	no
C34B7.3	cyp-36A1	2.5109	4.85496	3.25991e-34	1.31149e-31	-2.76011	4.85496	2.14524e-40	1.04865e-37	-1.79114	4.85496	3.4868e-20	2.08571e-17	yes	yes
C34C12.7	C34C12.7	1.23967	4.12992	5.1759e-08	2.75852e-06	-1.44365	4.12992	2.47608e-10	1.77268e-08	-0.0704511	4.12992	0.7444	1	yes	no
C34D4.11	grsp-3	1.4408	0.883212	0.000543023	0.0111804	-1.19219	0.883212	0.00317495	0.0505026	-1.48372	0.883212	0.000316187	0.0264231	no	yes
C34H4.4	col-107	2.1806	2.22807	3.66143e-11	3.25738e-09	-2.11326	2.22807	8.34505e-11	6.44099e-09	-1.32332	2.22807	1.82792e-05	0.00213622	yes	yes
C35B1.8	C35B1.8	5.27259	1.59623	2.29241e-28	7.04158e-26	-7.37909	1.59623	6.57092e-36	2.74056e-33	-1.17869	1.59623	0.000386379	0.0313534	yes	yes
C35E7.1	vet-2	1.61841	2.94549	7.28924e-08	3.76564e-06	-1.81979	2.94549	1.83783e-09	1.14139e-07	0.19891	2.94549	0.466943	1	yes	no
C36C5.12	C36C5.12	2.58189	1.34011	1.11123e-10	9.15173e-09	-3.3888	1.34011	2.08909e-15	2.61631e-13	-1.82511	1.34011	8.13236e-07	0.00012448	yes	yes
C36F7.2	swah-1	1.09118	4.97614	3.78308e-09	2.43257e-07	-0.456799	4.97614	0.0113483	0.149711	-0.061829	4.97614	0.729127	1	no	no
C37A5.2	fipr-22	2.59992	1.96452	2.516e-13	2.81724e-11	-3.09593	1.96452	7.1464e-17	1.0121e-14	-3.14235	1.96452	1.38737e-17	7.06759e-15	yes	yes
C37A5.4	fipr-23	2.29531	0.00546959	1.16226e-05	0.000382605	-2.05545	0.00546959	5.34442e-05	0.00133496	-3.58621	0.00546959	2.27081e-09	4.91587e-07	yes	yes
C37C3.10	C37C3.10	7.95769	1.16615	6.02066e-14	7.18386e-12	-4.2583	1.16615	1.54844e-10	1.13721e-08	1.86314	1.16615	1.05153e-06	0.000156733	yes	no
C38C6.6	tag-297	4.51547	0.0760991	2.48522e-13	2.78965e-11	-4.28701	0.0760991	5.31928e-13	5.33818e-11	-1.8017	0.0760991	7.7727e-05	0.00794055	yes	yes
C39E9.8	C39E9.8	1.03771	5.84016	9.04662e-12	8.60394e-10	-1.24535	5.84016	3.77365e-16	5.01619e-14	-0.62715	5.84016	2.80216e-05	0.00313766	yes	yes
C42D4.3	C42D4.3	3.37661	1.61147	2.04207e-17	3.23466e-15	-3.90589	1.61147	1.46716e-21	2.96437e-19	-1.93258	1.61147	2.64107e-08	5.06605e-06	yes	yes
C44C1.6	C44C1.6	1.56821	0.92293	0.000543888	0.0111932	-0.821803	0.92293	0.0502604	0.481232	-0.508736	0.92293	0.212957	1	no	no
C45B2.2	C45B2.2	1.64144	4.07695	2.82184e-13	3.13652e-11	-1.31	4.07695	2.58535e-09	1.5671e-07	-2.22965	4.07695	3.52937e-22	2.35954e-19	yes	yes
C45H4.14	C45H4.14	1.08633	2.06782	0.0018163	0.0311182	-0.919374	2.06782	0.00737024	0.103701	0.0991595	2.06782	0.759416	1	no	no
C47A10.5	ddo-1	1.54993	3.42286	6.11492e-09	3.83965e-07	-1.45961	3.42286	3.21665e-08	1.58432e-06	-0.165476	3.42286	0.507319	1	yes	no
C48B4.1	C48B4.1	1.47681	2.66799	9.34422e-07	3.90798e-05	-1.57156	2.66799	1.60743e-07	6.92656e-06	-2.37523	2.66799	6.21159e-14	2.24115e-11	yes	yes
C50B6.4	col-161	4.39717	3.01249	4.94127e-41	2.61204e-38	-5.83897	3.01249	3.71677e-57	3.01729e-54	-2.68264	3.01249	2.65458e-21	1.69971e-18	yes	yes
C50F7.5	C50F7.5	2.76234	2.43124	1.09486e-15	1.51287e-13	-2.16809	2.43124	3.70416e-11	3.02325e-09	-0.103556	2.43124	0.723842	1	yes	no
C52D10.9	skr-8	4.32164	0.228079	2.81685e-08	1.5674e-06	-2.84549	0.228079	7.03182e-06	0.000214258	1.00468	0.228079	0.024643	0.882122	yes	no
C52E4.1	cpr-1	2.61568	8.59021	1.88419e-74	1.78452e-71	-3.15061	8.59021	3.5011e-102	5.48839e-99	-0.76703	8.59021	1.33438e-08	2.67235e-06	yes	yes
C54F6.14	ftn-1	4.5191	7.00733	9.05594e-165	3.16686e-161	-1.18427	7.00733	1.4355e-17	2.1609e-15	0.0727269	7.00733	0.59291	1	yes	no
C55B6.1	C55B6.1	1.01913	3.64911	5.6421e-05	0.00155358	-1.12234	3.64911	9.28855e-06	0.000274737	0.00207597	3.64911	0.993165	1	yes	no
D2063.1	D2063.1	1.99625	1.45216	2.20459e-07	1.04508e-05	-1.78501	1.45216	2.10791e-06	7.16737e-05	-9.61269	1.45216	6.26251e-29	6.32666e-26	yes	yes
E01G4.7	E01G4.7	1.9759	4.18782	1.39643e-17	2.23532e-15	-2.14843	4.18782	2.55294e-20	4.79583e-18	-0.0874646	4.18782	0.67957	1	yes	no
E02H9.7	E02H9.7	1.03421	2.70395	0.000667562	0.0133457	-1.04166	2.70395	0.000556088	0.011001	-0.518357	2.70395	0.0773023	1	yes	no
E03G2.4	col-186	1.89416	2.208	3.65689e-08	2.00538e-06	-1.326	2.208	4.74315e-05	0.00119661	-0.427103	2.208	0.169253	1	yes	no
E04F6.6	E04F6.6	1.65309	3.21065	2.36554e-09	1.56081e-07	-1.44856	3.21065	9.89642e-08	4.39357e-06	-0.65931	3.21065	0.0117551	0.510896	yes	no
EEED8.12	EEED8.12	2.22182	0.0933534	0.00030485	0.00682363	-1.63472	0.0933534	0.00377317	0.0585035	0.561658	0.0933534	0.229907	1	no	no
EEED8.4	EEED8.4	2.65796	0.213138	1.57038e-06	6.29551e-05	-2.05623	0.213138	6.77198e-05	0.00164666	-0.81005	0.213138	0.078005	1	yes	no
F01D5.1	F01D5.1	3.82584	4.19471	4.96886e-53	3.37149e-50	-2.6129	4.19471	9.90955e-31	3.26448e-28	-1.37875	4.19471	9.01184e-11	2.42419e-08	yes	yes
F01D5.2	F01D5.2	1.75686	0.518976	0.00014761	0.00362235	-1.25352	0.518976	0.00398172	0.061438	-1.98015	0.518976	1.81766e-05	0.0021297	no	yes
F01D5.3	F01D5.3	1.99187	2.12147	1.59755e-09	1.09542e-07	-1.899	2.12147	5.28525e-09	3.00717e-07	-3.15749	2.12147	1.19678e-18	6.47699e-16	yes	yes
F01D5.5	F01D5.5	4.49986	3.2942	8.20828e-44	4.55069e-41	-3.12262	3.2942	2.91999e-28	8.6762e-26	-1.31568	3.2942	2.41923e-07	4.0434e-05	yes	yes
F01G10.3	ech-9	3.97943	2.42559	1.21331e-25	3.34292e-23	-5.52449	2.42559	8.48859e-36	3.50818e-33	-0.314194	2.42559	0.280981	1	yes	no
F02C12.5	cyp-13B1	1.99274	0.7797	2.82259e-06	0.000107021	-2.02481	0.7797	1.81528e-06	6.26135e-05	-4.04719	0.7797	6.79206e-15	2.69903e-12	yes	yes
F02D10.6	F02D10.6	1.22085	1.43957	0.00256906	0.041891	-0.99066	1.43957	0.0122502	0.159458	0.384261	1.43957	0.289932	1	no	no
F02H6.5	sqrd-1	6.50733	7.66212	3.3427e-256	5.06542e-252	-7.70706	7.66212	1.43394e-298	3.25941e-294	-0.425882	7.66212	0.00168589	0.109803	yes	no
F08E10.7	scl-24	1.51654	1.70658	2.09519e-05	0.000645273	-1.60686	1.70658	6.41654e-06	0.000197096	-9.79167	1.70658	9.44702e-32	1.07368e-28	yes	yes
F08F1.8	tth-1	1.22712	3.3964	3.15148e-06	0.000117917	-1.10355	3.3964	2.16611e-05	0.000590016	-0.57478	3.3964	0.0234973	0.856415	yes	no
F08F3.7	cyp-14A5	1.56158	3.98959	5.52908e-11	4.77866e-09	-0.249344	3.98959	0.264574	1	-0.836553	3.98959	0.00023742	0.0207565	no	yes
F08G5.3	F08G5.3	1.82572	2.45806	2.22168e-08	1.26566e-06	-1.60796	2.45806	4.43311e-07	1.7632e-05	0.0757369	2.45806	0.796731	1	yes	no
F08G5.4	col-130	2.7486	1.47465	1.28472e-11	1.20422e-09	-2.9869	1.47465	3.15463e-13	3.22276e-11	-0.791958	1.47465	0.0223442	0.823168	yes	no
F08G5.5	ugt-65	4.31755	5.11949	4.67749e-85	5.18642e-82	-4.25941	5.11949	1.30075e-85	1.64259e-82	0.234931	5.11949	0.168784	1	yes	no
F08G5.6	F08G5.6	2.70241	7.33923	1.92547e-76	1.90291e-73	-2.09919	7.33923	1.47517e-49	9.06251e-47	-2.04453	7.33923	2.5211e-47	5.73058e-44	yes	yes
F09G8.6	col-91	4.86699	1.72617	4.65613e-29	1.45981e-26	-5.23766	1.72617	3.59339e-32	1.26635e-29	-2.52621	1.72617	3.6007e-13	1.23076e-10	yes	yes
F10G2.3	clec-7	1.65905	3.16754	5.19316e-09	3.2927e-07	-0.272206	3.16754	0.30201	1	-0.230951	3.16754	0.380197	1	no	no
F11D5.5	F11D5.5	2.20305	1.17379	1.51404e-06	6.08575e-05	-2.20306	1.17379	1.16775e-06	4.23003e-05	0.758543	1.17379	0.0390256	1	yes	no
F11G11.10	col-17	3.06124	0.310017	6.03705e-10	4.44095e-08	-4.72375	0.310017	3.07959e-16	4.14683e-14	-3.98534	0.310017	5.50886e-14	2.00351e-11	yes	yes
F11G11.12	col-73	4.90864	0.0529661	1.51559e-13	1.72682e-11	-3.84039	0.0529661	3.27215e-11	2.70464e-09	-2.64326	0.0529661	1.45609e-07	2.51693e-05	yes	yes
F12A10.1	F12A10.1	3.51639	2.79773	8.92856e-26	2.49019e-23	-3.91221	2.79773	6.35243e-30	1.99164e-27	-1.36711	2.79773	1.48338e-06	0.000214082	yes	yes
F14B6.3	F14B6.3	2.09817	0.471892	0.000212211	0.00496518	-1.74329	0.471892	0.00109919	0.0200604	0.818522	0.471892	0.0592388	1	yes	no
F14D7.7	F14D7.7	1.40437	0.868318	0.00114002	0.0209993	-1.30129	0.868318	0.00206413	0.0349544	-1.55398	0.868318	0.000301394	0.0254607	yes	yes
F14E5.5	lips-10	1.51424	3.1462	3.90336e-08	2.11755e-06	-2.06681	3.1462	3.5826e-13	3.65177e-11	-1.58363	3.1462	8.21712e-09	1.68303e-06	yes	yes
F15B9.1	far-3	5.31667	6.44994	3.96394e-197	2.00228e-193	-5.87409	6.44994	4.64789e-224	3.01854e-220	-4.23447	6.44994	7.38834e-147	1.67941e-142	yes	yes
F15G9.1	F15G9.1	1.03978	4.90236	2.70064e-08	1.51199e-06	-0.858377	4.90236	3.36724e-06	0.000109576	-0.320977	4.90236	0.0771411	1	yes	no
F15H10.1	col-12	1.73136	6.89633	3.20394e-34	1.30049e-31	-1.76625	6.89633	1.13168e-35	4.59351e-33	-1.79347	6.89633	1.20563e-36	1.76804e-33	yes	yes
F15H10.2	col-13	2.32285	6.15198	1.63628e-51	1.06267e-48	-2.44673	6.15198	6.30623e-57	4.94289e-54	-1.71614	6.15198	9.57716e-31	1.03664e-27	yes	yes
F16H6.1	clec-42	6.15496	0.0104343	2.0418e-18	3.54284e-16	-5.67284	0.0104343	5.04791e-18	8.10894e-16	-7.08783	0.0104343	1.56548e-20	9.61736e-18	yes	yes
F17E9.4	F17E9.4	1.24423	5.26099	8.26398e-13	8.86058e-11	-1.13363	5.26099	4.76378e-11	3.80609e-09	-0.495692	5.26099	0.00328165	0.189806	yes	no
F18G5.2	pes-8	1.3176	0.761188	0.00266143	0.0431804	-1.26646	0.761188	0.00324069	0.0513328	-1.01279	0.761188	0.0160011	0.646602	no	no
F19C7.7	col-110	2.0583	2.12256	8.19077e-09	5.05925e-07	-2.8345	2.12256	6.31954e-14	6.8403e-12	0.776902	2.12256	0.0112454	0.497786	yes	no
F19H6.2	glb-13	1.36089	2.25823	7.17815e-05	0.00191843	-1.59654	2.25823	3.49883e-06	0.000113291	0.179315	2.25823	0.564846	1	yes	no
F21C10.11	F21C10.11	1.49146	1.32342	0.000184536	0.00439225	-0.772116	1.32342	0.0398722	0.405829	-1.46129	1.32342	0.000204682	0.0183532	no	yes
F21D5.3	F21D5.3	1.98066	6.35772	2.01582e-39	9.96101e-37	-2.25721	6.35772	9.22725e-50	5.82611e-47	-0.285135	6.35772	0.0451917	1	yes	no
F21F8.3	asp-5	1.95575	10.1857	1.10394e-44	6.27326e-42	-1.95697	10.1857	9.22803e-45	5.11604e-42	-0.187791	10.1857	0.162302	1	yes	no
F21F8.4	F21F8.4	3.0651	2.97073	3.27761e-23	7.88377e-21	-3.35683	2.97073	4.19677e-27	1.14245e-24	-1.26518	2.97073	3.15089e-06	0.000420066	yes	yes
F21F8.7	asp-6	1.75747	10.2487	6.95733e-37	3.01226e-34	-1.68638	10.2487	2.92024e-34	1.14446e-31	-0.292061	10.2487	0.0298617	0.999663	yes	no
F22B5.4	F22B5.4	3.84912	5.66478	2.50585e-93	3.35054e-90	-3.44447	5.66478	1.32235e-81	1.54141e-78	0.586039	5.66478	0.000123028	0.0118244	yes	no
F22D6.10	col-60	2.36494	0.987378	2.1371e-08	1.219e-06	-3.60506	0.987378	2.42742e-14	2.67847e-12	-0.6889	0.987378	0.0619066	1	yes	no
F22E12.4	egl-9	1.78481	6.23607	3.26857e-31	1.1089e-28	-1.96626	6.23607	3.94016e-37	1.75612e-34	0.0960962	6.23607	0.5061	1	yes	no
F22F7.8	F22F7.8	1.49816	2.50779	3.59784e-06	0.000132899	-1.26501	2.50779	4.87198e-05	0.00122435	-0.238813	2.50779	0.42276	1	yes	no
F23B2.12	pcp-2	2.64735	6.53776	8.71154e-68	7.33398e-65	-2.79565	6.53776	9.2954e-75	1.00614e-71	-0.4615	6.53776	0.000996661	0.0695994	yes	no
F23D12.2	F23D12.2	1.0368	3.17773	0.000171173	0.00410644	-0.914535	3.17773	0.000807899	0.0153628	-0.157073	3.17773	0.552244	1	yes	no
F23D12.6	fipr-3	1.16239	2.09806	0.000651013	0.0130435	-1.07918	2.09806	0.00122164	0.0220231	-0.0651616	2.09806	0.837185	1	yes	no
F23H12.4	sqt-3	2.91186	4.44916	3.51044e-38	1.62845e-35	-3.37992	4.44916	1.27646e-47	7.53628e-45	-0.501591	4.44916	0.011357	0.501086	yes	no
F23H12.5	F23H12.5	1.95228	0.96501	8.90914e-06	0.000301129	-2.92932	0.96501	9.57372e-10	6.19105e-08	-0.322358	0.96501	0.398535	1	yes	no
F26H9.5	F26H9.5	2.6836	8.37244	2.73224e-76	2.64278e-73	-2.76121	8.37244	2.60185e-80	2.88494e-77	0.0297027	8.37244	0.825253	1	yes	no
F27D9.5	pcca-1	1.00144	8.43065	2.11927e-13	2.38476e-11	-1.38144	8.43065	1.09213e-23	2.59943e-21	-0.0355052	8.43065	0.791888	1	yes	no
F28C6.1	aptf-4	2.27331	0.637856	1.15581e-05	0.00038103	-2.04921	0.637856	5.00304e-05	0.00125451	0.303603	0.637856	0.464145	1	yes	no
F29C6.1	F29C6.1	2.3388	5.56538	5.02131e-41	2.62384e-38	-2.40908	5.56538	7.08138e-44	3.83246e-41	-0.0632671	5.56538	0.687584	1	yes	no
F29G6.1	F29G6.1	3.89374	2.28335	7.39595e-24	1.82732e-21	-3.61487	2.28335	1.83122e-22	3.85413e-20	-0.245446	2.28335	0.408089	1	yes	no
F30B5.1	dpy-13	3.13551	0.277495	1.13037e-09	7.94245e-08	-3.18231	0.277495	3.8644e-10	2.67396e-08	-3.23673	0.277495	1.7044e-10	4.45308e-08	yes	yes
F32A5.4	F32A5.4	1.62301	5.85553	1.72554e-25	4.6973e-23	-1.40046	5.85553	6.52884e-20	1.18723e-17	-0.186389	5.85553	0.207868	1	yes	no
F32A7.7	str-245	3.31489	0.370377	2.65998e-08	1.49475e-06	-3.32661	0.370377	1.86457e-08	9.65437e-07	-0.000825549	0.370377	0.998452	1	yes	no
F35B12.8	glb-15	1.48856	0.43171	0.00287635	0.0459819	-1.56331	0.43171	0.00162027	0.0283304	0.156515	0.43171	0.717862	1	yes	no
F35C12.3	F35C12.3	1.2219	1.90336	0.000471457	0.00988604	-1.26328	1.90336	0.000277601	0.00588621	-0.351524	1.90336	0.284871	1	yes	no
F35C5.5	clec-62	1.45098	4.25684	2.23695e-11	2.02577e-09	-1.37689	4.25684	1.56329e-10	1.14627e-08	-0.693897	4.25684	0.000913798	0.0651131	yes	no
F35C5.6	clec-63	1.07108	9.42702	3.51046e-15	4.59911e-13	-0.942601	9.42702	3.68736e-12	3.36608e-10	-0.283747	9.42702	0.0348186	1	yes	no
F35C5.9	clec-66	1.68876	3.65962	1.05721e-11	9.97129e-10	-1.56125	3.65962	1.9256e-10	1.39973e-08	-2.85059	3.65962	4.96041e-27	4.61772e-24	yes	yes
F35E12.5	F35E12.5	4.23116	7.40098	1.26951e-158	3.84754e-155	-4.53293	7.40098	3.04027e-176	1.06318e-172	-6.32748	7.40098	1.66142e-271	7.553e-267	yes	yes
F35E12.7	dct-17	3.97808	4.07834	1.11907e-52	7.48149e-50	-3.72656	4.07834	5.66209e-49	3.43205e-46	-0.985644	4.07834	5.02494e-06	0.000647136	yes	yes
F35E12.9	F35E12.9	1.80812	4.52696	1.60359e-18	2.80387e-16	-1.9288	4.52696	8.45237e-21	1.62132e-18	-0.93193	4.52696	2.21389e-06	0.000302239	yes	yes
F35G2.4	phy-2	2.86005	5.43602	1.33929e-57	9.51333e-55	-3.13415	5.43602	3.38609e-67	3.42078e-64	-0.201806	5.43602	0.205121	1	yes	no
F36F12.8	ztf-28	2.27517	4.15292	1.47981e-21	3.18833e-19	-1.01206	4.15292	4.1692e-06	0.000132265	-0.0678651	4.15292	0.750192	1	yes	no
F37B1.5	gst-16	1.8131	2.72583	9.9635e-09	6.02328e-07	-1.6111	2.72583	1.84559e-07	7.87078e-06	-0.199025	2.72583	0.487713	1	yes	no
F37B1.8	gst-19	7.97358	7.30747	1.25104e-275	2.84367e-271	-8.32664	7.30747	6.24034e-287	9.4564e-283	0.170032	7.30747	0.211561	1	yes	no
F38A3.2	ram-2	1.68502	5.65587	1.23028e-25	3.36925e-23	-1.69728	5.65587	2.95892e-26	7.77545e-24	-0.60783	5.65587	7.96344e-05	0.00810531	yes	yes
F38A5.14	nspb-1	1.73365	0.465011	0.000272396	0.00618552	-1.89697	0.465011	6.29331e-05	0.00154482	-0.572044	0.465011	0.180456	1	yes	no
F38B2.6	F38B2.6	1.64802	0.84437	0.000638323	0.012863	-0.248949	0.84437	0.555848	1	0.0364398	0.84437	0.929602	1	no	no
F38E11.1	hsp-12.3	3.30263	2.82576	1.69393e-21	3.63244e-19	-3.50534	2.82576	1.25409e-23	2.93878e-21	-0.0491419	2.82576	0.859441	1	yes	no
F39E9.11	btb-17	1.12256	2.2089	0.000898582	0.0171424	-0.546138	2.2089	0.0910704	0.737739	-0.187203	2.2089	0.555179	1	no	no
F41E7.2	F41E7.2	1.43919	2.115	5.37016e-05	0.00148894	-1.25069	2.115	0.000321107	0.00673023	0.4755	2.115	0.134683	1	yes	no
F42A10.8	nas-28	1.85765	0.89956	4.36176e-05	0.00124164	-1.48374	0.89956	0.000637358	0.0124017	-0.367867	0.89956	0.354297	1	yes	no
F42E11.1	pgp-4	1.43369	1.23501	0.000689021	0.0136964	-0.362768	1.23501	0.346807	1	-0.369142	1.23501	0.337981	1	no	no
F43D9.4	sip-1	1.01282	9.76651	9.23952e-14	1.0907e-11	-0.895179	9.76651	4.01615e-11	3.25451e-09	0.101593	9.76651	0.44952	1	yes	no
F44A2.3	F44A2.3	1.81772	1.95019	2.3233e-07	1.09678e-05	-1.3975	1.95019	3.44801e-05	0.000892655	-0.891869	1.95019	0.00642265	0.320505	yes	no
F44B9.1	dpf-6	2.20633	2.96414	2.76532e-13	3.08123e-11	-2.62876	2.96414	2.41204e-17	3.5646e-15	-0.119205	2.96414	0.657968	1	yes	no
F44E5.4	F44E5.4	1.1621	2.01431	0.000528564	0.0109334	-0.846517	2.01431	0.00914823	0.12523	-9.96192	2.01431	7.4097e-35	1.02076e-31	no	yes
F44E7.2	F44E7.2	1.11945	4.55155	3.15068e-08	1.73827e-06	-1.14254	4.55155	1.40808e-08	7.4781e-07	-0.116016	4.55155	0.551177	1	yes	no
F44F1.7	vet-6	4.3894	0.487567	1.70229e-10	1.34732e-08	-5.77847	0.487567	1.15048e-12	1.09418e-10	0.686286	0.487567	0.0995621	1	yes	no
F46A8.7	F46A8.7	2.5722	1.26994	2.50681e-09	1.64924e-07	-2.72944	1.26994	3.80997e-10	2.64435e-08	-0.376967	1.26994	0.296436	1	yes	no
F46C5.1	F46C5.1	4.27816	4.45413	4.5275e-52	2.98297e-49	-3.91419	4.45413	1.89297e-48	1.13232e-45	1.18766	4.45413	3.66966e-09	7.68786e-07	yes	no
F47H4.10	skr-5	2.51807	0.689421	5.27511e-07	2.31479e-05	-1.7305	0.689421	0.000137989	0.00313186	-0.0350732	0.689421	0.930124	1	yes	no
F48C1.9	F48C1.9	6.52573	2.48569	2.24032e-48	1.37631e-45	-11.5934	2.48569	1.8131e-59	1.55519e-56	-5.8171	2.48569	8.74017e-46	1.72755e-42	yes	yes
F48D6.1	taf-11.1	1.1035	3.18414	6.45041e-05	0.00174624	-1.04158	3.18414	0.000140974	0.00319363	-0.0503064	3.18414	0.84792	1	yes	no
F49E11.10	scl-2	1.70051	5.37903	9.96802e-24	2.43632e-21	-1.42803	5.37903	1.32611e-17	2.00954e-15	-0.871575	5.37903	1.00296e-07	1.76727e-05	yes	yes
F49F1.1	F49F1.1	3.59439	2.97768	1.93775e-30	6.2923e-28	-2.93441	2.97768	2.62155e-23	6.01911e-21	-6.81555	2.97768	2.04788e-59	7.75821e-56	yes	yes
F49F1.5	F49F1.5	5.11721	1.74755	8.52843e-31	2.78929e-28	-4.46242	1.74755	9.17413e-28	2.62305e-25	-4.18828	1.74755	5.80947e-26	4.9831e-23	yes	yes
F49F1.6	mul-1	2.7966	0.978296	1.15236e-10	9.43921e-09	-2.61784	0.978296	4.88078e-10	3.32661e-08	-5.24321	0.978296	3.06169e-21	1.93316e-18	yes	yes
F49F1.7	F49F1.7	3.73028	3.02247	6.0979e-33	2.31014e-30	-3.82077	3.02247	9.98024e-35	3.94532e-32	-5.89798	3.02247	8.34908e-56	2.71113e-52	yes	yes
F52B11.4	col-133	1.48409	6.96115	4.59135e-26	1.30455e-23	-1.81711	6.96115	1.38817e-37	6.31076e-35	-1.49296	6.96115	1.73942e-26	1.52069e-23	yes	yes
F53A9.8	F53A9.8	1.6527	4.7938	6.41745e-18	1.06476e-15	-0.921617	4.7938	6.70458e-07	2.54644e-05	-1.88869	4.7938	1.24817e-22	8.46914e-20	yes	yes
F53B2.8	F53B2.8	1.96958	3.58429	2.03743e-14	2.5446e-12	-1.99787	3.58429	8.75227e-15	1.01243e-12	-1.246	3.58429	4.28644e-07	6.8374e-05	yes	yes
F53B6.9	fip-6	1.3249	1.61441	0.000251247	0.00575994	-1.19436	1.61441	0.000764282	0.0146172	-1.16368	1.61441	0.000965556	0.0678441	yes	no
F53F4.5	fmo-4	1.34628	5.19328	2.19272e-14	2.71616e-12	-1.45843	5.19328	1.38562e-16	1.92048e-14	-0.302615	5.19328	0.0744231	1	yes	no
F53F8.4	F53F8.4	1.14823	3.6146	4.27071e-06	0.000153966	-1.15953	3.6146	3.05094e-06	0.000100434	-0.814302	3.6146	0.000873213	0.0626137	yes	no
F53H2.1	F53H2.1	3.49205	0.386695	2.93642e-09	1.92076e-07	-3.77109	0.386695	2.95448e-10	2.08561e-08	-0.483747	0.386695	0.262034	1	yes	no
F53H4.2	F53H4.2	1.7919	5.07496	4.7819e-22	1.07619e-19	-1.45193	5.07496	1.09723e-15	1.39724e-13	-0.621729	5.07496	0.000391911	0.0316459	yes	yes
F54D1.2	col-126	4.46533	2.68276	4.39747e-37	1.95993e-34	-4.00772	2.68276	8.16215e-34	3.04147e-31	-3.40243	2.68276	5.07877e-27	4.61772e-24	yes	yes
F54D1.3	col-127	4.46533	2.68276	4.39747e-37	1.95993e-34	-4.00772	2.68276	8.16215e-34	3.04147e-31	-3.40243	2.68276	5.07877e-27	4.61772e-24	yes	yes
F54D10.1	skr-15	1.15868	2.30807	0.000528619	0.0109334	-1.06526	2.30807	0.001245	0.0223592	0.0521273	2.30807	0.866674	1	yes	no
F54D8.1	dpy-17	1.35282	1.43174	0.000590864	0.0120346	-1.24473	1.43174	0.00129782	0.0231827	-0.395595	1.43174	0.277903	1	yes	no
F54F7.3	F54F7.3	2.40808	3.83967	2.64986e-21	5.65564e-19	-1.68091	3.83967	3.16974e-12	2.91699e-10	-0.821811	3.83967	0.000386901	0.0313534	yes	yes
F55C10.2	col-154	2.06397	1.68442	1.83303e-08	1.06155e-06	-2.0066	1.68442	2.25629e-08	1.14607e-06	-1.51887	1.68442	1.13063e-05	0.00137888	yes	yes
F55G11.4	F55G11.4	4.12504	5.7036	5.46974e-115	8.8807e-112	-2.50978	5.7036	2.91984e-54	2.10697e-51	-2.20243	5.7036	1.6854e-43	3.0648e-40	yes	yes
F55G11.5	dod-22	2.2797	3.46562	5.28556e-18	8.83407e-16	-1.45513	3.46562	6.13214e-09	3.45444e-07	-2.54016	3.46562	1.18624e-21	7.70395e-19	yes	yes
F55G11.7	F55G11.7	6.46482	0.220244	3.25925e-21	6.92377e-19	-9.64824	0.220244	1.04375e-24	2.62155e-22	-7.36361	0.220244	3.21115e-23	2.24588e-20	yes	yes
F55G11.8	F55G11.8	2.29725	4.6238	8.0419e-30	2.55659e-27	-1.85211	4.6238	5.38052e-21	1.0498e-18	-3.02358	4.6238	8.89191e-47	1.83743e-43	yes	yes
F56D5.5	F56D5.5	1.22501	1.98398	0.000514121	0.0106724	-1.28812	1.98398	0.000255325	0.00545971	-0.0239731	1.98398	0.941352	1	yes	no
F56D6.2	clec-67	1.89489	4.56696	4.70121e-20	9.21214e-18	-1.44299	4.56696	5.76865e-13	5.76371e-11	-0.665425	4.56696	0.000617913	0.0466627	yes	yes
F56F10.3	cdo-1	2.91	5.84376	2.03932e-65	1.57135e-62	-2.92973	5.84376	3.78636e-67	3.74199e-64	-0.216681	5.84376	0.14586	1	yes	no
F56G4.2	pes-2.1	3.98749	0.806783	1.38675e-12	1.42631e-10	-3.39003	0.806783	6.79211e-11	5.33292e-09	0.133746	0.806783	0.727002	1	yes	no
F56G4.3	pes-2.2	3.98749	0.806783	1.38675e-12	1.42631e-10	-3.39003	0.806783	6.79211e-11	5.33292e-09	0.133746	0.806783	0.727002	1	yes	no
F57A10.4	F57A10.4	1.14253	3.54097	1.07198e-05	0.000355719	-0.809846	3.54097	0.00141877	0.0250772	0.162112	3.54097	0.509179	1	yes	no
F58B3.1	lys-4	1.9359	4.08186	2.53618e-17	3.98952e-15	-1.57842	4.08186	1.56986e-12	1.48682e-10	-0.797801	4.08186	0.000224225	0.0199026	yes	yes
F58B6.2	exc-6	1.30048	2.29894	9.05635e-05	0.00234593	-1.12171	2.29894	0.000576912	0.0113832	-0.347846	2.29894	0.26485	1	yes	no
F58E6.7	hrg-3	2.07277	0.886708	2.14296e-05	0.00065825	-2.07914	0.886708	1.62164e-05	0.000453951	0.52789	0.886708	0.177623	1	yes	no
F59A7.2	F59A7.2	2.36004	1.9482	4.03129e-10	3.0292e-08	-2.1939	1.9482	2.80358e-09	1.69037e-07	-0.874529	1.9482	0.00872117	0.410003	yes	no
F59B10.4	F59B10.4	3.03649	3.43977	7.57781e-25	1.95736e-22	-3.05327	3.43977	1.30968e-25	3.38292e-23	-0.247627	3.43977	0.317722	1	yes	no
H04M03.2	nspb-6	3.8575	0.367621	1.18986e-10	9.69391e-09	-2.38465	0.367621	1.67729e-06	5.83854e-05	-0.844037	0.367621	0.0526212	1	yes	no
H12D21.4	mpst-2	5.89022	0.498574	3.65057e-13	3.99901e-11	-5.92951	0.498574	1.46379e-13	1.52278e-11	-0.359793	0.498574	0.40392	1	yes	no
H12D21.6	H12D21.6	3.42115	0.684824	1.27546e-08	7.56969e-07	-3.97313	0.684824	4.74414e-10	3.23834e-08	-0.0737651	0.684824	0.861543	1	yes	no
H12D21.7	H12D21.7	3.93439	7.76569	2.90976e-138	7.34892e-135	-3.93667	7.76569	2.19264e-139	5.24629e-136	0.0610326	7.76569	0.651135	1	yes	no
H14A12.5	H14A12.5	1.63326	0.403871	0.00229069	0.0379233	-0.450255	0.403871	0.341276	1	0.274709	0.403871	0.540857	1	no	no
H20E11.1	H20E11.1	1.00786	3.80932	3.27493e-05	0.000959288	-0.957557	3.80932	6.6904e-05	0.00163172	-0.837373	3.80932	0.000454044	0.0360862	yes	yes
H20E11.3	H20E11.3	1.11524	2.88483	0.000128038	0.00318769	-1.37798	2.88483	2.51913e-06	8.38592e-05	-1.08647	2.88483	0.000159228	0.0146236	yes	yes
H23N18.2	ugt-14	3.83913	1.6066	1.67296e-18	2.91396e-16	-3.72236	1.6066	5.35446e-18	8.54102e-16	-2.02988	1.6066	2.88768e-08	5.46988e-06	yes	yes
H29C22.1	H29C22.1	1.22848	3.49142	3.8919e-06	0.000142341	-1.07561	3.49142	3.85108e-05	0.000990237	-0.0620247	3.49142	0.804302	1	yes	no
K01A12.4	K01A12.4	2.62961	3.05184	8.19288e-19	1.46061e-16	-3.46553	3.05184	5.22291e-28	1.50278e-25	-1.38955	3.05184	3.17611e-07	5.2315e-05	yes	yes
K02E11.5	K02E11.5	1.09289	2.33712	0.000860325	0.0165096	-1.59689	2.33712	2.15576e-06	7.30275e-05	-0.129487	2.33712	0.67474	1	yes	no
K03A11.1	K03A11.1	2.22059	1.46793	2.14401e-07	1.02276e-05	-1.35999	1.46793	0.000516255	0.0102805	0.0573228	1.46793	0.872222	1	yes	no
K04E7.3	nas-33	3.40978	3.09284	1.28768e-27	3.82609e-25	-3.30599	3.09284	3.88065e-27	1.06276e-24	-0.303411	3.09284	0.241055	1	yes	no
K04F1.9	K04F1.9	1.3938	1.93633	8.63029e-05	0.00225484	-0.811949	1.93633	0.0163843	0.201852	-0.759626	1.93633	0.0240121	0.866357	no	no
K04F10.1	K04F10.1	1.28072	2.64743	3.41877e-05	0.000997564	-1.56895	2.64743	5.1134e-07	1.99708e-05	-0.373381	2.64743	0.202718	1	yes	no
K07A1.6	K07A1.6	1.25453	3.52356	1.10182e-06	4.55776e-05	-1.41047	3.52356	4.51262e-08	2.16401e-06	-0.756019	3.52356	0.00245468	0.149788	yes	no
K07A12.6	hot-5	1.79997	0.22537	0.0007546	0.0147993	-1.46555	0.22537	0.00403409	0.0621042	-0.0414113	0.22537	0.927116	1	no	no
K08B5.1	K08B5.1	1.56358	0.267526	0.00156097	0.0274283	-1.43191	0.267526	0.00305725	0.0488183	-0.544964	0.267526	0.225716	1	yes	no
K08C7.5	fmo-2	4.98965	1.32514	1.0191e-17	1.65462e-15	-4.71094	1.32514	2.41567e-17	3.5646e-15	0.895915	1.32514	0.0101386	0.461373	yes	no
K08D8.5	K08D8.5	1.20188	3.87405	3.83303e-07	1.72871e-05	-0.924896	3.87405	7.16243e-05	0.00173197	-0.749498	3.87405	0.00118319	0.0807644	yes	no
K08E3.1	tyr-2	4.76915	6.53236	4.61131e-165	1.74696e-161	-4.84893	6.53236	7.1742e-171	2.32961e-167	-0.879352	6.53236	4.55589e-10	1.10757e-07	yes	yes
K08H10.1	lea-1	2.52283	7.94673	3.18276e-69	2.78252e-66	-2.36881	7.94673	3.1295e-62	2.78961e-59	-0.609321	7.94673	6.29526e-06	0.000794969	yes	yes
K10B3.9	mai-1	1.07207	5.57216	4.39431e-11	3.85656e-09	-1.5521	5.57216	7.40855e-21	1.42712e-18	-0.199439	5.57216	0.206833	1	yes	no
K10H10.2	cysl-2	5.4887	9.18723	1.42599e-234	1.29654e-230	-5.63942	9.18723	8.48308e-245	6.42749e-241	0.116952	9.18723	0.383772	1	yes	no
K10H10.3	dhs-8	2.27607	1.40382	4.63092e-06	0.000165769	-1.75157	1.40382	0.000147726	0.00333124	1.18091	1.40382	0.00155423	0.102105	yes	no
K11D12.13	K11D12.13	1.5841	5.9903	9.74457e-25	2.48875e-22	-1.89139	5.9903	7.38287e-34	2.79694e-31	0.0711479	5.9903	0.627356	1	yes	no
K11G12.1	nas-11	1.64389	6.46234	5.00843e-29	1.55951e-26	-1.78418	6.46234	1.12939e-33	4.14057e-31	-0.436239	6.46234	0.00205425	0.128457	yes	no
K11G12.5	K11G12.5	1.10775	6.90432	4.03115e-15	5.251e-13	-1.27067	6.90432	2.7142e-19	4.7641e-17	0.120039	6.90432	0.382977	1	yes	no
K11G12.6	K11G12.6	1.12771	5.30259	7.80017e-11	6.59114e-09	-1.52251	5.30259	5.10194e-18	8.16687e-16	0.139137	5.30259	0.403697	1	yes	no
K11G9.5	K11G9.5	1.19508	1.83045	0.000763364	0.0149261	-1.30471	1.83045	0.000225133	0.00486444	-0.109458	1.83045	0.740647	1	yes	no
K11G9.6	mtl-1	6.35855	3.35551	7.46668e-59	5.38798e-56	-5.91508	3.35551	4.02866e-57	3.2131e-54	-1.0031	3.35551	6.6822e-05	0.00687284	yes	yes
M01E5.6	sepa-1	2.78165	0.712056	9.4069e-08	4.76753e-06	-3.38642	0.712056	9.41875e-10	6.10821e-08	0.124321	0.712056	0.755811	1	yes	no
M01H9.1	trx-3	1.30485	1.75669	0.00027912	0.00631812	-1.42633	1.75669	8.00771e-05	0.00191599	-0.45363	1.75669	0.179584	1	yes	no
M02D8.6	M02D8.6	3.0298	3.3736	9.13138e-26	2.53123e-23	-2.52933	3.3736	3.90796e-20	7.1927e-18	-1.03796	3.3736	4.01365e-05	0.00428321	yes	yes
M02F4.7	clec-265	1.56426	3.38596	3.0963e-09	2.01663e-07	-1.00086	3.38596	8.38912e-05	0.00199465	-1.73479	3.38596	4.84648e-11	1.34345e-08	yes	yes
M04C9.1	M04C9.1	1.0981	1.87153	0.00190501	0.0324116	-1.3173	1.87153	0.000208837	0.00454909	-0.242292	1.87153	0.466735	1	yes	no
M05D6.5	M05D6.5	2.25873	6.28992	1.49116e-46	8.91967e-44	-2.11224	6.28992	4.64406e-42	2.39913e-39	0.145754	6.28992	0.31171	1	yes	no
M05D6.6	M05D6.6	2.2037	7.3496	1.67835e-51	1.07464e-48	-2.0978	7.3496	1.47342e-47	8.5876e-45	0.215282	7.3496	0.114608	1	yes	no
M05D6.7	gbh-2	1.19425	5.7046	1.307e-13	1.49666e-11	-1.76672	5.7046	1.80544e-26	4.79983e-24	0.0750662	5.7046	0.627137	1	yes	no
M162.5	M162.5	4.83436	3.06595	2.25271e-36	9.57106e-34	-4.26425	3.06595	6.64782e-33	2.36107e-30	-0.205549	3.06595	0.438437	1	yes	no
M195.1	col-77	2.31528	1.66412	6.80953e-10	4.96103e-08	-2.04186	1.66412	1.98742e-08	1.02554e-06	-0.402164	1.66412	0.22212	1	yes	no
M199.5	col-135	1.40806	4.7337	9.48406e-14	1.1141e-11	-2.40063	4.7337	8.59332e-34	3.1761e-31	-4.22349	4.7337	4.43417e-79	2.2398e-75	yes	yes
M28.8	M28.8	1.11354	2.15404	0.000750833	0.0147403	-1.17176	2.15404	0.000373844	0.00771813	-0.56648	2.15404	0.0747513	1	yes	no
M60.2	M60.2	2.96726	7.15726	6.82643e-88	7.75841e-85	-3.08842	7.15726	2.31399e-94	3.28738e-91	-1.18859	7.15726	8.15071e-18	4.25907e-15	yes	yes
MTCE.33	MTCE.33	12.3588	4.01165	2.98213e-97	4.51902e-94	-3.96049	4.01165	1.03515e-49	6.44644e-47	-1.15228	4.01165	2.0208e-07	3.4025e-05	yes	yes
R01H2.7	R01H2.7	1.25388	1.47727	0.000758083	0.014842	-1.27448	1.47727	0.000578212	0.011404	-0.516579	1.47727	0.143899	1	yes	no
R03G8.3	R03G8.3	1.30827	1.77084	0.000145385	0.00357649	-1.13118	1.77084	0.000816227	0.0154804	-3.05144	1.77084	6.88694e-15	2.69903e-12	yes	yes
R03G8.6	R03G8.6	1.74805	3.50866	4.57112e-11	4.004e-09	-1.63313	3.50866	3.63929e-10	2.53363e-08	-0.409779	3.50866	0.0965167	1	yes	no
R05H5.8	tts-2	1.31713	1.67416	0.000381302	0.00827021	-1.00656	1.67416	0.00492342	0.0731689	-0.615083	1.67416	0.0779789	1	no	no
R07B1.3	scav-5	2.96316	1.22046	6.40995e-10	4.69248e-08	-1.56854	1.22046	0.000111272	0.00257433	-0.0842725	1.22046	0.818767	1	yes	no
R08E5.1	R08E5.1	6.68976	5.28494	4.5736e-128	9.90097e-125	-7.00161	5.28494	2.03787e-134	4.4116e-131	-0.351026	5.28494	0.0365548	1	yes	no
R08E5.2	cysl-3	1.85053	6.56429	1.18335e-34	4.8465e-32	-2.36592	6.56429	5.56941e-53	3.83623e-50	0.376178	6.56429	0.00776693	0.372068	yes	no
R08E5.3	R08E5.3	7.44672	9.12699	0	0	-7.93741	9.12699	0	0	-0.0807818	9.12699	0.547766	1	yes	no
R08F11.3	cyp-33C8	1.33252	2.36119	3.00791e-05	0.000886214	-0.649151	2.36119	0.0335346	0.35703	-3.25288	2.36119	1.1509e-18	6.30372e-16	no	yes
R09B5.9	cnc-4	1.93315	1.17266	8.29387e-07	3.50416e-05	-3.6053	1.17266	2.13952e-15	2.66479e-13	-1.44017	1.17266	0.000105774	0.0103411	yes	yes
R102.11	R102.11	2.12103	1.23729	1.17042e-06	4.80219e-05	-2.46403	1.23729	3.58075e-08	1.75037e-06	0.115616	1.23729	0.752145	1	yes	no
R11G11.7	pqn-60	1.03612	2.97315	0.000202503	0.00477488	-0.593995	2.97315	0.0291464	0.31936	-2.29399	2.97315	1.76448e-14	6.74075e-12	no	yes
R13A5.6	ttr-8	1.20565	2.96432	1.98123e-05	0.000615644	-1.10427	2.96432	7.67936e-05	0.00184325	-0.763662	2.96432	0.00540797	0.282697	yes	no
R13H4.3	pho-8	3.11163	1.24315	2.05667e-12	2.07774e-10	-1.83044	1.24315	2.10716e-06	7.16737e-05	-1.52213	1.24315	5.38284e-05	0.0056255	yes	yes
R144.15	R144.15	1.87337	0.08496	0.000815283	0.0157784	-1.4135	0.08496	0.00666736	0.0952861	0.0229481	0.08496	0.960495	1	no	no
T01B11.2	T01B11.2	1.43831	7.71221	8.68308e-25	2.23018e-22	-1.69765	7.71221	1.91858e-33	6.92225e-31	0.276352	7.71221	0.0414985	1	yes	no
T01E8.2	ref-1	1.08502	1.81315	0.00274759	0.0442467	-1.33121	1.81315	0.000273658	0.00581074	0.0458869	1.81315	0.891318	1	yes	no
T02B11.4	T02B11.4	1.31554	2.6681	2.07449e-05	0.000641119	-1.23224	2.6681	5.47773e-05	0.00136676	-0.449239	2.6681	0.125625	1	yes	no
T03F6.4	T03F6.4	1.11632	1.68967	0.00198402	0.0335799	-1.27531	1.68967	0.000404827	0.00828256	-0.592294	1.68967	0.0862395	1	yes	no
T04A11.1	T04A11.1	1.36191	2.62515	1.31922e-05	0.000428072	-0.928195	2.62515	0.0021808	0.0365971	-0.108887	2.62515	0.709501	1	yes	no
T04A11.2	T04A11.2	3.44559	4.09147	1.88028e-38	8.90409e-36	-3.62778	4.09147	9.89611e-42	4.94381e-39	0.196367	4.09147	0.3618	1	yes	no
T04A11.4	T04A11.4	1.36191	2.62515	1.31922e-05	0.000428072	-0.928195	2.62515	0.0021808	0.0365971	-0.108887	2.62515	0.709501	1	yes	no
T04A11.5	T04A11.5	3.44559	4.09147	1.88028e-38	8.90409e-36	-3.62778	4.09147	9.89611e-42	4.94381e-39	0.196367	4.09147	0.3618	1	yes	no
T04D3.8	T04D3.8	1.34798	2.21665	5.38939e-05	0.00149304	-0.920899	2.21665	0.00434307	0.0660115	-0.0711989	2.21665	0.818246	1	no	no
T04F8.7	T04F8.7	1.34555	2.38412	3.30576e-05	0.000967073	-1.01629	2.38412	0.00125563	0.0225177	-0.0455992	2.38412	0.879596	1	yes	no
T05A10.3	ttr-14	1.26915	4.55294	2.77949e-10	2.1453e-08	-1.16135	4.55294	5.19924e-09	2.96938e-07	-1.20642	4.55294	1.37637e-09	3.17621e-07	yes	yes
T05B4.1	lgc-1	5.64855	1.8008	2.44866e-18	4.2007e-16	-4.47969	1.8008	3.35376e-16	4.48428e-14	0.484201	1.8008	0.157437	1	yes	no
T05B4.13	T05B4.13	8.44033	4.31564	6.21209e-81	6.30479e-78	-8.43259	4.31564	6.75065e-83	8.07608e-80	0.788369	4.31564	0.000128232	0.0122213	yes	no
T05B4.2	nhr-57	5.37575	6.8909	3.14194e-177	1.29851e-173	-5.76892	6.8909	6.24986e-194	2.84125e-190	0.0971764	6.8909	0.481614	1	yes	no
T05B4.4	T05B4.4	9.07156	1.71213	2.94428e-23	7.11968e-21	-5.94408	1.71213	9.83721e-21	1.87903e-18	0.500383	1.71213	0.140416	1	yes	no
T05E7.5	vet-1	2.93212	1.17172	2.41338e-10	1.87546e-08	-2.75413	1.17172	1.1049e-09	7.07466e-08	0.118968	1.17172	0.742392	1	yes	no
T05H4.15	T05H4.15	1.89507	0.904967	1.67756e-05	0.000532565	-1.95278	0.904967	8.88139e-06	0.000263745	-0.796928	0.904967	0.0446403	1	yes	no
T06E4.4	col-147	1.6116	8.18097	3.44013e-31	1.15846e-28	-1.37635	8.18097	1.27489e-23	2.9722e-21	-0.64591	8.18097	1.76492e-06	0.000249178	yes	yes
T06E4.6	col-146	3.99798	4.68631	1.39533e-72	1.29455e-69	-4.38101	4.68631	7.25601e-85	8.91529e-82	-2.30535	4.68631	7.1306e-32	8.31191e-29	yes	yes
T07D3.4	T07D3.4	1.15896	3.76876	1.73656e-06	6.91293e-05	-1.13219	3.76876	2.50956e-06	8.36414e-05	-0.864016	3.76876	0.000276971	0.0238473	yes	yes
T07H3.1	bath-47	2.43564	1.5004	3.6876e-08	2.01735e-06	-1.4974	1.5004	0.000161608	0.00361559	0.536968	1.5004	0.126239	1	yes	no
T07H3.2	bath-46	3.38107	0.225621	1.80238e-09	1.21389e-07	-3.44483	0.225621	6.36906e-10	4.22692e-08	-0.861609	0.225621	0.0476825	1	yes	no
T07H3.3	math-38	1.02312	2.571	0.00117108	0.0215023	-0.494512	2.571	0.103266	0.801944	0.38466	2.571	0.191564	1	no	no
T08A9.2	ttr-30	1.06094	2.16067	0.0011711	0.0215023	-1.30711	2.16067	7.07397e-05	0.00171149	-0.452943	2.16067	0.148876	1	yes	no
T09F5.9	clec-47	3.38414	4.66043	6.70101e-33	2.51764e-30	-1.9068	4.66043	1.90005e-15	2.38614e-13	2.66623	4.66043	1.30677e-38	2.04852e-35	yes	no
T10D4.13	ins-19	7.21708	1.01682	2.59338e-24	6.47789e-22	-9.55992	1.01682	8.90074e-27	2.3943e-24	-1.31106	1.01682	0.000509962	0.0396975	yes	yes
T10E10.1	col-168	1.66736	4.23325	2.26871e-14	2.80266e-12	-1.35348	4.23325	2.33736e-10	1.68131e-08	-1.07723	4.23325	3.3333e-07	5.47058e-05	yes	yes
T10E10.2	col-167	2.64214	6.31776	1.23288e-65	9.83299e-63	-2.38511	6.31776	6.41392e-56	4.87293e-53	-1.56101	6.31776	1.20209e-26	1.07154e-23	yes	yes
T10E10.5	col-169	3.32235	3.60135	1.62332e-33	6.30749e-31	-3.12592	3.60135	1.43305e-31	4.9097e-29	-2.09403	3.60135	6.23124e-17	2.95082e-14	yes	yes
T10E10.6	col-170	3.69062	1.16598	6.97185e-16	1.003e-13	-3.70423	1.16598	1.60282e-16	2.20805e-14	-1.54965	1.16598	2.88129e-05	0.0032026	yes	yes
T10H4.12	cpr-3	1.71401	3.52383	3.26995e-11	2.92629e-09	-1.48134	3.52383	5.22005e-09	2.97752e-07	-1.96184	3.52383	4.58725e-14	1.69545e-11	yes	yes
T13F2.8	cav-1	1.02539	3.63788	5.46744e-05	0.00151281	-1.39133	3.63788	6.94362e-08	3.1821e-06	0.0620179	3.63788	0.798204	1	yes	no
T16H12.9	T16H12.9	1.29893	1.41943	0.000983051	0.018513	-0.789397	1.41943	0.0359719	0.37695	-0.299964	1.41943	0.410804	1	no	no
T19B10.2	T19B10.2	2.12453	4.09662	3.02061e-20	5.9965e-18	-2.37853	4.09662	1.61548e-24	4.01319e-22	-1.24386	4.09662	1.35565e-08	2.70304e-06	yes	yes
T19D12.4	T19D12.4	1.43388	4.60048	1.3285e-12	1.37888e-10	-1.08905	4.60048	3.31882e-08	1.6311e-06	-1.21808	4.60048	8.29705e-10	1.95436e-07	yes	yes
T20B3.12	clec-26	1.37596	1.04263	0.0022368	0.0371664	-0.354553	1.04263	0.381568	1	-0.21789	1.04263	0.587175	1	no	no
T21C9.8	ttr-23	1.97579	1.31357	1.25788e-06	5.13786e-05	-1.51129	1.31357	0.000107926	0.00250199	-0.695285	1.31357	0.0579152	1	yes	no
T22B2.1	T22B2.1	3.64359	0.652713	8.09092e-10	5.82918e-08	-2.95273	0.652713	4.35042e-08	2.08843e-06	0.0568108	0.652713	0.889731	1	yes	no
T24B8.5	T24B8.5	1.99772	5.04783	8.62041e-28	2.57824e-25	-2.0154	5.04783	1.82633e-28	5.46229e-26	-5.43598	5.04783	1.04413e-119	1.58225e-115	yes	yes
T24D8.5	nlp-2	1.57856	0.856003	0.000843336	0.0162247	-1.13068	0.856003	0.0117121	0.153708	0.297283	0.856003	0.460859	1	no	no
T26C5.4	T26C5.4	1.10125	2.83727	0.00017669	0.00422318	-0.955062	2.83727	0.00095775	0.0178225	-0.140178	2.83727	0.616096	1	yes	no
T26H5.9	T26H5.9	2.35989	0.404258	2.23862e-06	8.69086e-05	-2.91357	0.404258	2.1121e-08	1.08007e-06	-1.76679	0.404258	0.000128602	0.0122309	yes	yes
T27A1.2	T27A1.2	1.40282	0.799407	0.00267408	0.0433546	-1.33542	0.799407	0.00364547	0.0568638	0.540244	0.799407	0.178922	1	no	no
T27E4.7	T27E4.7	1.66479	3.47531	8.56084e-10	6.13856e-08	-1.71853	3.47531	2.13656e-10	1.54666e-08	0.244304	3.47531	0.324626	1	yes	no
T27F2.4	zip-10	1.60473	1.22834	0.000755858	0.0148112	-1.2568	1.22834	0.0054214	0.0796581	0.773115	1.22834	0.0465193	1	no	no
T27F6.8	T27F6.8	1.2359	1.51216	0.000976574	0.0184139	-1.60466	1.51216	2.90162e-05	0.000764699	-0.640045	1.51216	0.0727867	1	yes	no
T28C12.4	T28C12.4	1.07689	3.93634	8.18847e-06	0.000279053	-1.34572	3.93634	3.14377e-08	1.55347e-06	0.414911	3.93634	0.0683091	1	yes	no
T28C6.4	col-117	2.83602	5.81599	1.53487e-68	1.31654e-65	-2.22399	5.81599	4.2273e-46	2.40221e-43	-1.74097	5.81599	3.6233e-30	3.83067e-27	yes	yes
T28C6.6	col-3	1.46854	6.86318	3.24296e-25	8.62153e-23	-1.41188	6.86318	1.15e-23	2.70881e-21	-0.976284	6.86318	2.15888e-12	6.96063e-10	yes	yes
VF13D12L.3	VF13D12L.3	1.53628	7.76211	3.49386e-28	1.0589e-25	-1.81164	7.76211	6.84072e-38	3.14127e-35	-0.224743	7.76211	0.0968724	1	yes	no
W04G3.1	lpr-6	6.73686	3.56407	7.35841e-67	6.0822e-64	-6.04674	3.56407	1.71639e-63	1.59242e-60	0.17086	3.56407	0.470021	1	yes	no
W05G11.6	W05G11.6	3.75928	9.38868	1.55039e-136	3.70959e-133	-4.9626	9.38868	1.09149e-208	6.20251e-205	-0.228215	9.38868	0.089224	1	yes	no
W06B11.4	hog-1	2.67223	0.529831	3.10115e-07	1.41659e-05	-2.25706	0.529831	4.60297e-06	0.000144814	-0.105286	0.529831	0.798543	1	yes	no
W07A12.4	W07A12.4	1.77611	1.78597	2.68656e-06	0.000102375	-1.64052	1.78597	9.52957e-06	0.000280404	-0.142038	1.78597	0.672781	1	yes	no
W07A12.5	col-78	9.92372	2.14684	1.59064e-33	6.23378e-31	-6.75247	2.14684	6.4412e-31	2.15311e-28	-0.0581293	2.14684	0.851475	1	yes	no
W07A12.6	oac-54	5.78428	5.55434	3.00215e-123	5.68669e-120	-5.62879	5.55434	7.90528e-124	1.63355e-120	0.0866716	5.55434	0.585289	1	yes	no
W07A12.7	rhy-1	5.62173	8.09406	2.46693e-224	1.60213e-220	-5.12813	8.09406	2.79772e-203	1.41319e-199	0.0417551	8.09406	0.756462	1	yes	no
W07G4.5	W07G4.5	1.18112	5.74817	9.0171e-14	1.06752e-11	-1.29506	5.74817	3.08315e-16	4.14683e-14	0.0131595	5.74817	0.93116	1	yes	no
W09G12.1	dsl-2	2.59571	0.717679	1.35797e-06	5.50713e-05	-2.79473	0.717679	2.46404e-07	1.0258e-05	0.831653	0.717679	0.0374153	1	yes	no
Y102A11A.5	Y102A11A.5	4.98037	1.97596	5.63897e-21	1.17056e-18	-5.72556	1.97596	1.13795e-23	2.69439e-21	1.6817	1.97596	1.24058e-07	2.16915e-05	yes	no
Y102A5C.34	Y102A5C.34	8.80188	0.399359	2.69657e-18	4.59135e-16	-8.80188	0.399359	9.79525e-19	1.6554e-16	-3.78613	0.399359	1.28144e-11	3.75841e-09	yes	yes
Y105C5A.8	Y105C5A.8	1.02292	4.61318	2.17172e-07	1.03381e-05	-1.28287	4.61318	1.0648e-10	8.05439e-09	-0.523304	4.61318	0.0067031	0.331228	yes	no
Y105C5B.13	skr-10	1.40558	1.42384	0.000397468	0.00856771	-1.5681	1.42384	8.13175e-05	0.00194158	-0.0467123	1.42384	0.896303	1	yes	no
Y119D3B.18	fbxa-91	1.97258	0.619505	1.27017e-05	0.000414821	-1.64704	0.619505	0.000154534	0.00346586	-2.34216	0.619505	4.26495e-07	6.82707e-05	yes	yes
Y11D7A.10	Y11D7A.10	2.07053	6.55861	1.09879e-42	5.94665e-40	-2.06075	6.55861	1.11872e-42	5.91374e-40	0.259756	6.55861	0.0651036	1	yes	no
Y11D7A.11	col-120	2.26459	0.786397	1.58146e-06	6.33435e-05	-2.89444	0.786397	6.03862e-09	3.41021e-07	-0.679533	0.786397	0.0925871	1	yes	no
Y22F5A.5	lys-2	1.72805	6.84599	6.91676e-33	2.5774e-30	-1.23669	6.84599	2.43211e-18	3.96295e-16	-1.13525	6.84599	8.4179e-16	3.61025e-13	yes	yes
Y25C1A.14	Y25C1A.14	2.20072	0.912199	7.66385e-07	3.26223e-05	-1.81587	0.912199	1.84693e-05	0.000510415	-1.09739	0.912199	0.00593017	0.301558	yes	no
Y25C1A.6	Y25C1A.6	2.90378	0.85733	6.80585e-08	3.53197e-06	-2.57346	0.85733	5.17706e-07	2.01848e-05	0.607619	0.85733	0.121475	1	yes	no
Y2H9A.3	col-162	3.26281	1.24941	1.35471e-15	1.84944e-13	-3.14691	1.24941	4.36662e-15	5.26482e-13	-3.00827	1.24941	2.87523e-14	1.08025e-11	yes	yes
Y37A1B.5	Y37A1B.5	4.16444	8.66237	1.18331e-156	3.36216e-153	-4.4975	8.66237	3.00574e-176	1.06318e-172	-0.419774	8.66237	0.00182784	0.117699	yes	no
Y37H2A.4	fbxa-107	1.07288	2.99117	0.000136809	0.0033783	-1.58872	2.99117	3.51646e-08	1.72079e-06	-0.231066	2.99117	0.392314	1	yes	no
Y38E10A.11	nspe-4	5.40463	4.95223	1.40481e-90	1.72606e-87	-5.03083	4.95223	2.70742e-86	3.51663e-83	0.0331212	4.95223	0.853615	1	yes	no
Y38E10A.12	nspe-3	11.4666	3.83508	6.97254e-72	6.33957e-69	-9.14511	3.83508	2.30833e-71	2.44044e-68	-0.0777759	3.83508	0.735634	1	yes	no
Y38E10A.13	nspe-1	5.32812	4.7596	8.60958e-82	9.10233e-79	-5.12772	4.7596	4.34309e-81	4.93604e-78	0.0134316	4.7596	0.942625	1	yes	no
Y38E10A.15	nspe-7	4.54222	0.38976	2.81024e-09	1.84352e-07	-4.56178	0.38976	1.80958e-09	1.12982e-07	-0.777394	0.38976	0.10683	1	yes	no
Y38E10A.25	nspe-6	12.4574	4.83523	6.30854e-123	1.14717e-119	-7.80862	4.83523	2.44223e-115	4.62608e-112	-0.54125	4.83523	0.00336111	0.193662	yes	no
Y38E10A.26	nspe-2	8.47733	3.82287	2.92856e-60	2.14734e-57	-6.41242	3.82287	2.3888e-55	1.78028e-52	0.361185	3.82287	0.121587	1	yes	no
Y38E10A.5	clec-4	3.14145	2.20053	6.56872e-19	1.18032e-16	-2.55446	2.20053	1.85785e-14	2.07009e-12	-3.22791	2.20053	4.568e-20	2.66239e-17	yes	yes
Y38E10A.9	Y38E10A.9	6.9489	5.33952	6.5851e-125	1.30159e-121	-5.1135	5.33952	4.56062e-103	7.40465e-100	0.573482	5.33952	0.000525255	0.0406791	yes	no
Y38F1A.5	cyd-1	1.05744	2.41314	0.00107873	0.0200164	-0.923501	2.41314	0.00392616	0.060648	0.124325	2.41314	0.682895	1	no	no
Y39G8B.9	Y39G8B.9	3.10898	1.24221	2.70139e-13	3.01739e-11	-2.17603	1.24221	1.74834e-08	9.10437e-07	-1.58533	1.24221	1.68559e-05	0.00200075	yes	yes
Y40B10A.6	comt-4	2.14915	0.580305	3.38074e-06	0.000125668	-3.9741	0.580305	1.31404e-12	1.24713e-10	-4.03194	0.580305	5.77174e-13	1.94362e-10	yes	yes
Y40D12A.2	Y40D12A.2	1.02176	5.0434	1.84458e-08	1.06688e-06	-1.05281	5.0434	5.56235e-09	3.15299e-07	-0.269958	5.0434	0.125536	1	yes	no
Y41D4B.17	Y41D4B.17	3.25822	0.725506	1.51563e-10	1.21572e-08	-2.48797	0.725506	7.73666e-08	3.51014e-06	-0.218897	0.725506	0.571942	1	yes	no
Y41E3.2	dpy-4	2.76582	0.541329	3.13071e-09	2.03612e-07	-2.80505	0.541329	1.2425e-09	7.88903e-08	-2.89344	0.541329	3.98941e-10	9.85666e-08	yes	yes
Y41G9A.10	Y41G9A.10	2.04925	1.70028	3.13309e-08	1.73066e-06	-2.17068	1.70028	4.35636e-09	2.54229e-07	-0.597381	1.70028	0.0729973	1	yes	no
Y46B2A.1	fbxc-51	2.28709	0.436412	2.30777e-05	0.000701763	-2.24833	0.436412	2.83602e-05	0.000748713	0.293231	0.436412	0.496328	1	yes	no
Y46C8AL.5	clec-72	3.43836	0.516972	1.41551e-11	1.31865e-09	-2.91011	0.516972	1.16874e-09	7.44148e-08	-4.24212	0.516972	1.39373e-14	5.36954e-12	yes	yes
Y46D2A.5	Y46D2A.5	1.75777	1.24617	1.06684e-05	0.00035427	-1.42675	1.24617	0.000163188	0.00364913	-4.64683	1.24617	2.33366e-19	1.29378e-16	yes	yes
Y46G5A.10	cnp-2	1.34907	2.12831	8.30971e-05	0.00217985	-0.818848	2.12831	0.0121702	0.15853	-0.467993	2.12831	0.144155	1	no	no
Y47D3B.10	dpy-18	2.19682	5.23507	1.10341e-33	4.40019e-31	-2.19848	5.23507	3.19313e-34	1.24071e-31	0.0820245	5.23507	0.622306	1	yes	no
Y47D3B.5	twk-31	1.81071	3.14405	2.26677e-10	1.77061e-08	-1.88845	3.14405	3.0778e-11	2.56263e-09	-0.261764	3.14405	0.318843	1	yes	no
Y47D7A.1	skr-7	1.18513	3.15601	2.26457e-05	0.000690474	-1.17963	3.15601	2.25848e-05	0.00061297	0.282098	3.15601	0.282366	1	yes	no
Y47D7A.13	Y47D7A.13	5.09014	1.70625	2.60476e-30	8.39823e-28	-6.50504	1.70625	1.46762e-37	6.60587e-35	-2.27148	1.70625	2.60982e-11	7.50919e-09	yes	yes
Y47D7A.7	Y47D7A.7	1.62141	0.739175	0.000437059	0.00928464	-1.51443	0.739175	0.000833827	0.015742	-1.75563	0.739175	0.000148163	0.0137462	yes	yes
Y47H10A.3	Y47H10A.3	3.17042	0.141314	6.67958e-08	3.48634e-06	-3.80397	0.141314	1.70492e-09	1.06907e-07	-0.753736	0.141314	0.0983755	1	yes	no
Y47H10A.5	Y47H10A.5	1.89258	1.73713	5.99644e-07	2.60865e-05	-1.91528	1.73713	3.00128e-07	1.23812e-05	-1.40664	1.73713	8.51405e-05	0.00856322	yes	yes
Y48G1BL.5	Y48G1BL.5	1.08424	2.2241	0.000994457	0.0187201	-0.55946	2.2241	0.0778875	0.663203	-0.219907	2.2241	0.481374	1	no	no
Y48G1BL.6	Y48G1BL.6	1.50668	1.75366	3.69864e-05	0.00106971	-0.771309	1.75366	0.0248957	0.281329	-0.62771	1.75366	0.0649612	1	no	no
Y51B9A.4	arrd-2	2.62835	0.852234	4.18916e-07	1.87999e-05	-1.80726	0.852234	0.000112897	0.00260927	0.204765	0.852234	0.606897	1	yes	no
Y51H4A.9	col-137	3.88539	0.779389	2.71499e-16	4.06008e-14	-4.37158	0.779389	3.95213e-19	6.88382e-17	-4.51711	0.779389	6.80298e-20	3.86588e-17	yes	yes
Y51H7BM.1	math-45	2.30434	1.86974	2.08683e-09	1.39105e-07	-1.70106	1.86974	1.96868e-06	6.74439e-05	0.349565	1.86974	0.276961	1	yes	no
Y53G8B.2	Y53G8B.2	1.6987	4.44194	1.1244e-15	1.54899e-13	-1.76862	4.44194	7.66837e-17	1.08264e-14	-0.215058	4.44194	0.279401	1	yes	no
Y54G11A.7	Y54G11A.7	1.31452	4.91476	2.5231e-12	2.52094e-10	-1.66317	4.91476	2.13135e-18	3.48538e-16	-0.262598	4.91476	0.144818	1	yes	no
Y54G2A.36	Y54G2A.36	1.2104	2.5385	8.88844e-05	0.0023077	-0.813474	2.5385	0.00693315	0.0984347	-1.02041	2.5385	0.000776017	0.0567179	no	no
Y54G2A.39	clec-80	2.00547	4.15303	4.0356e-18	6.7949e-16	-2.01595	4.15303	1.4882e-18	2.47821e-16	-0.043322	4.15303	0.837872	1	yes	no
Y54G2A.45	Y54G2A.45	1.05787	3.76617	1.47014e-05	0.000472326	-0.603102	3.76617	0.0113449	0.14971	-0.35424	3.76617	0.133565	1	no	no
Y57A10A.26	Y57A10A.26	1.35689	4.69805	2.14021e-11	1.94204e-09	-1.5224	4.69805	6.53447e-14	7.05614e-12	0.483404	4.69805	0.0107881	0.483191	yes	no
Y57A10A.9	tag-276	2.04163	0.830833	8.44245e-05	0.00220957	-1.07197	0.830833	0.020146	0.238753	0.560463	0.830833	0.170038	1	no	no
Y58A7A.1	Y58A7A.1	2.36559	4.36466	5.58064e-25	1.45805e-22	-2.23807	4.36466	2.93438e-23	6.66998e-21	0.100167	4.36466	0.621789	1	yes	no
Y58A7A.2	Y58A7A.2	1.58836	0.299569	0.00254815	0.0416247	-1.813	0.299569	0.000655805	0.0127028	-0.26537	0.299569	0.565615	1	yes	no
Y58A7A.4	Y58A7A.4	7.02599	0.381236	1.12124e-08	6.69812e-07	-0.489747	0.381236	0.357216	1	-0.617144	0.381236	0.252199	1	no	no
Y5H2B.5	cyp-32B1	1.09832	1.66673	0.00186976	0.0318834	-1.21858	1.66673	0.000569175	0.0112403	-1.3985	1.66673	8.70323e-05	0.0086767	yes	yes
Y62E10A.13	Y62E10A.13	2.06448	7.36598	3.23817e-46	1.91182e-43	-2.4455	7.36598	2.69254e-62	2.44811e-59	-0.023993	7.36598	0.860321	1	yes	no
Y62H9A.3	Y62H9A.3	1.045	5.52318	2.25551e-10	1.76485e-08	-0.914578	5.52318	2.12593e-08	1.08438e-06	0.0263522	5.52318	0.868565	1	yes	no
Y67A6A.2	nhr-62	2.18923	2.8461	3.21281e-12	3.16828e-10	-2.12878	2.8461	5.18392e-12	4.68521e-10	-1.41728	2.8461	1.3908e-06	0.000202004	yes	yes
Y68A4A.13	Y68A4A.13	2.33736	0.392884	7.84977e-06	0.000268921	-2.7673	0.392884	3.96205e-07	1.5935e-05	-1.20293	0.392884	0.00950706	0.439228	yes	no
Y70C5C.6	nhr-112	1.67635	0.540751	0.000210016	0.00492649	-1.09455	0.540751	0.0103184	0.138211	-3.15438	0.540751	1.09533e-09	2.54055e-07	no	yes
Y73C8C.2	clec-210	3.36841	4.48025	1.4261e-41	7.62729e-39	-4.18599	4.48025	8.33647e-55	6.11265e-52	0.884656	4.48025	8.67201e-06	0.00107715	yes	no
Y73C8C.8	Y73C8C.8	2.84584	0.662392	1.6913e-07	8.24979e-06	-2.78149	0.662392	1.61329e-07	6.94524e-06	0.0350062	0.662392	0.93215	1	yes	no
Y75B8A.28	Y75B8A.28	1.27165	2.01979	0.000615023	0.01246	-1.185	2.01979	0.00123014	0.0221216	-0.683396	2.01979	0.0521111	1	yes	no
Y79H2A.2	Y79H2A.2	1.66133	2.21712	6.14254e-07	2.66202e-05	-1.80534	2.21712	5.78603e-08	2.71174e-06	-1.21583	2.21712	0.00014037	0.0130765	yes	yes
Y80D3A.5	cyp-42A1	2.20149	2.74291	1.30889e-12	1.36164e-10	-2.46489	2.74291	4.3776e-15	5.26482e-13	-0.538711	2.74291	0.0554165	1	yes	no
Y80D3A.7	ptr-22	2.61494	0.300013	2.08334e-07	9.99056e-06	-3.08852	0.300013	4.728e-09	2.72766e-07	-4.15214	0.300013	1.77861e-12	5.81708e-10	yes	yes
Y82E9BL.10	fbxa-14	1.38136	1.32052	0.00078747	0.0153119	-0.944726	1.32052	0.0155576	0.193612	-0.508863	1.32052	0.17846	1	no	no
Y95B8A.2	Y95B8A.2	1.52339	1.17247	0.000135322	0.00334341	-2.46809	1.17247	9.21138e-09	5.05727e-07	-0.550085	1.17247	0.135922	1	yes	no
ZC168.5	grl-21	5.88839	1.45323	4.13431e-32	1.47992e-29	-10.8407	1.45323	5.47989e-42	2.79912e-39	-3.82672	1.45323	1.06779e-21	7.03516e-19	yes	yes
ZC410.1	nhr-11	1.4496	2.48478	4.1406e-06	0.000149869	-2.39264	2.48478	9.83839e-13	9.41607e-11	-1.79034	2.48478	2.12443e-08	4.145e-06	yes	yes
ZC443.5	ugt-18	4.0546	0.955405	7.82327e-12	7.48744e-10	-4.76083	0.955405	1.2335e-13	1.29507e-11	1.56825	0.955405	2.58295e-05	0.00292099	yes	no
ZK1037.6	ZK1037.6	1.15322	1.50426	0.00247808	0.0406848	-1.06236	1.50426	0.00476948	0.0712538	-0.635379	1.50426	0.0815013	1	no	no
ZK105.5	ZK105.5	1.56039	0.599289	0.00124819	0.0226345	-1.81229	0.599289	0.000216716	0.00470717	-0.257126	0.599289	0.547869	1	yes	no
ZK1058.6	nit-1	4.30695	5.96238	3.50099e-121	6.12149e-118	-5.65083	5.96238	2.4683e-165	6.60068e-162	-1.03667	5.96238	3.93946e-12	1.21831e-09	yes	yes
ZK131.5	his-11	1.96887	2.31444	9.72883e-09	5.90903e-07	-0.657371	2.31444	0.0355265	0.373427	-0.136101	2.31444	0.655429	1	no	no
ZK287.2	sulp-8	2.52186	4.81897	4.26517e-36	1.79536e-33	-2.5009	4.81897	5.12759e-36	2.15838e-33	-0.103445	4.81897	0.567599	1	yes	no
ZK430.5	ZK430.5	3.3781	0.0186553	7.99007e-08	4.0859e-06	-2.98162	0.0186553	5.45594e-07	2.11271e-05	-0.498476	0.0186553	0.283597	1	yes	no
ZK6.10	dod-19	1.46627	6.05207	2.09985e-22	4.82129e-20	-0.796169	6.05207	5.75421e-08	2.69961e-06	-1.8657	6.05207	2.10746e-34	2.66132e-31	yes	yes
ZK637.13	glb-1	2.92287	7.25905	9.80733e-84	1.06155e-80	-3.28316	7.25905	1.24085e-101	1.88034e-98	0.347722	7.25905	0.0106537	0.479057	yes	no
ZK666.6	clec-60	4.93789	3.56315	2.95959e-31	1.01162e-28	-4.82055	3.56315	1.43637e-31	4.9097e-29	1.90761	3.56315	7.34722e-14	2.63001e-11	yes	no
