# Supplementary figures and images for: Hypoxia-inducible factor cell non-autonomously regulates C. elegans stress responses and behavior via a nuclear receptor
Source: eLife journal article supplement (doi:10.7554/elife.36828), 2018-07-16

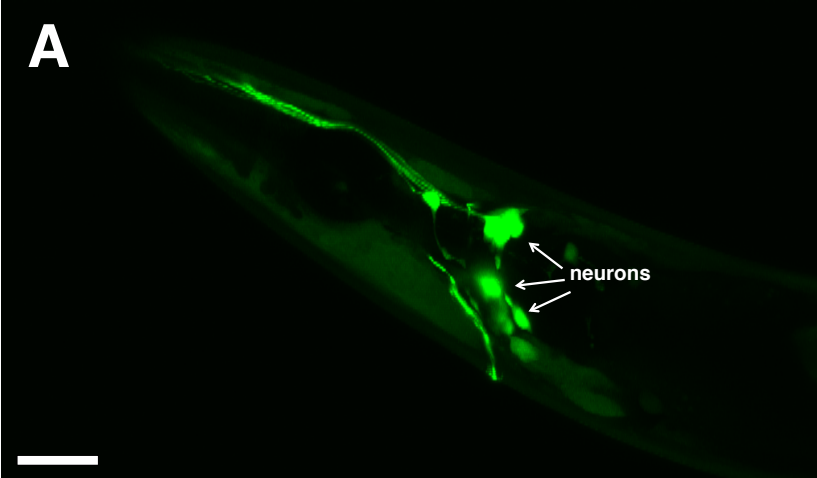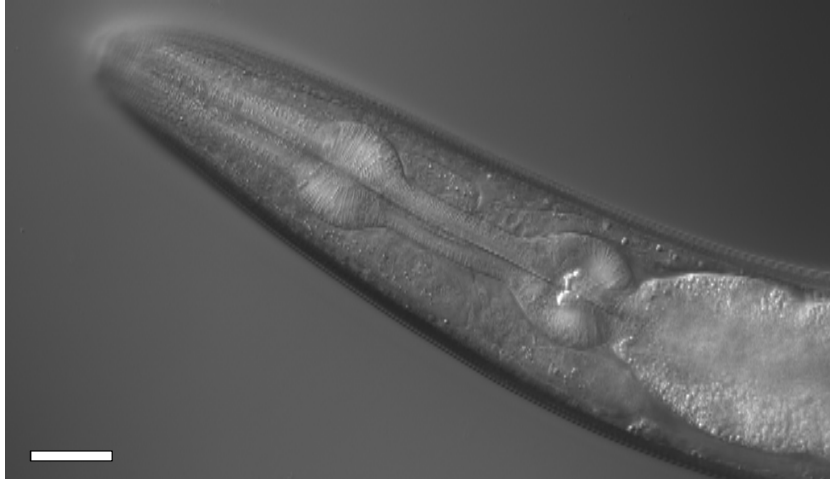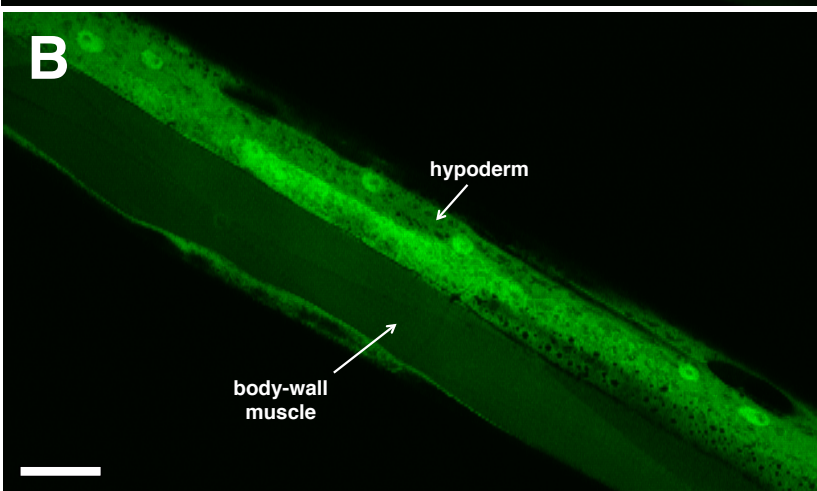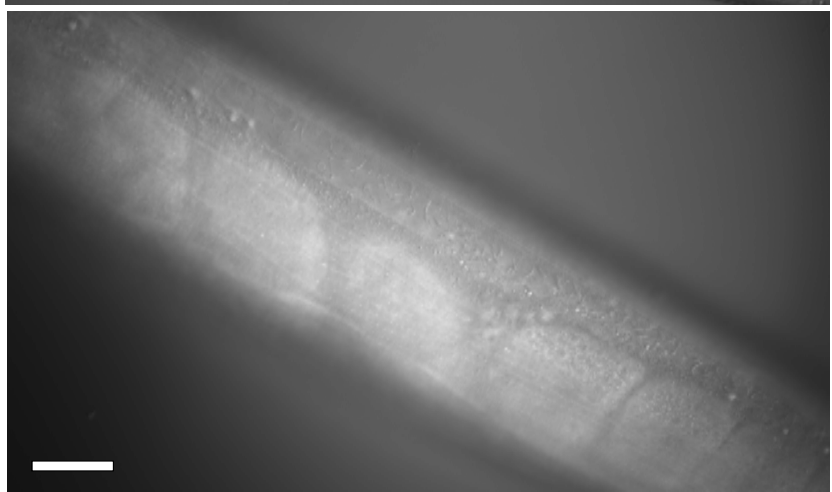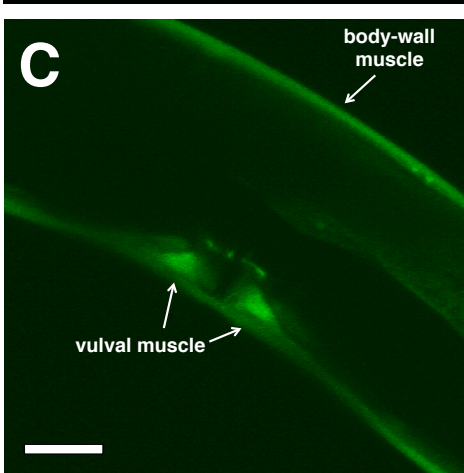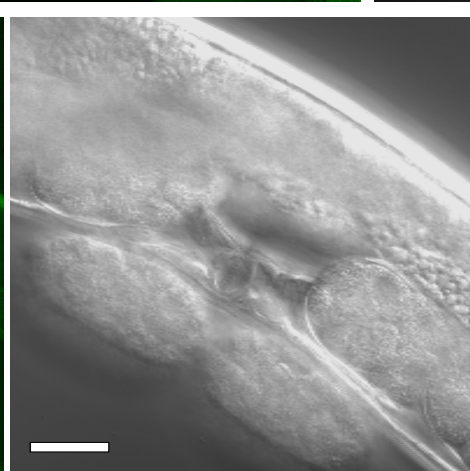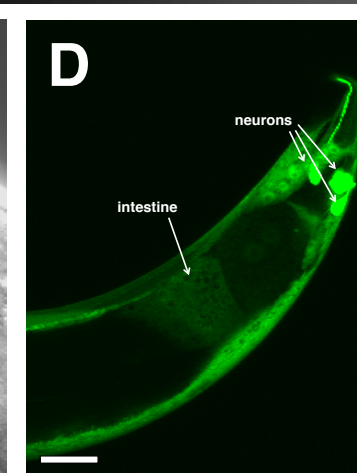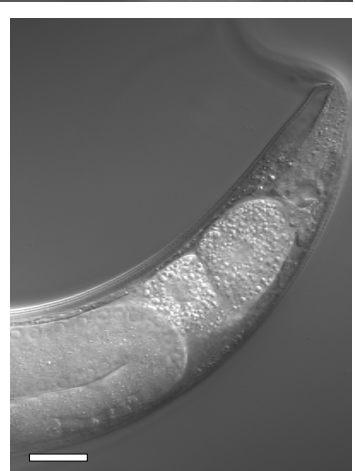

Supplement: supp [file elife-36828-supp-v1.zip]

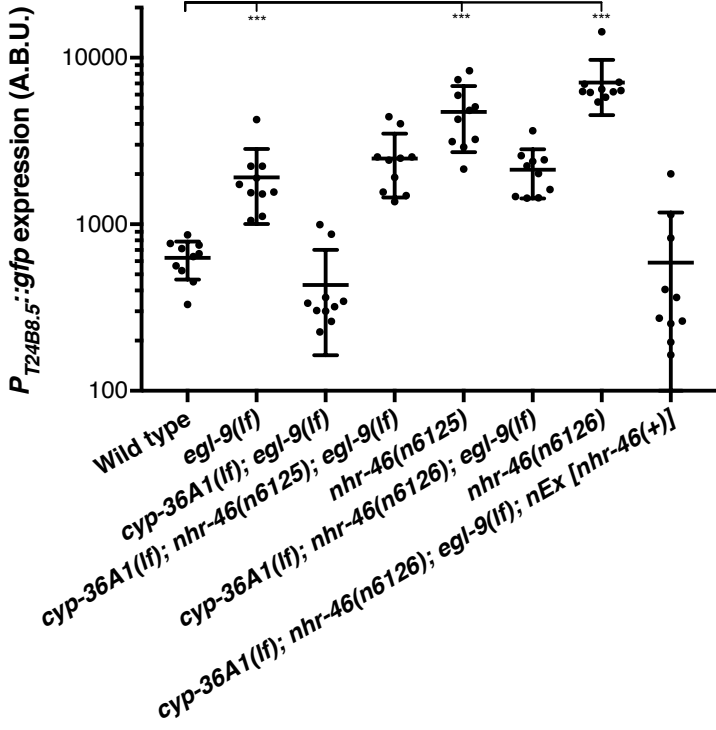

Supplement: supp [file elife-36828-supp-v1.zip]

**A**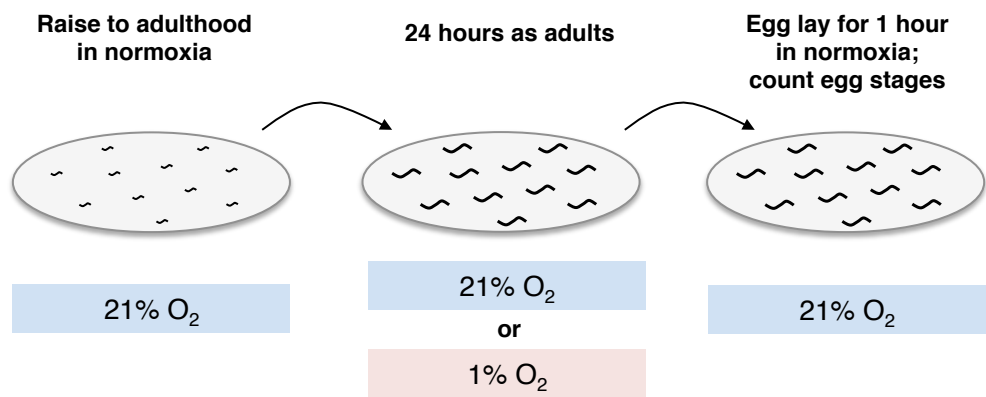**B**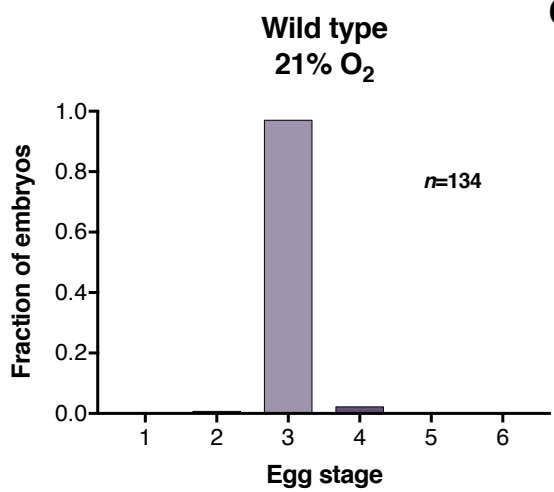**C**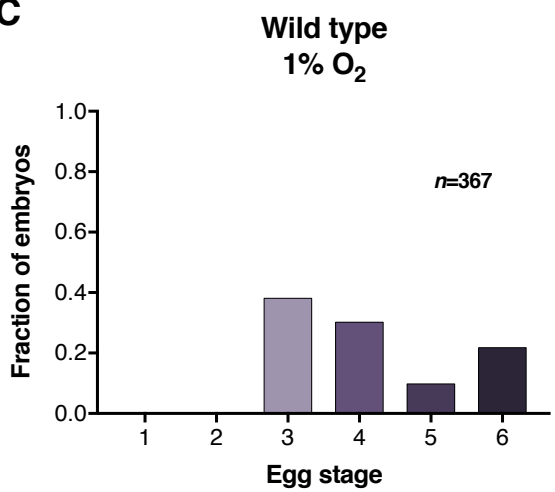**D**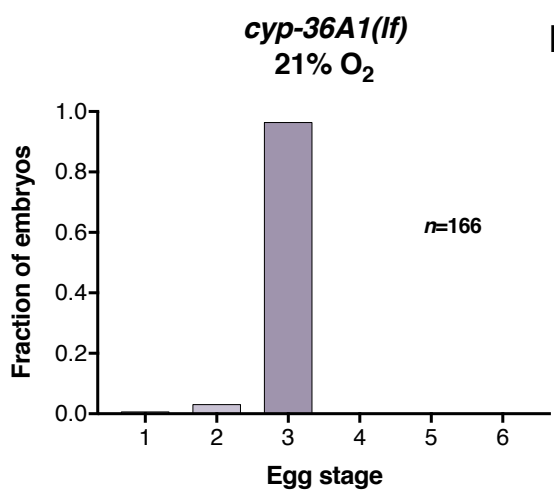**E**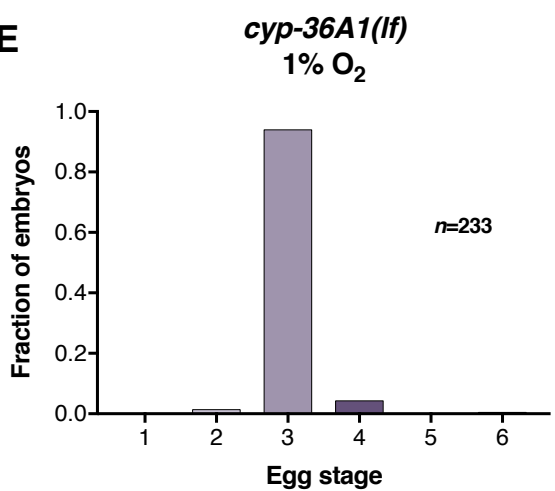

Supplement: supp [file elife-36828-supp-v1.zip]

# Survival on *Pseudomonas aeruginosa*

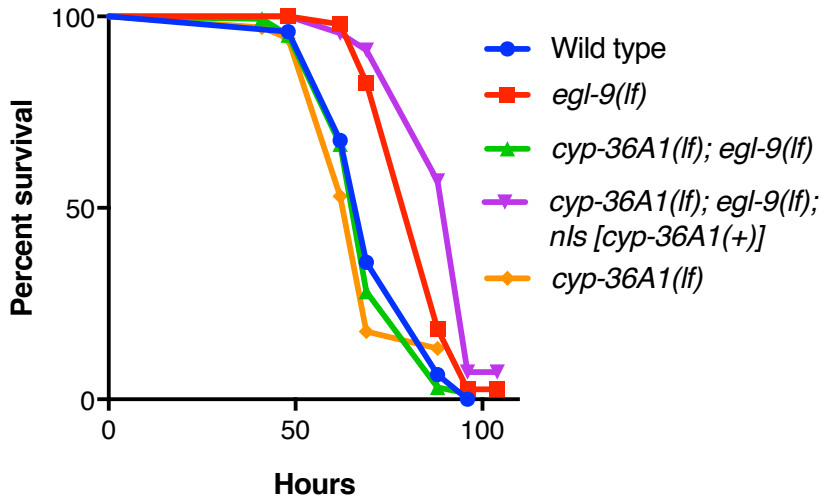

Supplement: supp [file elife-36828-supp-v1.zip]

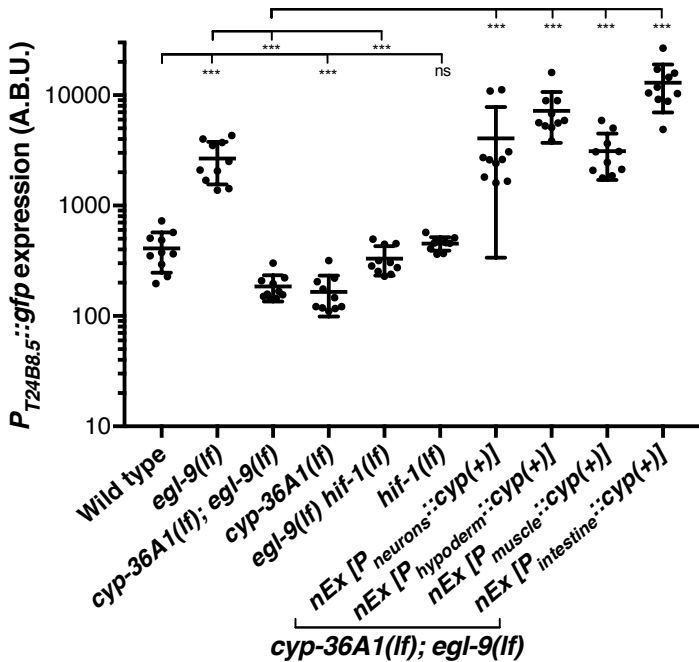

Supplement: supp [file elife-36828-supp-v1.zip]

# Survival on *Pseudomonas aeruginosa*

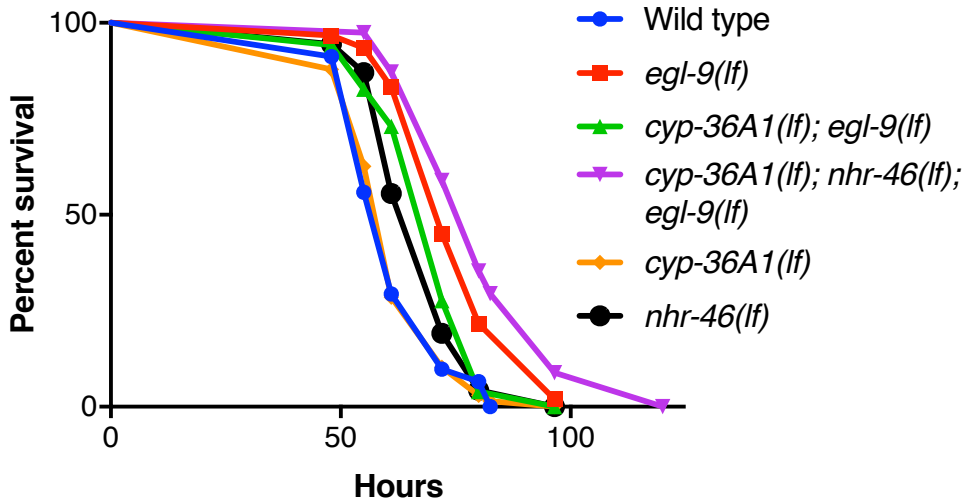

Supplement: supp [file elife-36828-supp-v1.zip]

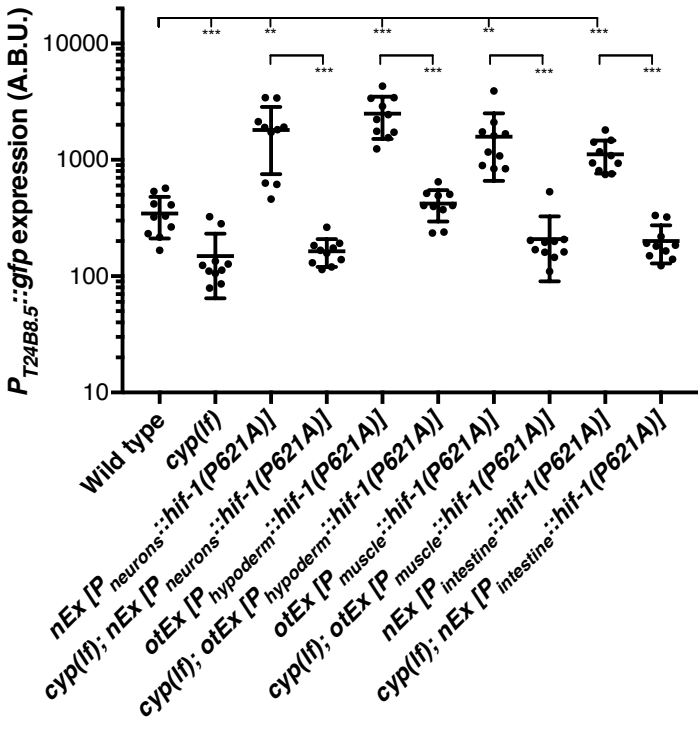

Supplement: supp [file elife-36828-supp-v1.zip]

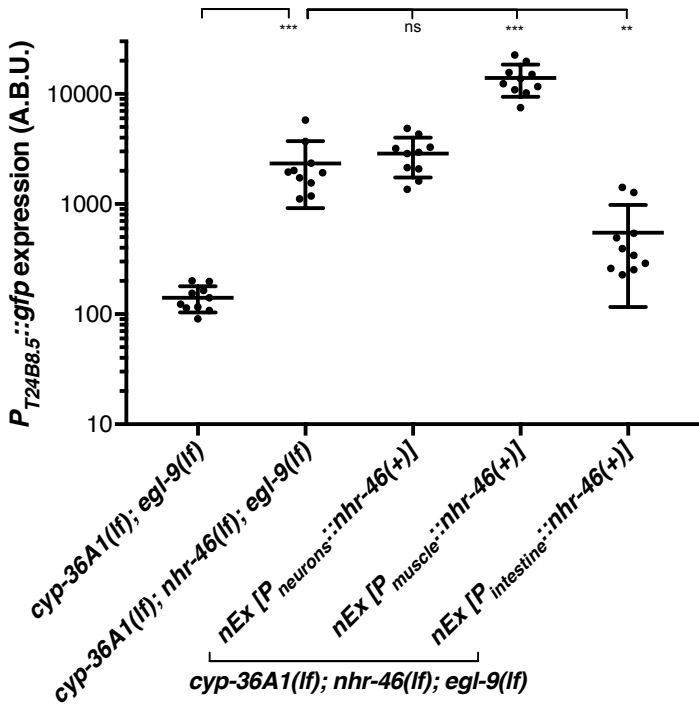

Supplement: supp [file elife-36828-supp-v1.zip › elife_poa_e36828_Figure_5_figure_supplement_1.pdf]

**A**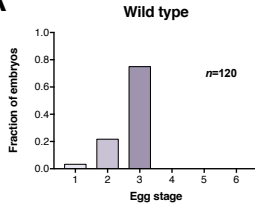**B**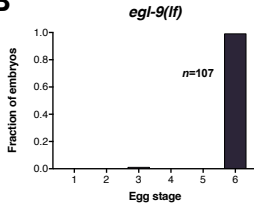**C**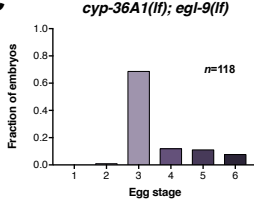**D**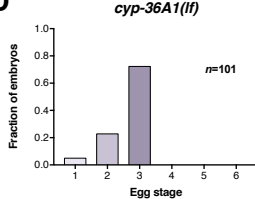**E**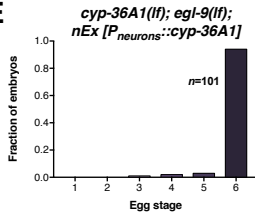**F**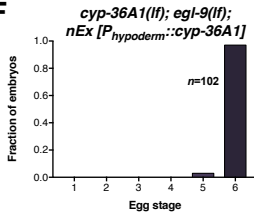**G**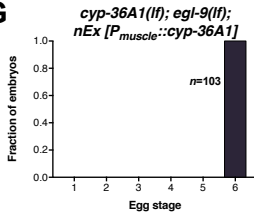**H**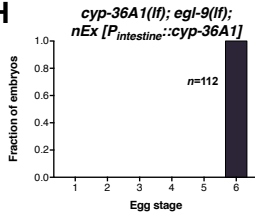

Supplement: supp [file elife-36828-supp-v1.zip › elife_poa_e36828_Figure_3_figure_supplement_3.pdf]
